# Orb-web spider color polymorphism through the eyes of multiple prey and predators

Nathalia X. Gonçalves<sup>1,2</sup>, Felipe M. Gawryszewski<sup>1</sup>

<sup>1</sup>Evolution and Sensory Ecology Lab, Departamento de Genética, Instituto de Ciências Biológicas, Universidade Federal de Goiás, Campus Samambaia, Goiânia, GO, 74690-900, Brazil,

<sup>2</sup>Pós-Graduação em Ecologia e Evolução, Universidade Federal de Goiás, Campus Samambaia, Goiânia, GO, 74690-900, Brazil.

\*Author for correspondence (xg.nathalia@gmail.com)

Running title: Orb-web spider color polymorphism

KEY WORDS: *Gasteracantha cancriformis*; Araneidae; Visual communication; Aposematism; Luring; Prey attraction

**Summary statement:** We assessed the role of both prey and predator vision on the evolution and maintenance of color polymorphism and color conspicuousness of the orb-web spider *Gasteracantha cancriformis* (Araneidae).

## ABSTRACT

The sensory drive theory predicts that signals, sensory systems, and signaling behavior should coevolve. Variation in the sensory systems of prey and predators may explain the diversity of color signals, such as color polymorphism. The spider *Gasteracantha cancriformis* (Araneidae) possesses several conspicuous color morphs. The aim of the present study was to assess whether the color polymorphism of *G. cancriformis* may be maintained by pressure from multiple signal receivers, such as prey and predators with distinct color vision systems. In orb-web spiders, the prey attraction hypothesis states that conspicuous colors are prey lures that increase spider foraging success via flower mimicry. However, in highly defended species, conspicuous colors could also be a warning signal to predators. We used color vision modelling to estimate chromatic and achromatic contrast of *G. cancriformis* morphs as perceived by potential prey and predators taxa. The results revealed that individual prey and predator taxa perceive the conspicuousness of morphs differently. Therefore, the multiple prey and multiple predator hypotheses may explain the evolution of color polymorphism in *G. cancriformis*. However, the spider's coloration did not resemble flower coloration, which suggests that the species' conspicuousness is not the result of flower mimicry. Other parameters that are not evaluated by color vision models, such as distance, shape, angle, pattern geometry, and contour, could also affect the perception of color morphs by both prey and predators and thereby influence morph survival.

## INTRODUCTION

The evolution and maintenance of color polymorphism have traditionally been attributed to apostatic selection (Clarke, 1979). Assuming that predators form a search image (Tinbergen, 1960), the advantage of rarity promotes the coexistence of multiple prey types and stabilizes polymorphisms (Bond, 2007). Nonetheless, other adaptive and non-adaptive explanations for the evolution and maintenance of color polymorphisms

have been proposed (Gray and McKinnon, 2007). For instance, gene flow between populations with distinct phenotypes that are favored by natural selection could maintain polymorphism within the individual populations (Farkas et al., 2013; Gray and McKinnon, 2007).

In the context of visual signaling, the distinct visual systems of prey and predators may play a role in the evolution and maintenance of color polymorphisms (Ruxton et al., 2004; White and Kemp, 2015). Animal communication involves the generation, emission and transmission of a signal, and processing of the signal by a receiver, in which an appropriate response is elicited (Endler, 1993). Any factors that affect these steps can influence signal efficiency and, as a result, affect the direction of communication evolution (Endler, 1993). Thus, the diversity of signals can be attributed to variation in the sensory systems of receivers. Considering that the same “color” may be perceived as cryptic or conspicuous by different species (Endler and Mappes, 2004), each color morph of polymorphic populations may represent an adaptation to particular visual systems of prey or predator species (Endler, 1992; Ruxton et al., 2004; White and Kemp, 2015).

Many orb-web spiders exhibit conspicuous coloration. The prey attraction hypothesis states that the bright coloration of some spiders lures insects, possibly by mimicking flower coloration (e.g. Craig and Ebert, 1994; Hauber, 2002). The hypothesis has been empirically tested several times, and most studies have found support for it. The polymorphic *Nephila pilipes* (Nephilidae) present a melanic and a bright colored morph (Tso et al., 2004). The bright color patterns of this species are thought to resemble symmetric flower patterns that may attract bees, owing to the innate preference of bees for symmetry (Chiao et al., 2009). Moreover, yellow patches on the spider’s body may be perceived as food resources by flowers visitors (Tso et al., 2004). Besides being attractive to pollinators, the yellow patches on the species’ body also seems to attract hymenopteran predators. Therefore, it is possible that there is a trade-off between foraging success and predation risk in polymorphic populations in which some morphs are more cryptic than others (Fan et al., 2009).

The predators of orb-web spiders possess very distinct visual systems. Birds, for example, are tetrachromats, whose photoreceptors are most sensitive to ultraviolet-

violet, blue, green, and red (Hart, 2001), whereas spider hunting wasps, such as members of the Sphecidae, are trichromats, whose photoreceptors are most sensitive to ultraviolet, blue, and green (Peitsch, 1992; Briscoe and Chittka, 2001). Similarly, the insect prey of orb-web spiders also vary in their types of color vision. For example, bees are trichromats with spectral sensitivities that are similar to those of sphecid wasps (Briscoe and Chittka, 2001), whereas some lepidopterans are tetrachromats, and some dipterans possess photoreceptors with five different sensitivity peaks (Schnaitmann et al., 2013). Therefore, the maintenance of spider color polymorphism may result not only from a trade-off between prey attraction and capture success but also from selective pressure from multiple receivers (Endler, 1992; Ruxton et al., 2004; White and Kemp, 2015). Color perception depends on both the signal reflectance and observer visual system, as well as on the background reflectance spectrum and ambient light intensity (Endler, 1990). Physiological models of color vision include all these factors and have been effective for objectively studying animal coloration (i.e., independent of human subjective assessment; Renoult, 2015).

The orb-web spider *G. cancriformis* constructs large webs and rests in the hub of the web during the day (Levi, 1978). Females of the species possess a hard abdomen with three pairs of spines and vary in color, with some morphs quite conspicuous to human observers (Levi, 1978; Gawryszewski and Motta, 2012). The ventral side of females are mostly black, sometimes with small bright spots. In one studied population, the dorsal side of females possessed black or reddish spines and four different color patterns: yellow, white, red, and a combination of black and white (Gawryszewski 2007; Gawryszewski and Motta, 2012). Adult females measure from 5 to 7 mm in length and 10 to 13 mm in width (Muma, 1971), whereas the males are brownish, small, and do not exhibit chromatic variation (Levi, 1978). The prey attraction hypothesis does not seem to explain the coloration of the orb-web spider *Gasteracantha cancriformis* (Araneidae), since both naturally bright morphs and yellow-painted individuals failed to capture more prey than either naturally cryptic morphs or black-painted individuals (Gawryszewski and Motta, 2012). Although evidence is still needed, Edmunds and Edmunds (1983) suggested that the conspicuous body coloration of *Gasteracantha* spiders might serve as a warning signal to predators. The aim of the present study was

to investigate three hypotheses for the evolution and maintenance of color polymorphism, using *G. cancriformis* as a model. Two derivations from the prey attraction hypothesis include (1) the *multiple prey hypothesis*, which posits that color morphs are perceived differently by different prey taxa and that each color morph is adapted to lure a specific type of prey, and (2) the *multiple mimic model* hypothesis, which posits that the spiders attract prey *via* aggressive mimicry of flower colors and that each color morph mimics a different flower color. In addition, (3) the *multiple predator hypothesis* posits that the conspicuous colors found in spiders could serve as warning signals to predators and that color polymorphism could evolve and be maintained if each color morph is adapted to the vision of a specific predator.

## MATERIALS AND METHODS

### Color vision model

To estimate the perception of *G. cancriformis* color morphs by distinct predators and prey groups, we used the color vision model proposed by Chittka (1992). The model requires four inputs: (1) the irradiance reaching the observed object, (2) the observer photoreceptor excitation curves, (3) the background reflectance to which photoreceptors are adapted to, and (4) the reflectance curve of the observed object. First, the sensitivity factor  $R$  was determined for each photoreceptor, as follows:

$$R = 1 / \int_{700}^{300} I_B(\lambda) S(\lambda) D(\lambda) d\lambda \quad (1)$$

where  $I_B(\lambda)$  is the spectral reflectance function of the background,  $S(\lambda)$  is the spectral sensitivity function of each photoreceptor, and  $D(\lambda)$  is the illuminant irradiance spectrum. Secondly, the quantum flux  $P$  (relative amount of photon catch) is calculated, as follows:

$$P = R \int_{700}^{300} I_S(\lambda) S(\lambda) D(\lambda) d\lambda \quad (2)$$

where  $I_S(\lambda)$  is the spectral reflectance function of the stimulus. Assuming that the maximum excitation of a photoreceptor is 1, the phototransduction process is determined by:

$$E = P/(P + 1) \quad (3)$$

137 Stimuli spectra are projected in specific color spaces. The coordinates of each  
138 spectrum are calculated using photoreceptor excitations, as follows (Chittka et al., 1994):

$$X1 = \sin 60^\circ (E_3 - E_1) \quad (4)$$

$$X2 = E_2 - 0.5 (E_1 + E_3) \quad (5)$$

139 For tetrachromat organisms (Théry and Casas, 2002):

$$X1 = \frac{2\sqrt{2}}{3} \cos 30^\circ (E_3 - E_4) \quad (6)$$

$$X2 = E_1 - \frac{1}{3} (E_2 + E_3 + E_4) \quad (7)$$

$$X3 = \frac{2\sqrt{2}}{3} [\sin 30^\circ (E_3 + E_4) - E_2] \quad (8)$$

140 We extended the model of Chittka (1992) to accommodate pentachromatic organisms,  
141 as follows:

$$X1 = \frac{5}{2\sqrt{2}\sqrt{5}} (E_2 - E_1) \quad (9)$$

$$X2 = \frac{5\sqrt{2}}{2\sqrt{3}\sqrt{5}} [E_3 - \left(\frac{E_1 + E_2}{2}\right)] \quad (10)$$

$$X3 = \frac{5\sqrt{3}}{4\sqrt{5}} [E_4 - \left(\frac{E_1 + E_2 + E_3}{3}\right)] \quad (11)$$

$$X4 = E_4 - \left(\frac{E_1 + E_2 + E_3 + E_4}{4}\right) \quad (12)$$

142 Chromatic contrast between a color stimulus and background, or between two  
143 color stimuli, is calculated as the Euclidean distance ( $\Delta S$ ) between two points in color  
144 space, as follows:

$$S = \sqrt{\sum_{i=1}^n (X_{a_i} - X_{b_i})^2} \quad (13)$$

145 where  $X_i$  ( $i = 1, 2, 3, \dots, n$ ) represents the coordinate in the color space.

The color spaces are chromaticity diagrams and, thus, do not estimate the achromatic contrast between objects. Nonetheless, achromatic contrasts can be important visual cues used by both prey and predators. In bees, achromatic contrast is more important than chromatic cues for objects that subtend a visual angle smaller than  $\sim 15^\circ$ , which means that bees have to be very close to flowers in order to use their color vision for discrimination tasks (Giurfa et al., 1997). Similarly, birds use achromatic contrast in detection of small objects (Osorio et al., 1999). We estimated the achromatic contrast as the excitation (Eq. 3) of the photoreceptor responsible for achromatic discrimination in each organism (Chittka and Kevan, 2005).

For our modeling, we used the reflectance data of *G. cancriformis* color morphs that was collected during a previous study (Gawryszewski, 2007; Gawryszewski and Motta 2012). These data have already been used to estimate the visual contrast of the yellow and white morphs and the black and white morphs from the perspective of *Apis mellifera* (Gawryszewski and Motta 2012). The spiders were collected from a Brazilian savanna physiognomy, namely Cerrado *sensu stricto*, which is characterized by shrubs and trees of 3 to 8 m tall that are contorted and possess thick, fire-resistant bark, a crown cover of  $>30\%$ , and additional herbaceous vegetation (Oliveira-Filho and Ratter, 2002). The background reflectance was estimated from the average reflectance of leafs, leaf litter, bark, and grasses that were collected from the same area as the spiders (Gawryszewski and Motta, 2012). As illuminant spectrum, we used the International Commission on Illumination (CIE) standard illuminant of D65, which is comparable to open areas, such as the Brazilian savanna (Chittka, 1996).

### Multiple prey hypothesis

Using the model described above, we estimated the chromatic and achromatic conspicuousness of the *G. cancriformis* morphs (yellow, white, red, and white parts of the black and white morph) to a suit of potential prey: *A. mellifera* (Hymenoptera, Apidae), *Drosophila melanogaster* (Diptera, Drosophilidae), and *Fabriciana adippe* (Lepidoptera, Nymphalidae). We selected these insect orders because they are commonly intercepted by orb-webs in field experiments (Craig and Ebert, 1994; Tso et al., 2002) and represent the diversity of visual systems among insects (Briscoe and

Chittka, 2001). For *A. mellifera* and *D. melanogaster*, we used photoreceptor sensitivity curves from the literature (Peitsch et al., 1992; Schnaitmann et al., 2013). It was recently shown that, together with R7-R8 photoreceptors, R1-R6 photoreceptors contribute to color vision in *D. melanogaster* (Kelber and Henze, 2013; Schnaitmann et al., 2013). Therefore, we included the R1-R6 photoreceptor curve, treating *D. melanogaster* as a pentachromat. The graphical curves were extracted directly from the figures of relevant publications using DataThief III version 1.7 (Tummers, 2006). For *Fabriciana adippe*, however, no photoreceptor sensitivity curves are available, so electrophysiological measurements of photoreceptor sensitivity peaks ( $\lambda_{\max}$ ; Eguchi et al., 1982) were used to estimate the photoreceptor curves (for details see Govardovskii et al., 2000).

For achromatic contrast, bees only use the green photoreceptor (Giurfa et al., 1996), whereas flies only use the outer photoreceptors (R1-R6; Kelber & Henze, 2013). Because the exact mechanism used by lepidopterans for achromatic discrimination is incompletely understood, we assumed that they employ the same mechanism as in bees. The color hexagon model assumes that photoreceptors respond to half their maximum for the background they are adapted to, so that the photoreceptor excitation for background is equivalent to 0.5 units (Chittka, 1992).

The multiple prey hypothesis predicts that different prey taxa perceive color morphs differently. To assess whether each spider morph was perceived differently by prey species, we constructed two linear mixed models, one for chromatic contrast and one for achromatic contrast. Either chromatic ( $\Delta S$ ) or achromatic contrast were used as the dependent variable, and spider morph and prey taxon were used as the independent variables (contrast = spider morph  $\times$  observer). The spider morph was defined as yellow, white, red, or black and white, and the observers were defined as hymenopteran, dipteran, or lepidopteran. Individual spiders were used as random effects. Normality and homogeneity were verified by visual inspection of quantile-quantile and residuals vs. fitted values plots. We computed all nested models and used the Akaike Information Criterion to select the best model.

As a reference point, we used a color discrimination threshold of  $\Delta S = 0.11$ , which is the threshold value below which trained bees are unable to distinguish different flower colors (Chittka, 1996). However, discrimination thresholds are variable and can



change depending on the study species, learning conditions, previous experience, background coloration, whether the task involves discrimination between colors or detection against the background, and whether objects are compared sequentially or simultaneously (Avarguès-Weber & Giurfa, 2014).

### **Multiple mimic models hypothesis**

To test the multiple mimic models hypothesis, we compared how flowers and spider morphs are perceived by prey. We gathered all flower reflectance data available in the Floral Reflectance Database (FReD; Arnold et al., 2010), excluding reflectance data from lower flower parts, leaves, bracts, stamens, the inner parts of bell-shaped flowers, and unknown items, as well as spectrum files that did not cover 300 to 700 nm. Most species in the database have only one reflectance spectrum, and for species with multiple reflectance spectra, we randomly selected a single spectra. We did not average the reflectance of these species because there was no information available on whether these measurements referred to different individuals or different parts of single flowers. In total, we gathered reflectance data from 859 plant species.

We calculated a matrix of chromaticity distances between average color loci of each spider color morph and each individual flowers species and plotted these values using a Kernel density estimation. If spiders are mimicking some group of flower colors, we would expect to find at least one peak near or below the theoretical detection threshold of 0.11. We also followed the same procedure for the achromatic difference between individual flowers and average color loci of each color morph. If spiders and flowers are similar in the achromatic dimension, we would expect to find a peak near 0.5.

### **Multiple predator hypothesis**

The methodology used to investigate the multiple predator hypothesis methodology was very similar to that used for the multiple prey hypothesis, except that we used predator species in our models. As predators, we considered the bird *Parus caeruleus* (Paridae) and the wasp *Philanthus triangulum* (Sphecidae), since birds and wasps are the main predators of orb-web spiders (Rayor, 1996; Foelix, 2010), are visually guided hunters,

and have distinct color vision systems. For *P. caeruleus*, we used photoreceptor sensitivity curves available in the literature (Hart, 2001), and for *P. triangulum*, we used photoreceptor sensitivity peaks to estimate photoreceptor sensitivity curves (data available in Briscoe and Chittka, 2001; see Govardovskii et al. 2000 for estimation of sensitivity curves from sensitivity peaks).

The multiple predator hypothesis predicts that different predator taxa perceive color morphs differently. To assess this prediction, we established two linear mixed models, one for chromatic contrast and one for achromatic contrast. Either chromatic ( $\Delta S$ ) or achromatic contrast were used as the dependent variable, and spider morph and predator taxon were used as the independent variables (contrast = spider morph  $\times$  observer). The spider morph was defined as yellow, white, red, or black and white, and individual spiders were used as random effects. Normality and homogeneity were verified by visual inspection of quantile-quantile and residuals vs. fitted values plots. We computed all nested models and used the Akaike Information Criterion to select the best model.

As in the multiple prey hypothesis, we used discrimination thresholds as reference points. For the chromatic contrast, we considered color discrimination thresholds of  $\Delta S = 0.11$  and  $\Delta S = 0.06$  for the wasp (Dyer and Chittka, 2004) and bird (Théry et al., 2005), respectively. For the achromatic contrast, we considered double cones in birds (Hart, 2001), and assumed green photoreceptors for wasps, as in bees.

Visual modeling calculations were conducted using the ‘colourvision’ R package (Gawryszewski, 2017). Linear mixed models were performed using the ‘nlme’ package (Pinheiro et al., 2016), and graphs were plotted using the ‘ggplot2’, ‘ggExtra’, and ‘gridExtra’ packages (Wickham, 2009; Attali, 2016; Auguie, 2016; R Core Team, 2015).

## RESULTS

### Multiple prey hypothesis

For chromatic contrast, the model that included the interaction between spider morph and prey taxon presented the lowest AIC value (Table 1). The yellow morph presented the highest  $\Delta S$  value for *A. mellifera* and *F. adippe* vision, whereas the white spider presented the highest  $\Delta S$  value for *D. melanogaster*, followed by the yellow morph (Fig.

1). The white patch of the black and white spiders presented a  $\Delta S$  value that was very close to the theoretical discrimination threshold for all prey species (Fig. 1). The red spiders presented  $\Delta S$  values near the theoretical discrimination threshold for *A. mellifera* and *D. melanogaster*, but not for *F. adippe* (Fig. 1). For prey achromatic contrast, the model that included the interaction between variables presented the lowest AIC value (Table 1). For all prey groups, the white morph had the highest excitation value, followed by the black and white, yellow, and red morphs, respectively (Fig. 1). The model coefficients are provided in the supplementary material (Table S1 and S2).

### Multiple mimic models hypothesis

For *A. mellifera*, *D. melanogaster*, and *F. adippe*, only the white patch of the black and white morph had a density peak near the theoretical discrimination threshold of 0.11 when compared to all flower reflectance spectra (Fig. 2). For all three prey taxa, the white morph showed a scattered density, with higher densities varying from 0.2 until 0.8 in Euclidean distance units. Other morphs showed more homogeneous density curves, for *A. mellifera*, the red morph peak was closer to the discrimination threshold (Euclidean distance around 0.2) than the yellow morph (Euclidean distance around 0.4). Red and yellow morphs had similar density peaks of Euclidean distance, around 0.3 in *D. melanogaster* vision. For *F. adippe*, both peaks were distant from the discrimination threshold, more than 0.4. In the achromatic dimension, the red morph was the only one with a density peak near 0.5 (Fig. 3). All three prey taxa had similar density curves for the white, yellow and red morphs, hanging from 0 to 0.2. Except for *D. melanogaster*, which presented a scattered density distribution for the yellow morph.

### Multiple predator hypothesis

For the chromatic contrast, the model with interaction between variables presented the lowest AIC value (Table 1). The black and white morph presented the lowest  $\Delta S$  value for both predators (Fig. 4A,B; Table S3). The yellow morph was the one with highest  $\Delta S$  value for *P. caeruleus*, though white and red morphs presented similar values (Fig. 4A). For *P. triangulum*, the white spider morph presented the highest  $\Delta S$  value, followed by the yellow and red morphs, and the red morph was near the theoretical discrimination

threshold of 0.11 (Fig. 4B). For the achromatic contrast, the model that included the interaction between variables presented the lowest AIC value (Table 1), even though the values of the two predator species were very similar. For *P. caeruleus*, the white morph had the highest excitation value, followed by the yellow, black and white, and red morphs, respectively (Fig. 4C). The white morph also had the highest excitation value for *P. triangulum*, followed by the black and white, yellow, and red morphs, respectively (Fig. 4D). The model coefficients are provided in the supplementary material (Table S3 and S4)

## DISCUSSION

Our statistical analyses suggested that the multiple prey and multiple predator hypotheses, but not the flower mimicry hypothesis, are plausible explanations for the evolution of color polymorphism in *G. cancriformis*. If conspicuous colors in orb-web spider attracts prey, then polymorphism may occur in luring systems by multiple mimic models that act as sensory traps for particular prey taxa. Conversely, polymorphism may occur as a result of multiple receiver biases, where each morph lures specific prey taxa that possess specific sensory, neural, or perceptual biases (White and Kemp, 2015). In *G. cancriformis*, spider morphs conspicuousness is perceived differently by prey species. The yellow and white morphs were the most conspicuous to all prey taxa. The former being more contrasting from the background for honeybee color vision, and the latter, for flies. Whereas, the red morph, although inconspicuous for honeybee and flies, showed high detectability for butterflies. Furthermore, yellow spider morphs could experience higher foraging success as a result of insects preference for yellow signals. Yellow pollen and yellow flower centers, both of which are likely adapted to insect visual systems, are among the most common traits of floral color patterns (Papiorek et al., 2016; Lunau, 2000). On the other hand, red morphs are conspicuous to lepidopterans and may be effective for attracting them. Therefore, the distinct perceptions of insect taxa support the multiple prey hypothesis as a mechanism for the evolution of color polymorphism in stationary predators.

For the achromatic dimension, the statistical analyses also suggested an interaction between spider morph and prey taxon. However, there was very little

difference between the morphs when viewed by different prey. Therefore, the differences in achromatic contrast between prey perception may be statistically significant but not biologically relevant. A recently proposed scenario for the evolution of color polymorphism is that different morphs exploit different visual channels in prey. The yellow morphs of *G. fornicata* would benefit from stimulating the dipteran chromatic channel, whereas white morphs would benefit from stimulating the achromatic channel (White and Kemp, 2016). However, this is inconsistent with *G. cancriformis* because the spider morphs presented similar levels of achromatic detectability by all the prey taxa examined.

Several authors have proposed flower mimicry as a mechanism of prey attraction by orb-web spiders *via* conspicuous body coloration (e.g. Craig and Ebert, 1994; Hauber, 2002). However, the hypothesis has seldom been tested. Our density graphs show that the color of most of the *G. cancriformis* morphs was not similar to any group of flowers, which suggests that the coloration of the *G. cancriformis* did not result from flower mimicry. Conversely, a study of various orb-web spider species that also used color vision models found that, as perceived by dipterans and hymenopterans, the colors of spiders are very similar to those of flowers (White et al., 2016). It is tempting to use correlational data to infer causal relationships, however, this finding may only reflect the diversity of flower colors and spider colors. Color vision modelling of the prey of the orchid mantis (*Hymenopus coronatus*) suggested that pollinators are unable to distinguish the colors of the mantis and flowers, and a field experiment showed that the mantis actually attracts more pollinators than flowers (O’Hanlon et al., 2013). However, the modification of non-color mantis traits suggested that other types of flower mimicry, such as symmetry, contrasting color patterns, and morphological similarities to flower petals, had no effect on prey attraction (O’Hanlon, 2014). Therefore, mantis coloration is effective in attracting prey, but may not result from flower mimicry. Instead, it may result from sensory exploitation (O’Hanlon, 2014).

The results of the present study also support the multiple predator hypothesis for the maintenance of color polymorphism in *G. cancriformis*, as the spider morphs conspicuousness was perceived differently by predator species in both the chromatic and achromatic dimensions. The red morph could be targeting bird predators but

would appear relatively inconspicuous to a hymenopteran predator. In contrast, the white and yellow morphs are highly detectable by both predator taxa. The colors of two of the four *G. cancriformis* morphs (yellow and red) are typical of aposematic species (Endler and Mappes, 2004). Conspicuous coloration is especially advantageous when it increases the mismatch with the background and facilitates predator learning (Endler and Greenwood, 1988). Spiders of the genus *Gasteracantha* possess spines and a hard abdomen. Moreover, the hunting wasp *Sceliphron laetum* avoids provisioning initial instars with *Gasteracantha* spiders (Elgar and Jebb, 1999). Morphological and behavioral defenses that make ingestion difficult may also constitute an aposematic signal, along with the species' bright colors, which enhance predator memory and learning (Endler and Greenwood, 1988; Ruxton et al., 2004). Though aposematism is not commonly reported in spiders (Oxford and Gillespie, 1998), Brandley et al. (2016) conducted an experiment with black widow models and found that models with red markings were more likely to be avoided by birds than all black models. If spider morphs are conspicuous to prey but do not resemble flowers, it is possible that the conspicuousness of *G. cancriformis* reflects a trade-off between an antipredatory strategy and foraging success, in which common spiders morphs would be avoided by prey.

Thermoregulation is another possible explanation for color polymorphism in orb-web spiders. In *Verrucosa arenata* (Araneidae), yellow and white morphs exhibited different thermal responses when exposed to artificial heat. The white morphs absorbed less visible radiation and shorter wavelengths than the yellow morphs, which could protect the spiders' internal tissue from the harmful effects of UV radiation (Rao and Mendoza-Cuenca, 2016). However, absorbing pigments are likely to offer protection against UV damage (Gawryszewski et al., 2015), which is analogous to the melanin found in the human epidermis (Brenner and Hearing, 2008) and commercial sunscreen lotions (Antoniou et al., 2008).

We only considered chromatic and achromatic discrimination, but color pattern geometry, shape, contour, size, angle, texture, and distance of visual detection (Troschianko et al., 2009) may also influence the behavior of both prey and predators toward spiders since different species use distinct visual cues for stimuli detection and recognition (Théry and Gomez, 2010). Furthermore, color vision models do not include

other perceptual mechanisms, such as cognition, color categorization, past experiences, or memory imprecision (Renoult et al., 2015), even though these factors may affect detectability and, consequently, influence the survival rate of morphs in different ways (Théry and Gomez, 2010). Additionally, non-adaptive explanations, such as overdominance and allele equilibrium in absence of selection, are often ignored by when studying polymorphisms in an ecological perspective. Finally, predation experiments and field experiments that evaluate the prey taxa caught by the different spider morphs are paramount to validate and complement the findings of the present study.

### Acknowledgments

We thank CAPES for financial support (CAPES/PROEX), and for a scholarship awarded to NXG.

### Competing interests

No competing interests declared.

### Funding

This work was supported by CAPES - Brazilian Federal Agency for Support and Evaluation of Graduate Education within the Ministry of Education of Brazil.

### References

- Antoniou, C., Kosmadaki, M. G., Stratigos, A. J. and Katsambas, A. D. (2008). Sunscreens—what's important to know. *J. Eur. Acad. Dermatol. Venereol.*, **22**(9), 1110-1119.
- Arnold, S. E. J., Faruq, S., Savolainen, V., McOwan, P. W. and Chittka, L. (2010). FReD: The Floral Reflectance Database — A Web Portal for Analyses of Flower Colour. *PLoS ONE* **5**(12): e14287. doi:10.1371/journal.pone.0014287.
- Avarguès-Weber, A. and Giurfa, M. (2014). Cognitive components of color vision in honey bees: how conditioning variables modulate color learning and discrimination. *J. Comp. Physiol. A*, **200**(6), 449-461.



- Attali, D.** (2016). *R package 'ggExtra': Add marginal histograms to 'ggplot2', and more 'ggplot2' enhancements* (version 0.6). <https://CRAN.R-project.org/package=ggExtra>
- Auguie, B.** (2016). *R package 'gridExtra': Miscellaneous functions for "grid" graphics* (version 2.2.1). <https://CRAN.R-project.org/package=gridExtra>
- Bond, A. B.** (2007). The Evolution of Color Polymorphism: Crypticity, Searching Images, and Apostatic Selection. *Annu. Rev. Ecol. Evol. Syst.*, **38**, 489–514.
- Brandley, N., Johnson, M. and Johnsen, S.** (2016). Aposematic signals in North American black widows are more conspicuous to predators than to prey. *Behav. Ecol.*, p.arw014.
- Brenner, M. and Hearing, V. J.** (2008). The protective role of melanin against UV damage in human skin. *Photochem. and photobiol.*, **84**(3), 539-549.
- Briscoe, A. D. and Chittka, L.** (2001). The evolution of color vision in insects. *Annu. Rev. Entomol.*, **46**, 471-510.
- Chiao, C.-C., Wu, W.-Y., Chen, S.-H. and Yang, E.-C.** (2009). Visualization of the spatial and spectral signals of orb-weaving spiders, *Nephila pilipes*, through the eyes of a honeybee. *J. Exp. Biol.*, **212**, 2269–78.
- Chittka, L.** (1992). The colour hexagon: a chromaticity diagram based on photoreceptor excitations as a generalized representation of colour opponency. *J. Comp. Physiol. A*, **170**(5), 533-543.
- Chittka, L.** (1996). Optimal sets of color receptors and color opponent systems for coding of natural objects in insect vision. *J. Theor. Biol.*, **181**(2), 179-196.
- Chittka, L. and Kevan, P. G.** (2005). Flower colour as advertisement. *Pract. Pollinat. Biol.*, 157–230.
- Chittka, L., Shmida, A., Troje, N. and Menzel, R.** (1994). Ultraviolet as a component of flower reflections, and the colour perception of hymenoptera. *Vision Res.*, **34**, 1489–1508.
- Clarke, B. C.** (1979). The evolution of genetic diversity. *Proc. R. Soc. Lond.*, **205**, 453-474.
- Craig, C. L. and Ebert, K.** (1994). Colour and Pattern in Predator–Prey Interactions: The Bright Body Colours and Patterns of a Tropical Orb-Spinning Spider Attract Flower-Seeking Prey. *Funct. Ecol.*, **8**, 616–620.



- Dyer, A. G. and Chittka, L.** (2004). Fine colour discrimination requires differential conditioning in bumblebees. *Naturwissenschaften*, **91**(5), 224-227.
- Edmunds, J. and Edmunds, M.** (1983). The defensive mechanisms of orb weavers (Araneae: Araneidae) in Ghana, West Africa. In: *Proc. 9th Int. Cong. Arachnol.*, Panama, 73-89.
- Eguchi, E., Watanabe, K., Hariyama, T. and Yamamoto, K.** (1982). A comparison of electrophysiologically determined spectral responses in 35 species of Lepidoptera. *J. Insect Physiol.*, **28**, 675-682.
- Elgar, M. A. and Jebb, M.** (1999). Nest provisioning in the mud-dauber wasp *Sceliphron laetum* (F. Smith): Body mass and taxa specific prey selection. *Behaviour*, **136**, 147-159.
- Endler, J. A.** (1990). On the measurement and classification of colour in studies of animal colour patterns. *Biol. J. Linn. Soc.*, **41**, 315-352.
- Endler, J. A.** (1992). Signals, signal conditions, and the direction of evolution. *Am. Nat.* S125-S153.
- Endler, J. A.** (1993). Some general comments on the evolution and design of animal communication systems. *Philos. Trans. R. Soc. B Biol. Sci.*, **340**, 215-225.
- Endler, J. A. and Greenwood, J.** (1988). Frequency-dependent predation, crypsis and aposematic coloration [and Discussion]. *Philos. Trans. R. Soc. Lond. B*, **319**, 505-523.
- Endler, J. A. and Mappes, J.** (2004). Predator mixes and the conspicuousness of aposematic signals. *Am. Nat.*, **163**, 532-547.
- Fan, C. M., Yang, E. C. and Tso, I. M.** (2009). Hunting efficiency and predation risk shapes the color-associated foraging traits of a predator. *Behav. Ecol.* **20**, 808-816.
- Farkas, T. E., Mononen, T., Comeault, A. A., Hanski, I., and Nosil, P.** (2013). Evolution of camouflage drives rapid ecological change in an insect community. *Curr Biol*, **23**(19), 1835-1843.
- Foelix, R. F.** (2010). *Biology of Spiders*. Oxford: Oxford University Press.
- Gawryszewski, F. M.** (2007). Policromatismo e *stabilimentum* em *Gasteracantha cancriformis* (Araneae, Araneidae): caracterização e as hipóteses da atração de presas e da proteção da teia. *Masters Thesis, Universidade de Brasília*.

- Gawryszewski, F. M.** (2017). Colour vision models: a practical guide, some simulations, and colourvision R package. *BioRxiv*, doi: <https://doi.org/10.1101/103754>
- Gawryszewski, F. M. and Motta, P. C.** (2012). Colouration of the orb-web spider *Gasteracantha cancriformis* does not increase its foraging success. *Ethol. Ecol. Evol.* **24**, 23–38.
- Gawryszewski, F. M., Birch, D., Kemp, D. J. and Herberstein, M. E.** (2015). Dissecting the variation of a visual trait: the proximate basis of UVVisible reflectance in crab spiders (Thomisidae). *Funct. Ecol.*, **29**(1), 44–54.
- Giurfa, M., Vorobyev, M., Kevan, P., and Menzel, R.** (1996). Detection of coloured stimuli by honeybees: minimum visual angles and receptor specific contrasts. *J Comp Physiol A*, **178**(5), 699–709.
- Giurfa, M., Vorobyev, M., Brandt, R., Posner, B. and Menzel, R.** (1997). Discrimination of coloured stimuli by honeybees: alternative use of achromatic and chromatic signals. *J. Comp. Physiol. A*, **180**, 235–243.
- Govardovskii, V. I., Fyhrquist, N., Reuter, T., Kuzmin, D. G. and Donner, K.** (2000). In search of the visual pigment template. *Vis. Neurosci.*, **17**, 509–528.
- Gray, S. M. and McKinnon, J. S.** (2007). Linking color polymorphism maintenance and speciation. *Trends Ecol. Evol.* **22**, 71–79.
- Hart, N. S.** (2001). The visual ecology of avian photoreceptors. *Prog. Retin. Eye Res.*, **20**(5), 675–703.
- Hauber, M. E.** (2002). Conspicuous colouration attracts prey to a stationary predator. *Ecol. Entomol.* **27**, 686 - 691.
- Kelber, A. and Henze, M. J.** (2013). Colour vision: Parallel pathways intersect in *Drosophila*. *Curr. Biol.* **23**(23), R1043–R1045.
- Levi, H. W.** (1978). The American orb-weaver genera *Colphepeira*, *Micrathena* and *Gasteracantha* North of Mexico (Araneae, Araneidae). *Bull. Mus. Comp. Zool.* **148**: 417–442.
- Lunau, K.** (2000). The ecology and evolution of visual pollen signals. *Plant Syst. Evol.*, **222**(1), 89–111.
- Muma, M. H.** (1971). Biological and behavioral notes on *Gasteracantha cancriformis* (Arachnida: Araneidae). *Fla. Entomol.* **54**, 345–351.

- O'Hanlon, J.C. (2014). The roles of colour and shape in pollinator deception in the orchid mantis *Hymenopus coronatus*. *Ethology*, **120**(7), 652-661.
- O'Hanlon, J. C., Holwell, G. I. and Herberstein, M. E. (2013). Pollinator deception in the orchid mantis. *Am. Nat.*, **183**(1), 126-132.
- Oliveira-Filho, A. T. and Ratter, J. A. (2002). Vegetation Physiognomies and Woody Flora of the Cerrado Biome. *Cerrados Brazil Ecol. Nat. Hist. a Neotrop. Savanna* 91-120.
- Osorio, D., Miklosi, A. and Gonda, Z. (1999). Visual ecology and perception of coloration patterns by domestic chicks. *Evol. Ecol.* **13**(7-8), 673-689.
- Oxford, G. S. and Gillespie, R. G. (1998). Evolution and ecology of spider coloration. *Annu. Rev. Entomol.*, **43**, 619-643.
- Papiorek, S., Junker, R. R., Alves dos Santos, I., Melo, G. A., Amaral Neto, L. P., Sazima, M., Wolowski, M., Freitas, L. and Lunau, K. (2016). Bees, birds and yellow flowers: pollinator-dependent convergent evolution of UV patterns. *Plant Biol.*, **18**(1), 46-55.
- Peitsch, D., Fietz, A., Hertel, H., de Souza, J., Ventura, D. F. and Menzel, R. (1992). The spectral input systems of hymenopteran insects and their receptor-based colour vision. *J. Comp. Physiol. A*, **170**, 23-40.
- Pinheiro, J., Bates, D., DebRoy, S., Sarkar, D. and R Core Team (2016). *R package 'nlme': Linear and Nonlinear Mixed Effects Models* (version 3.1-128). <http://CRAN.R-project.org/package=nlme>.
- R Core Team (2015). R: A language and environment for statistical computing. R Foundation for Statistical Computing, Vienna, Austria. <https://www.R-project.org/>.
- Rao, D. and Mendoza-Cuenca, L. (2016). The effect of colour polymorphism on thermoregulation in an orb web spider. *Sci. Nat.*, **103**(7-8), 1-5.
- Rayor, L. (1996). Attack strategies of predatory wasps (Hymenoptera: Pompilidae; Sphecidae) on colonial orb web-building spiders (Araneidae: *Metepeira Incrassata*). *J. Kans. Entomol. Soc.*, **69**, 67-75.
- Renoult, J. P., Kelber, A. and Schaefer, H. M. (2015). Colour spaces in ecology and evolutionary biology. *Biol. Ver.*
- Ruxton, G. D., Sherratt, T. N. and Speed, M. P. (2004). *Avoiding Attack*. First edition.

Oxford: Oxford University Press, USA.

**Schnaitmann, C., Garbers, C., Wachtler, T. and Tanimoto, H.** (2013). Color discrimination with broadband photoreceptors. *Curr. Biol.*, **23**(23), 2375-2382.

**Tinbergen, L.** (1960). The natural control of insects in pine woods I. Factors influencing the intensity of predation by songbirds. *Arch. Néerl. Zool.* **13**, 265h. N.

**Théry, M. and Gomez, D.** (2010). Insect colours and visual appearance in the eyes of their predators. *Adv. Insect Physiol.* **38**, 267 - 353.

**Théry, M., Debut, M., Gomez, D. and Casas, J.** (2005). Specific color sensitivities of prey and predator explain camouflage in different visual systems. *Behav. Ecol.*, **16**, 25-29.

**Troscianko, T., Benton, C. P., Lovell, P. G., Tolhurst, D. J. and Pizlo, Z.** (2009). Camouflage and visual perception. *Philos. Trans. R. Soc. B Biol. Sci.*, **364**, 449 - 461.

**Tso, I. M.** (2013). Insect view of orb spider body colorations. In *Spider Ecophysiology* (pp. 319-332). Springer Berlin Heidelberg.

**Tso, I., Tai, P., Ku, T., Kuo, C. and Yang, E.** (2002). Colour-associated foraging success and population genetic structure in a sit-and-wait predator *Nephila maculata* (Araneae: Tetragnathidae). *Anim. Behav.*, **63**, 175–182.

**Tso, I., Lin, C. and Yang, E.** (2004). Colourful orb-weaving spiders, *Nephila pilipes*, through a bee's eyes. *J. Exp. Biol.*, **207**, 2631–2637.

**Tummers, B.** (2006). DataThief III. <http://datathief.org/>

**White, T. E., Dalrymple, R. L., Herberstein, M. E. and Kemp, D. J.** (2016). The perceptual similarity of orb-spider prey lures and flower colours. *Evol. Ecol.*, 1-20.

**White, T. E. and Kemp, D. J.** (2015). Technicolour deceit: a sensory basis for the study of colour-based lures. *Anim. Behav.* **105**, 231–243.

**White, T. E. and Kemp, D. J.** (2016). Colour polymorphic lures target different visual channels in prey.

**Wickham, H.** (2009). *R package 'ggplot2': Elegant graphics for data analysis*. Springer-Verlag New York.

Table

Table 1. Delta Akaike Information Criterion (AIC) of Linear Mixed Models of the chromatic and achromatic contrasts of prey and predators.

| Model                                                              | df        | AIC        |
|--------------------------------------------------------------------|-----------|------------|
| <i>Multiple prey hypothesis</i>                                    |           |            |
| <b>Chromatic dimension</b>                                         |           |            |
| $\Delta \sim \text{morph} * \text{observer}$                       | 17        | 0.0        |
| $\Delta \sim \text{morph} + \text{observer}$                       | 11        | 23.9       |
| $\Delta \sim \text{observer}$                                      | 8         | 52.4       |
| $\Delta \sim \text{morph}$                                         | 9         | 61.5       |
| $\Delta \sim 1$                                                    | 6         | 90.6       |
| <b>Achromatic dimension</b>                                        |           |            |
| <b>excitation <math>\sim \text{morph} * \text{observer}</math></b> | <b>17</b> | <b>0.0</b> |
| excitation $\sim \text{morph} + \text{observer}$                   | 11        | 57.6       |
| excitation $\sim \text{morph}$                                     | 9         | 72.2       |
| excitation $\sim \text{observer}$                                  | 8         | 84.7       |
| excitation $\sim 1$                                                | 6         | 100.2      |
| <i>Multiple predator hypothesis</i>                                |           |            |
| <b>Chromatic dimension</b>                                         |           |            |
| $\Delta \sim \text{morph} * \text{observer}$                       | 13        | 0.0        |
| $\Delta \sim \text{morph} + \text{observer}$                       | 10        | 6.9        |
| $\Delta \sim \text{observer}$                                      | 7         | 30.6       |
| $\Delta \sim \text{morph}$                                         | 9         | 54.5       |
| $\Delta \sim 1$                                                    | 6         | 74.9       |
| <b>Achromatic dimension</b>                                        |           |            |
| <b>excitation <math>\sim \text{morph} * \text{observer}</math></b> | <b>14</b> | <b>0.0</b> |
| excitation $\sim \text{morph} + \text{observer}$                   | 10        | 14.4       |
| excitation $\sim \text{observer}$                                  | 7         | 21.1       |
| excitation $\sim \text{morph}$                                     | 9         | 36.9       |
| excitation $\sim 1$                                                | 6         | 43.9       |

## Figures

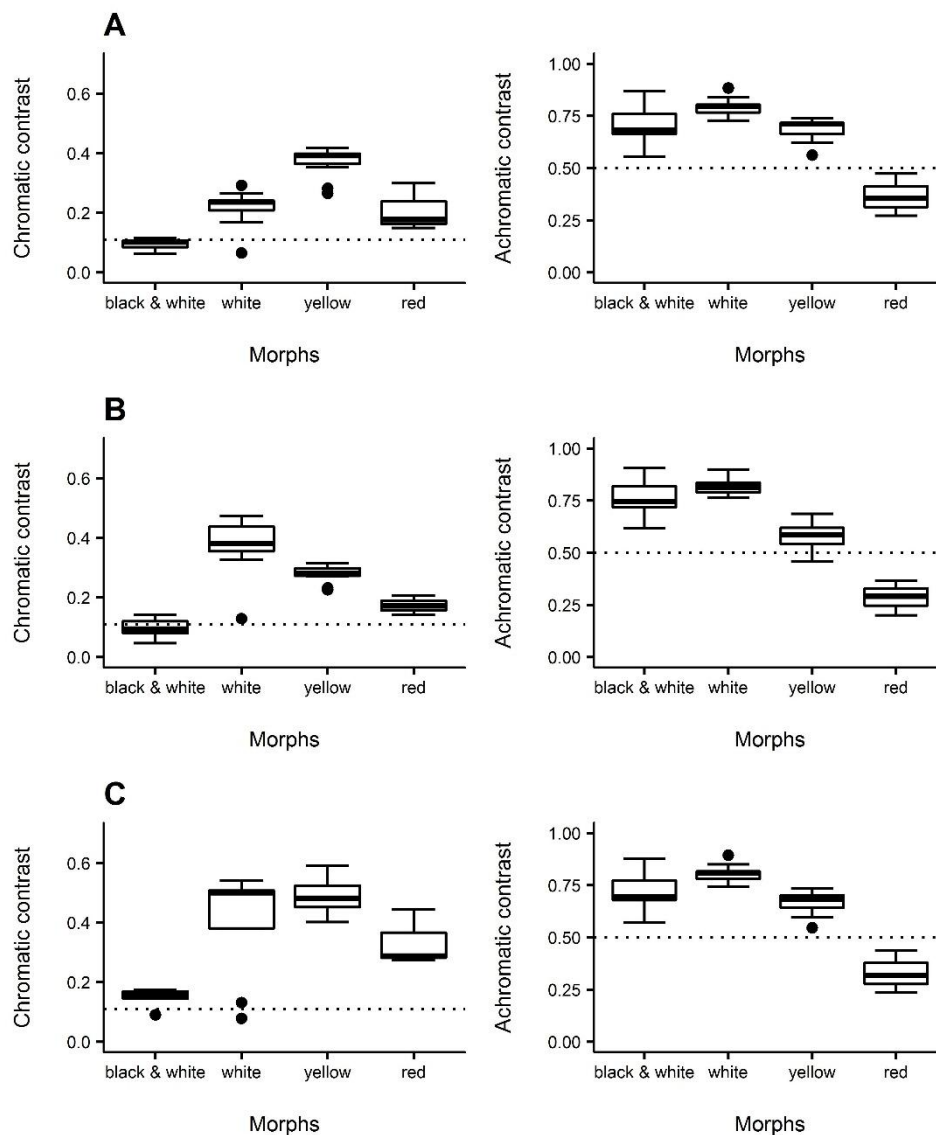

**Fig. 1.** Chromatic (left) and achromatic (right) contrasts of four *Gasteracantha cancriformis* morphs (black and white, N=6; white, N=10; yellow, N=13; and red, N=3) when viewed against a Brazilian savanna background by prey with distinct visual systems. (A) *Apis mellifera* (Hymenoptera). (B) *Drosophila melanogaster* (Diptera). (C) *Fabriciana adippe* (Lepidoptera). Dotted vertical lines represent the discrimination thresholds for chromatic contrast (0.11) and photoreceptor excitation for background in achromatic contrast (0.5).

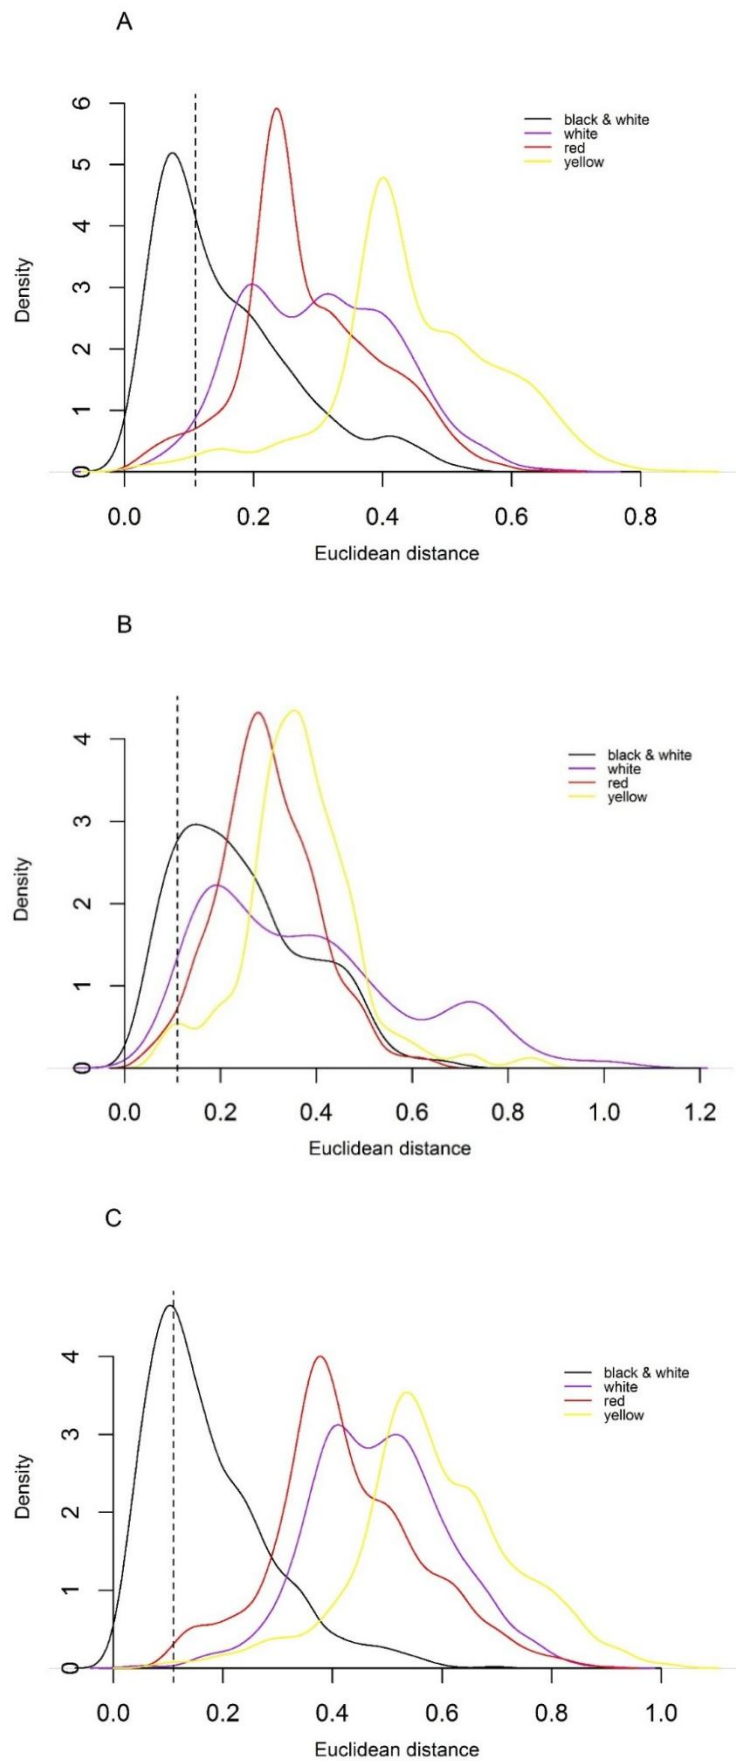

**Fig. 2.** Kernel density estimation of the Euclidean distance between four *Gasteracantha*  
*canriformis* morphs (black and white, N=6; white, N=10; yellow, N=13; and red, N=3)  
and flower reflectance (N=859). Estimations were based on the photoreceptors of (A)  
*Apis mellifera* (Hymenoptera), (B) *Drosophila melanogaster* (Diptera), and (C)  
*Fabriciana adippe* (Lepidoptera). Dotted vertical line represents the crude  
approximation of the color discrimination threshold.



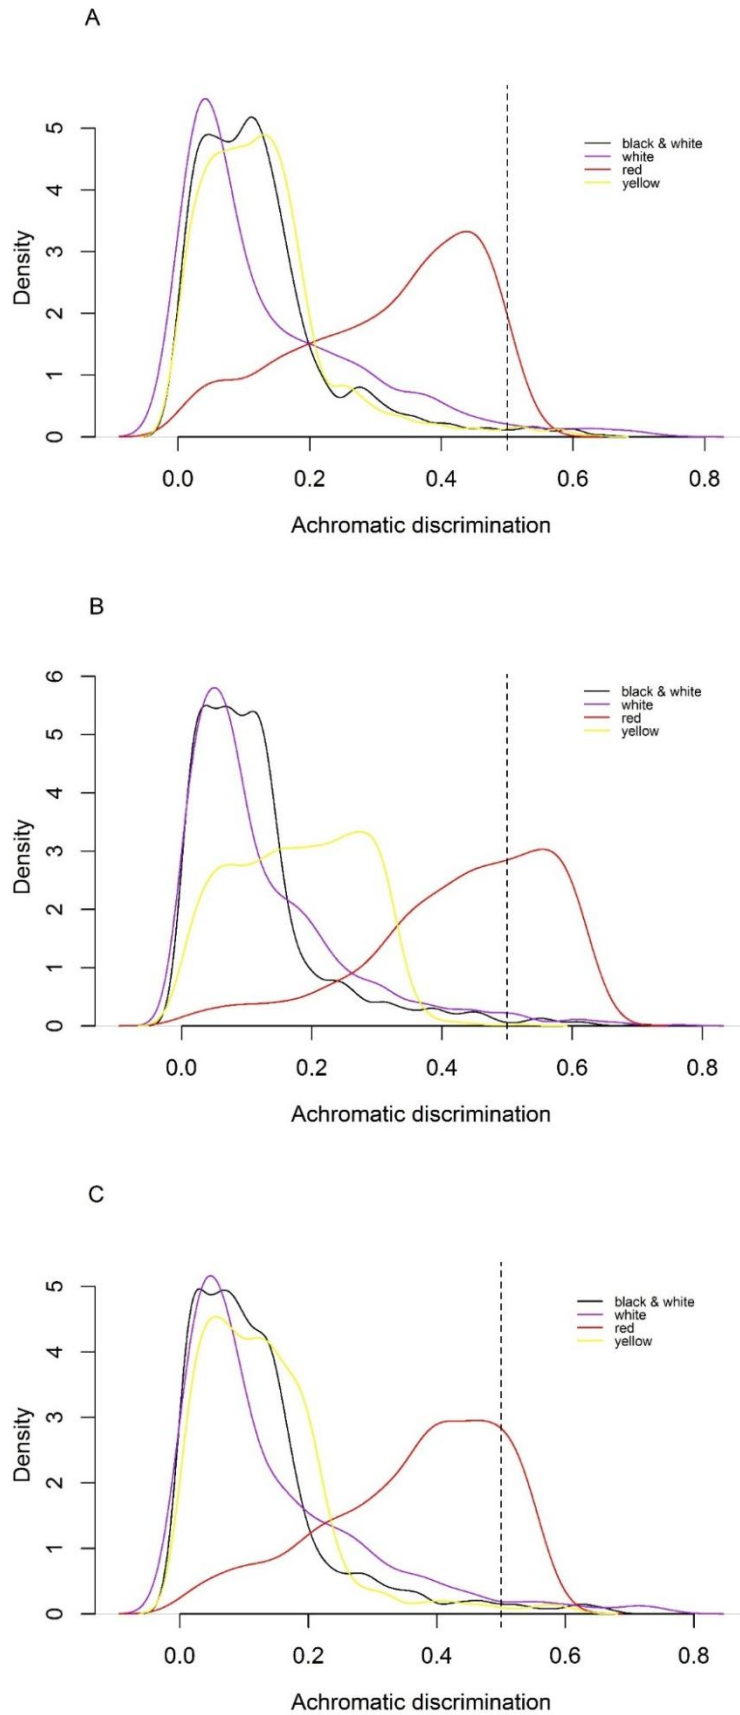

**Fig. 3.** Kernel density estimation of achromatic contrast between four *Gasteracantha cancriformis* morphs (black and white, N=6; white, N=10; yellow, N=13; and red, N=3) and flower reflectance (N=859). Estimations were based on the photoreceptors of (A) *Apis mellifera* (Hymenoptera), (B) *Drosophila melanogaster* (Diptera), and (C) *Fabriciana adippe* (Lepidoptera). Dotted vertical line represents photoreceptor excitation for the background.

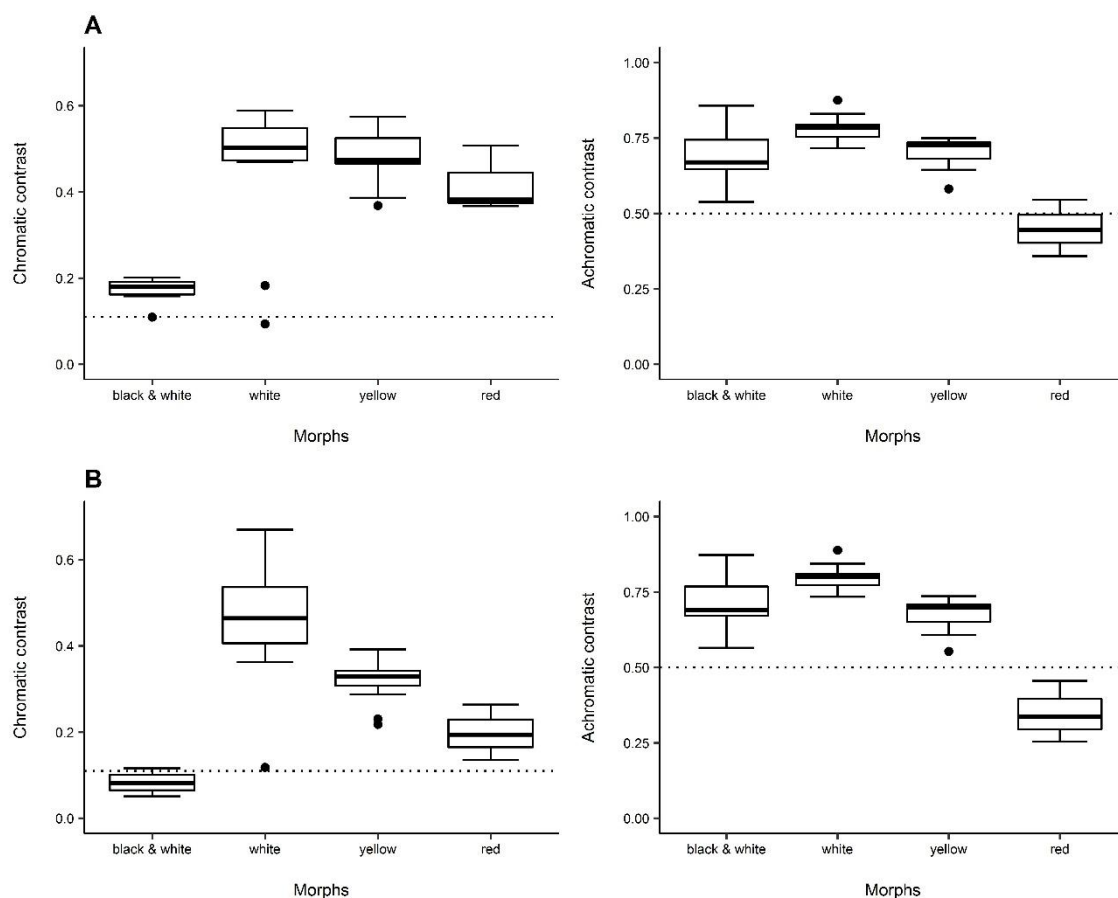

**Fig. 4.** Chromatic (left) and achromatic (right) contrasts of four *Gasteracantha cancriformis* morphs (black and white, N=6; white, N=10; yellow, N=13; and red, N=3) when viewed against a Brazilian savanna background by predators with distinct visual systems. (A) *Parus caeruleus* (Passeriformes). (B) *Philanthus triangulum* (Hymenoptera). Dotted vertical lines represent the discrimination thresholds for chromatic contrast (0.06) and photoreceptor excitation for background in achromatic contrast (0.5).
