1 **Orb-web spider color polymorphism through the eyes of**  
2 **multiple prey and predators**

3 Nathalia X. Gonçalves<sup>1,2</sup>, Felipe M. Gawryszewski<sup>1</sup>

4

5 <sup>1</sup>Evolution and Sensory Ecology Lab, Departamento de Genética, Instituto de Ciências  
6 Biológicas, Universidade Federal de Goiás, Campus Samambaia, Goiânia, GO, 74690-  
7 900, Brazil,

8 <sup>2</sup>Pós-Graduação em Ecologia e Evolução, Universidade Federal de Goiás, Campus  
9 Samambaia, Goiânia, GO, 74690-900, Brazil.

10 \*Author for correspondence (xg.nathalia@gmail.com)

11

12 Running title: Orb-web spider color polymorphism

13

14 Key words: *Gasteracantha cancriformis*; Araneidae; Visual communication;  
15 Aposematism; Luring; Prey attraction

16

17 Total word count: 4591

18 Abstract word count: 231

19 Introduction word count: 1268

20 Materials and methods word count: 1774

21 Results word count: 535

22 Discussion word count: 1137

23 Number of cited references: 69

24 Number of figures: 4

25 Number of tables: 1

26 Items to be published as online appendix: 4 tables

27

28 **Summary statement:** We assessed the role of both prey and predator vision on the  
29 evolution and maintenance of color polymorphism and color conspicuousness of the orb-  
30 web spider *Gasteracantha cancriformis* (Araneidae).

31

## 32 **ABSTRACT**

33 The sensory drive theory predicts that signals, sensory systems, and signaling behavior  
34 should coevolve. Variation in the sensory systems of prey and predators may explain the  
35 diversity of color signals, such as color polymorphism. The spider *Gasteracantha*  
36 *cancriformis* (Araneidae) possesses several conspicuous color morphs. The aim of the  
37 present study was to assess whether the color polymorphism of *G. cancriformis* may be  
38 maintained by pressure from multiple signal receivers, such as prey and predators with  
39 distinct color vision systems. In orb-web spiders, the prey attraction hypothesis states that  
40 conspicuous colors are prey lures that increase spider foraging success via flower mimicry.  
41 However, in highly defended species, conspicuous colors could also be a warning signal  
42 to predators. We used color vision modelling to estimate chromatic and achromatic  
43 contrast of *G. cancriformis* morphs as perceived by potential prey and predator taxa. Our  
44 results revealed that individual prey and predator taxa perceive the conspicuousness of  
45 morphs differently. For instance, the red morph is perceived as quite conspicuous to  
46 lepidopteran prey and avian predators, but not by dipteran prey and hymenopteran prey  
47 and predators. Therefore, the multiple prey and multiple predator hypotheses may  
48 explain the evolution of color polymorphism in *G. cancriformis*. However, the spider's  
49 coloration did not resemble flower coloration, which suggests that the species'  
50 conspicuousness is not the result of flower mimicry. Other parameters that are not  
51 evaluated by color vision models, such as distance, shape, angle, pattern geometry, and  
52 contour, could also affect the perception of color morphs by both prey and predators and  
53 thereby influence morph survival.

54

## 55 **INTRODUCTION**

56 The evolution and maintenance of color polymorphism have traditionally been attributed  
57 to apostatic selection (Clarke, 1979). Assuming that predators form a search image  
58 (Tinbergen, 1960), the advantage of rarity promotes the coexistence of multiple prey types

59 and stabilizes polymorphisms (Bond 2007). Nonetheless, other adaptive and non-adaptive  
60 explanations for the evolution and maintenance of color polymorphisms have been  
61 proposed (Gray and McKinnon, 2007). For instance, gene flow between populations with  
62 distinct phenotypes that are favored by natural selection could maintain polymorphism  
63 within populations (Farkas et al., 2013; Gray and McKinnon, 2007).

64 In the context of visual signaling, the distinct visual systems of prey and predators  
65 may play a role in the evolution and maintenance of color polymorphisms (Ruxton et al.,  
66 2004; White and Kemp, 2015). Animal communication involves the generation, emission  
67 and transmission of a signal, and processing of the signal by a receiver, in which an  
68 appropriate response is elicited (Endler 1993). Any factors that affect these steps can  
69 influence signal efficiency and, as a result, affect the direction of communication evolution  
70 (Endler 1993). Thus, the diversity of signals can be attributed to variation in the sensory  
71 systems of receivers. Considering that the same “color” may be perceived as cryptic or  
72 conspicuous by different species (Endler and Mappes 2004), each color morph of  
73 polymorphic populations may represent an adaptation to particular visual systems of prey  
74 or predator species (Endler, 1992; Ruxton et al., 2004; White and Kemp, 2015).

75 Many orb-web spiders exhibit conspicuous coloration. The prey attraction  
76 hypothesis states that the bright coloration of some spiders lures insects, possibly by  
77 mimicking flower coloration (e.g. Craig and Ebert, 1994; Hauber, 2002). The hypothesis  
78 has been empirically tested several times, and most studies have found support for it. The  
79 polymorphic *Nephila pilipes* (Nephilidae) present a melanic and a bright colored morph  
80 (Tso et al., 2004). The bright color patterns of this species are thought to resemble  
81 symmetric flower patterns that may attract bees, owing to the innate preference of bees  
82 for symmetry (Chiao et al., 2009). Moreover, yellow patches on the spider’s body may be  
83 perceived as food resources by flowers visitors (Tso et al. 2004). Besides being attractive  
84 to pollinators, the yellow patches on the species’ body also seems to attract hymenopteran  
85 predators. Therefore, it is possible that there is a trade-off between foraging success and  
86 predation risk in polymorphic populations in which some morphs are more cryptic than  
87 others (Fan et al. 2009).

88 The predators of orb-web spiders possess very distinct visual systems. Birds, for  
89 example, are tetrachromats, whose photoreceptors are most sensitive to ultraviolet-violet,

90 blue, green, and red (Hart 2001), whereas spider hunting wasps, such as members of the  
91 Sphecidae, are trichromats, whose photoreceptors are most sensitive to ultraviolet, blue,  
92 and green (Peitsch, 1992; Briscoe and Chittka, 2001). Similarly, the insect prey of orb-web  
93 spiders also vary in their types of color vision. For example, bees are trichromats with  
94 spectral sensitivities that are similar to those of sphecid wasps (Briscoe and Chittka, 2001),  
95 whereas some lepidopterans are tetrachromats, and some dipterans possess  
96 photoreceptors with five different sensitivity peaks (Schnaitmann et al., 2013). Therefore,  
97 the maintenance of spider color polymorphism may result not only from a trade-off  
98 between prey attraction and capture success but also from selective pressure from multiple  
99 receivers (Endler, 1992; Ruxton et al., 2004; White and Kemp, 2015). Color perception  
100 depends on both the signal reflectance and observer visual system, as well as on the  
101 background reflectance spectrum and ambient light intensity (Endler 1990). Physiological  
102 models of color vision include all these factors and have been effective for objectively  
103 studying animal coloration (i.e., independent of human subjective assessment; Renoult,  
104 2015).

105         The orb-web spider *G. cancriformis* constructs large webs and rests in the web  
106 hub during the day (Levi, 1978). Females of the species possess a hard abdomen with  
107 three pairs of spines and vary in color, with some morphs quite conspicuous to human  
108 observers (Levi, 1978; Gawryszewski and Motta, 2012). The ventral side of females are  
109 mostly black, sometimes with small bright spots. In one studied population, the dorsal  
110 side of females possessed black or reddish spines and four different color patterns: yellow,  
111 white, red, and a combination of black and white (Gawryszewski 2007; Gawryszewski and  
112 Motta, 2012). Adult females measure from 5 to 7 mm in length and 10 to 13 mm in width  
113 (Muma, 1971), whereas the males are brownish, small, and do not exhibit chromatic  
114 variation (Levi, 1978). The prey attraction hypothesis does not seem to explain the  
115 coloration of the orb-web spider *Gasteracantha cancriformis* (Araneidae), since both  
116 naturally bright morphs and yellow-painted individuals failed to capture more prey than  
117 either naturally cryptic morphs or black-painted individuals (Gawryszewski and Motta,  
118 2012). Although evidence is still needed, Edmunds and Edmunds (1983) suggested that  
119 the conspicuous body coloration of *Gasteracantha* spiders might serve as a warning signal  
120 to predators. The aim of the present study was to investigate three hypotheses for the

121 evolution and maintenance of color polymorphism, using *G. cancriformis* as a model.  
122 Two derivations from the prey attraction hypothesis include (1) the *multiple prey*  
123 *hypothesis*, which posits that color morphs are perceived differently by different prey taxa  
124 and that each color morph is adapted to lure a specific type of prey, and (2) the *multiple*  
125 *mimic model* hypothesis, which posits that the spiders attract prey *via* aggressive mimicry  
126 of flower colors and that each color morph mimics a different flower color. In addition,  
127 (3) the *multiple predator hypothesis* posits that the conspicuous colors found in spiders  
128 could serve as warning signals to predators and that color polymorphism could evolve  
129 and be maintained if each color morph is adapted to the vision of a specific predator.

130

## 131 MATERIALS AND METHODS

### 132 Color vision model

133 To estimate the perception of *G. cancriformis* color morphs by distinct predators and  
134 prey groups, we used the color vision model proposed by Chittka (1992). Although this  
135 model has been only validated with behavioral experiments on honeybees, its general  
136 form allow us to apply it for other taxa (e.g. They and Casas 2002). The model requires  
137 four inputs: (1) the irradiance reaching the observed object, (2) the observer  
138 photoreceptor excitation curves, (3) the background reflectance to which photoreceptors  
139 are adapted to, and (4) the reflectance curve of the observed object. First, the sensitivity  
140 factor  $R$  was determined for each photoreceptor, as follows:

$$R = 1 / \int_{700}^{300} I_B(\lambda) S(\lambda) D(\lambda) d\lambda \quad (1)$$

141 where  $I_B(\lambda)$  is the spectral reflectance function of the background,  $S(\lambda)$  is the spectral  
142 sensitivity function of each photoreceptor, and  $D(\lambda)$  is the illuminant irradiance spectrum.  
143 Secondly, the quantum flux  $P$  (relative amount of photon catch) is calculated, as follows:

$$P = R \int_{700}^{300} I_S(\lambda) S(\lambda) D(\lambda) d\lambda \quad (2)$$

144 where  $I_S(\lambda)$  is the spectral reflectance function of the stimulus. Assuming that the maximum  
145 excitation of a photoreceptor is 1, the phototransduction process is determined by:

$$E = P / (P + 1) \quad (3)$$

146 Stimuli spectra are projected in specific color spaces. The coordinates of each  
147 spectrum are calculated using photoreceptor excitations, as follows (Chittka et al. 1994):

$$X1 = \sin 60^\circ (E_3 - E_1) \quad (4)$$

$$X2 = E_2 - 0.5 (E_1 + E_3) \quad (5)$$

148 For tetrachromat organisms (Théry and Casas, 2002):

$$X1 = \frac{2\sqrt{2}}{3} \cos 30^\circ (E_3 - E_4) \quad (6)$$

$$X2 = E_1 - \frac{1}{3} (E_2 + E_3 + E_4) \quad (7)$$

$$X3 = \frac{2\sqrt{2}}{3} [\sin 30^\circ (E_3 + E_4) - E_2] \quad (8)$$

149 We extended the model of Chittka (1992) to accommodate pentachromatic organisms, as  
150 follows:

$$X1 = \frac{5}{2\sqrt{2}\sqrt{5}} (E_2 - E_1) \quad (9)$$

$$X2 = \frac{5\sqrt{2}}{2\sqrt{3}\sqrt{5}} [E_3 - \left(\frac{E_1 + E_2}{2}\right)] \quad (10)$$

$$X3 = \frac{5\sqrt{3}}{4\sqrt{5}} [E_4 - \left(\frac{E_1 + E_2 + E_3}{3}\right)] \quad (11)$$

$$X4 = E_4 - \left(\frac{E_1 + E_2 + E_3 + E_4}{4}\right) \quad (12)$$

151 Chromatic contrast between a color stimulus and background, or between two  
152 color stimuli, is calculated as the Euclidean distance ( $\Delta S$ ) between two points in color  
153 space, as follows:

$$S = \sqrt{\sum_{i=1}^n (X_{a_i} - X_{b_i})^2} \quad (13)$$

154 where  $X_i$  ( $i = 1, 2, 3, \dots, n$ ) represents the coordinate in the color space.

155 The color spaces are chromaticity diagrams and, thus, do not estimate the  
156 achromatic contrast between objects. Nonetheless, achromatic contrasts can be important

157 visual cues used by both prey and predators. In bees, achromatic contrast is more  
158 important than chromatic cues for objects that subtend a visual angle smaller than  $\sim 15^\circ$ ,  
159 which means that bees have to be very close to flowers in order to use their color vision  
160 for discrimination tasks (Giurfa et al., 1997). Similarly, birds use achromatic contrast in  
161 detection of small objects (Osorio et al., 1999). We estimated the achromatic contrast as  
162 the excitation (Eq. 3) of the photoreceptor responsible for achromatic discrimination in  
163 each organism (Chittka and Kevan 2005).

164 For our modeling, we used the reflectance data of *G. cancriformis* color morphs  
165 that was collected during a previous study (for reflectance curves see figure 1.8 in  
166 Gawryszewski, 2007, and figure 5 in Gawryszewski and Motta 2012). These data have  
167 already been used to estimate the visual contrast of the yellow and white morphs and the  
168 black and white morphs from the perspective of *Apis mellifera* (Gawryszewski and Motta  
169 2012). The spiders were collected from a Brazilian savanna physiognomy, namely  
170 Cerrado *sensu stricto*, which is characterized by shrubs and trees of 3 to 8 m tall that are  
171 contorted and possess thick, fire-resistant bark, a crown cover of  $>30\%$ , and additional  
172 herbaceous vegetation (Oliveira-Filho and Ratter 2002). The background reflectance was  
173 estimated from the average reflectance of leaves, leaf litter, bark, and grasses that were  
174 collected from the same area as the spiders (see figure 5 in Gawryszewski and Motta,  
175 2012). To avoid issues with negative values and unrealistic positive values we adjusted the  
176 reflectance data by subtracting the reflectance values by the minimum value of each  
177 measurement. As illuminant spectrum, we used the International Commission on  
178 Illumination (CIE) standard illuminant of D65, which is comparable to open areas, such  
179 as the Brazilian savanna (Chittka, 1996).

180

### 181 **Multiple prey hypothesis**

182 Using the model described above, we estimated the chromatic and achromatic  
183 conspicuousness of the *G. cancriformis* morphs (yellow, white, red, and white parts of the  
184 black and white morph) to a suit of potential prey: *A. mellifera* (Hymenoptera, Apidae),  
185 *Drosophila melanogaster* (Diptera, Drosophilidae), and *Fabriciana adippe* (Lepidoptera,  
186 Nymphalidae). We selected these insect orders because they are commonly intercepted  
187 by orb-webs in field experiments (Craig and Ebert 1994; Tso et al. 2002) and represent

188 the diversity of visual systems among insects (Briscoe and Chittka, 2001). For *A. mellifera*  
189 and *D. melanogaster*, we used photoreceptor sensitivity curves from the literature (Peitsch  
190 et al., 1992; Schnaitmann et al., 2013). It was recently shown that, together with R7-R8  
191 photoreceptors, R1-R6 photoreceptors contribute to color vision in *D. melanogaster*  
192 (Kelber and Henze, 2013; Schnaitmann et al., 2013). Therefore, we included the R1-R6  
193 photoreceptor curve, treating *D. melanogaster* as a pentachromat. The graphical curves  
194 were extracted directly from the figures of relevant publications using DataThief III  
195 version 1.7 (Tummers, 2006). For *Fabriciana adippe*, however, no photoreceptor  
196 sensitivity curves are available, so electrophysiological measurements of photoreceptor  
197 sensitivity peaks ( $\lambda_{\max}$ ; Eguchi et al., 1982) were used to estimate the photoreceptor curves  
198 (for details see Govardovskii et al., 2000).

199 For achromatic contrast, bees only use the green photoreceptor (Giurfa et al.,  
200 1996), whereas flies only use the outer photoreceptors (R1-R6; Kelber & Henze, 2013).  
201 Because the exact mechanism used by lepidopterans for achromatic discrimination is  
202 incompletely understood, we assumed that they employ the same mechanism as in bees.  
203 The color hexagon model assumes that photoreceptors respond to half their maximum  
204 for the background they are adapted to, so that the photoreceptor excitation for  
205 background is equivalent to 0.5 units (Chittka, 1992).

206 The multiple prey hypothesis predicts that different prey taxa perceive color  
207 morphs differently. To assess whether each spider morph was perceived differently by  
208 prey species, we constructed two linear mixed models, one for chromatic contrast and  
209 one for achromatic contrast. Either chromatic ( $\Delta S$ ) or achromatic contrast were used as  
210 the dependent variable, and spider morph and prey taxon were used as the independent  
211 variables (contrast = spider morph  $\times$  observer). The spider morph was defined as yellow,  
212 white, red, or black and white, and the observers were defined as hymenopteran,  
213 dipteran, or lepidopteran. Individual spiders were used as random effects. Normality and  
214 homogeneity were verified by visual inspection of quantile-quantile and residuals vs. fitted  
215 values plots. We computed all nested models and used the Akaike Information Criterion  
216 to select the best model.

217 As a reference point, we used a color discrimination threshold of  $\Delta S = 0.11$ , which  
218 is the threshold value below which trained bees are unable to distinguish different flower



219 colors (Chittka, 1996). However, discrimination thresholds are variable and can change  
220 depending on the study species, learning conditions, previous experience, background  
221 coloration, whether the task involves discrimination between colors or detection against  
222 the background, and whether objects are compared sequentially or simultaneously  
223 (Avarguès-Weber & Giurfa, 2014). It should also be noted that threshold values were not  
224 behaviorally validated for other taxa. Therefore, values originated here using the Chittka  
225 model (1992) must be taken carefully.

226

### 227 **Multiple mimic models hypothesis**

228 To test the multiple mimic models hypothesis, we compared how flowers and spider  
229 morphs are perceived by prey. We gathered all flower reflectance data available in the  
230 Floral Reflectance Database (FReD; Arnold et al., 2010), excluding reflectance data from  
231 lower flower parts, leaves, bracts, stamens, the inner parts of bell-shaped flowers, and  
232 unknown items, as well as spectrum files that did not cover 300 to 700 nm. Most species  
233 in the database have only one reflectance spectrum, and for species with multiple  
234 reflectance spectra, we randomly selected a single spectra. We did not average the  
235 reflectance of these species because there was no information available on whether these  
236 measurements referred to different individuals or different parts of single flowers. In total,  
237 we gathered reflectance data from 859 plant species.

238 We calculated a matrix of chromaticity distances between average color loci of  
239 each spider color morph and each individual flowers species and plotted these values  
240 using a Kernel density estimation. If spiders are mimicking some group of flower colors,  
241 we would expect to find at least one peak near or below the theoretical detection threshold  
242 of 0.11. We also followed the same procedure for the absolute achromatic difference  
243 between individual flowers and the mean achromatic value for each color morph. If  
244 spiders and flowers are similar in the achromatic dimension, we would expect to find one  
245 peak near zero.

246

### 247 **Multiple predator hypothesis**

248 The methodology used to investigate the multiple predator hypothesis methodology was  
249 very similar to that used for the multiple prey hypothesis, except that we used predator

250 species in our models. As predators, we considered the bird *Parus caeruleus* (Paridae)  
251 and the wasp *Philanthus triangulum* (Sphecidae), since birds and wasps are the main  
252 predators of orb-web spiders (Rayor, 1996; Foelix, 2010), are visually guided hunters, and  
253 have distinct color vision systems. For *P. caeruleus*, we used photoreceptor sensitivity  
254 curves available in the literature (Hart, 2001), and for *P. triangulum*, we used  
255 photoreceptor sensitivity peaks to estimate photoreceptor sensitivity curves (data available  
256 in Briscoe and Chittka, 2001; see Govardovskii et al. 2000 for estimation of sensitivity  
257 curves from sensitivity peaks).

258         The multiple predator hypothesis predicts that different predator taxa perceive  
259 color morphs differently. To assess this prediction, we established two linear mixed  
260 models, one for chromatic contrast and one for achromatic contrast. Either chromatic ( $\Delta$   
261 S) or achromatic contrast were used as the dependent variable, and spider morph and  
262 predator taxon were used as the independent variables (contrast = spider morph  $\times$   
263 observer). The spider morph was defined as yellow, white, red, or black and white, and  
264 individual spiders were used as random effects. Normality and homogeneity were verified  
265 by visual inspection of quantile-quantile and residuals vs. fitted values plots. We computed  
266 all nested models and used the Akaike Information Criterion to select the best model.

267         As in the multiple prey hypothesis, we used discrimination thresholds as reference  
268 points. For the chromatic contrast, we considered color discrimination thresholds of  $\Delta S =$   
269 0.11 and  $\Delta S = 0.06$  for the wasp (Dyer and Chittka, 2004) and bird (Théry et al., 2005),  
270 respectively. For the achromatic contrast, we considered double cones in birds (Hart,  
271 2001), and assumed green photoreceptors for wasps, as in bees.

272         Visual modeling calculations were conducted using the ‘colourvision’ R package  
273 (Gawryszewski, 2017). Linear mixed models were performed using the ‘nlme’ package  
274 (Pinheiro et al., 2016), and graphs were plotted using the ‘ggplot2’, ‘ggExtra’, and  
275 ‘gridExtra’ packages (Wickham, 2009; Attali, 2016; Auguie, 2016; R Core Team, 2015).

276

## 277 **RESULTS**

### 278 **Multiple prey hypothesis**

279 For chromatic contrast, the model that included the interaction between spider morph  
280 and prey taxon presented the lowest AIC value (Table 1). The yellow morph presented

281 the highest  $\Delta S$  value for *A. mellifera* and *F. adippe* vision, whereas the white spider  
282 presented the highest  $\Delta S$  value for *D. melanogaster*, followed by the yellow morph (Fig.  
283 1). The white patch of the black and white spiders presented a  $\Delta S$  value that was very  
284 close to the theoretical discrimination threshold for all prey species (Fig. 1). The red  
285 spiders presented  $\Delta S$  values near the theoretical discrimination threshold for *A. mellifera*  
286 and *D. melanogaster*, but not for *F. adippe* (Fig. 1). For prey achromatic contrast, the  
287 model that included the interaction between variables presented the lowest AIC value  
288 (Table 1). For all prey groups, the white morph had the highest excitation value, followed  
289 by the black and white, yellow, and red morphs, respectively (Fig. 1). The model  
290 coefficients are provided in the supplementary material (Table S1 and S2).

291

### 292 **Multiple mimic models hypothesis**

293 For all three prey species, only the white patch of the black and white morph had a density  
294 peak near the chromatic theoretical discrimination threshold of 0.11 when compared to  
295 all flower reflectance spectra: 44.5% for *A. mellifera*, 16.8% for *D. melanogaster*, and 35%  
296 for *F. addipe*. (Fig. 2). For the other spider morphs only a small proportion of the  
297 Euclidean distances between flowers and morphs presented values  $< 0.11$ . For *A. mellifera*  
298 only 1.6% of yellow morphs presented values lower than 0.11, 3.4% of white morphs, and  
299 4.8% of red morphs (Fig. 2). For *D. melanogaster* only 2.4% of yellow morphs had values  
300 lower than 0.11, 4.0 % of white spiders, and 3.0% of red morphs (Fig. 2). For *F. addipe* this  
301 values were 0.4%, 0.2%, and 0.5% respectively (Fig. 2). For all three prey species a large  
302 proportion of flowers had similar achromatic values to the yellow morph, white morph,  
303 and the white patch of the black and white morph, but not to the red morph (Fig. 3).

304

### 305 **Multiple predator hypothesis**

306 For the chromatic contrast, the model with interaction between variables presented the  
307 lowest AIC value (Table 1). The black and white morph presented the lowest  $\Delta S$  value  
308 for both predators (Fig. 4A,B; Table S3). The yellow morph was the one with highest  $\Delta S$   
309 value for *P. caeruleus*, though white and red morphs presented similar values (Fig. 4A).  
310 For *P. triangulum*, the white spider morph presented the highest  $\Delta S$  value, followed by  
311 the yellow and red morphs, and the red morph was near the theoretical discrimination

312 threshold of 0.11 (Fig. 4B). For the achromatic contrast, the model that included the  
313 interaction between variables presented the lowest AIC value (Table 1), even though the  
314 values of the two predator species were very similar. For *P. caeruleus*, the white morph  
315 had the highest excitation value, followed by the yellow, black and white, and red morphs,  
316 respectively (Fig. 4C). The white morph also had the highest excitation value for *P.*  
317 *triangulum*, followed by the black and white, yellow, and red morphs, respectively (Fig.  
318 4D). The model coefficients are provided in the supplementary material (Table S3 and  
319 S4).

320

## 321 DISCUSSION

322 Our statistical analyses suggested that the multiple prey and multiple predator hypotheses  
323 are plausible explanations for the evolution of color polymorphism in *G. cancriformis*,  
324 but provided poor support to the flower mimicry hypothesis. If conspicuous colors in orb-  
325 web spider attracts prey, then polymorphism may occur in luring systems by multiple  
326 mimic models that act as sensory traps for particular prey taxa. Conversely, polymorphism  
327 may occur as a result of multiple receiver biases, where each morph lures specific prey  
328 taxa that possess specific sensory, neural, or perceptual biases (White and Kemp, 2015).  
329 In *G. cancriformis*, spider morphs conspicuousness is perceived differently by prey  
330 species. The yellow and white morphs were the most conspicuous to all prey taxa. The  
331 former being more contrasting from the background for honeybee color vision, and the  
332 latter, for flies. Whereas, the red morph, although inconspicuous for honeybee and flies,  
333 showed high detectability for butterflies. Yellow spider morphs could experience higher  
334 foraging success as a result of insects preference for yellow signals. Yellow pollen and  
335 yellow flower centers, both of which are likely adapted to insect visual systems, are among  
336 the most common traits of floral color patterns (Papiorek et al., 2016; Lunau, 2000). On  
337 the other hand, red morphs are conspicuous to lepidopterans and may be effective for  
338 attracting them. Another recent study also using color vision models showed that insects  
339 prey perceive coloration of *Verrucosa arenata* morphs differently, and they may be a  
340 selective pressure on the evolution of these color patterns variation (Ajuria-Ibarra et al.  
341 2017). Therefore, the distinct perceptions of insect taxa support the multiple prey

342 hypothesis as a mechanism for the evolution of color polymorphism in stationary  
343 predators.

344 For the achromatic dimension, the statistical analyses also suggested an interaction  
345 between spider morph and prey taxon. However, there was very little difference between  
346 the morphs when viewed by different prey. Therefore, the differences in achromatic  
347 contrast between prey perception may be statistically significant but not biologically  
348 relevant. A recently proposed scenario for the evolution of color polymorphism is that  
349 different morphs exploit different visual channels in prey. The yellow morphs of *G.*  
350 *fornicata* would benefit from stimulating the dipteran chromatic channel, whereas white  
351 morphs would benefit from stimulating the achromatic channel (White and Kemp, 2016).  
352 However, this is inconsistent with *G. cancriformis* because the spider morphs presented  
353 similar levels of achromatic detectability by all the prey taxa examined.

354 Several authors have proposed flower mimicry as a mechanism of prey attraction  
355 by orb-web spiders *via* conspicuous body coloration (e.g. Craig and Ebert, 1994; Hauber,  
356 2002). However, the hypothesis has seldom been tested. Our density graphs show that the  
357 color of most of the *G. cancriformis* morphs was not similar to any group of flowers, which  
358 suggests that the coloration of the *G. cancriformis* did not result from flower mimicry.  
359 Conversely, a study of various orb-web spider species that also used color vision models  
360 found that, as perceived by dipterans and hymenopterans, the colors of spiders are very  
361 similar to those of flowers (White et al., 2016). It is tempting to use correlational data to  
362 infer causal relationships, however, this finding may only reflect the diversity of flower  
363 colors and spider colors. Color vision modelling of the prey of the orchid mantis  
364 (*Hymenopus coronatus*) suggested that pollinators are unable to distinguish the colors of  
365 the mantis and flowers, and a field experiment showed that the mantis actually attracts  
366 more pollinators than flowers (O'Hanlon et al., 2013). However, the modification of non-  
367 color mantis traits suggested that other types of flower mimicry, such as symmetry,  
368 contrasting color patterns, and morphological similarities to flower petals, had no effect  
369 on prey attraction (O'Hanlon, 2014). Therefore, mantis coloration is effective in attracting  
370 prey, but may not result from flower mimicry. Instead, it may result from sensory  
371 exploitation (O'Hanlon, 2014).

372           The results of the present study also support the multiple predator hypothesis for  
373 the maintenance of color polymorphism in *G. cancriformis*, as the spider morphs  
374 conspicuousness was perceived differently by predator species in both the chromatic and  
375 achromatic dimensions. The red morph could be targeting bird predators but would  
376 appear relatively inconspicuous to a hymenopteran predator. In contrast, the white and  
377 yellow morphs are highly detectable by both predator taxa. The colors of two of the four  
378 *G. cancriformis* morphs (yellow and red) are typical of aposematic species (Endler and  
379 Mappes, 2004). Conspicuous coloration is especially advantageous when it increases the  
380 mismatch with the background and facilitates predator learning (Endler and Greenwood,  
381 1988). Spiders of the genus *Gasteracantha* possess spines and a hard abdomen. Moreover,  
382 the hunting wasp *Sceliphron laetum* avoids provisioning initial instars with *Gasteracantha*  
383 spiders (Elgar and Jebb, 1999). Morphological and behavioral defenses that make  
384 ingestion difficult may also constitute an aposematic signal, along with the species' bright  
385 colors, which enhance predator memory and learning (Endler and Greenwood, 1988;  
386 Ruxton et al., 2004). Though aposematism is not commonly reported in spiders (Oxford  
387 and Gillespie, 1998), Brandley et al. (2016) conducted an experiment with black widow  
388 models and found that models with red markings were more likely to be avoided by birds  
389 than all black models. If spider morphs are conspicuous to prey but do not resemble  
390 flowers, it is possible that the conspicuousness of *G. cancriformis* reflects a trade-off  
391 between an antipredatory strategy and foraging success, in which common spiders  
392 morphs would be avoided by prey.

393           Thermoregulation is another possible explanation for color polymorphism in orb-  
394 web spiders. In *Verrucosa arenata* (Araneidae), yellow and white morphs exhibited  
395 different thermal responses when exposed to artificial heat. The white morphs absorbed  
396 less visible radiation and shorter wavelengths than the yellow morphs, which could protect  
397 the spiders' internal tissue from the harmful effects of UV radiation (Rao and Mendoza-  
398 Cuenca, 2016). However, absorbing pigments are likely to offer protection against UV  
399 damage (Gawryszewski et al., 2015), which is analogous to the melanin found in the  
400 human epidermis (Brenner and Hearing, 2008) and commercial sunscreen lotions  
401 (Antoniou et al., 2008).

402 We only considered chromatic and achromatic discrimination, but color pattern  
403 geometry, shape, contour, size, angle, texture, and distance of visual detection  
404 (Troscianko et al., 2009) may also influence the behavior of both prey and predators  
405 toward spiders since different species use distinct visual cues for stimuli detection and  
406 recognition (Théry and Gomez, 2010). Furthermore, color vision models do not include  
407 other perceptual mechanisms, such as cognition, color categorization, past experiences,  
408 or memory imprecision (Renoult et al., 2015), even though these factors may affect  
409 detectability and, consequently, influence the survival rate of morphs in different ways  
410 (Théry and Gomez, 2010). Additionally, non-adaptive explanations, such as  
411 overdominance and allele equilibrium in absence of selection, are often ignored when  
412 studying polymorphisms in an ecological perspective. Finally, predation experiments and  
413 field experiments that evaluate the prey taxa caught by the different spider morphs are  
414 paramount to validate and complement the findings of the present study.

415

#### 416 **Acknowledgments**

417 We thank CAPES for financial support (CAPES/PROEX), and for a scholarship awarded  
418 to NXG.

419

#### 420 **Competing interests**

421 No competing interests declared.

422

#### 423 **Funding**

424 This work was supported by CAPES - Brazilian Federal Agency for Support and  
425 Evaluation of Graduate Education within the Ministry of Education of Brazil.

426

#### 427 **References**

428

429 Ajuria-Ibarra H, Tapia-McClung H, Rao D (2017) Mapping the variation in spider body  
430 colouration from an insect perspective. *Evol Ecol* 1–19. doi: 10.1007/s10682-017-9904-

431

- 432 Antoniou C, Kosmadaki MG, Stratigos AJ, Katsambas AD (2008) Sunscreens—what's  
433 important to know. *J. Eur. Acad. Dermatol Venereol* 22(9): 1110-1119. Doi:  
434 10.1111/j.1468-3083.2008.02580.x.
- 435 Arnold SEJ, Faruq S, Savolainen V, McOwan PW, Chittka L (2010) FReD: The Floral  
436 Reflectance Database – A Web Portal for Analyses of Flower Colour. *PLoS ONE*  
437 5(12): e14287. doi:10.1371/journal.pone.0014287.
- 438 Avarguès-Weber A, Giurfa M (2014) Cognitive components of color vision in honey bees:  
439 how conditioning variables modulate color learning and discrimination. *J. Comp*  
440 *Physiol A* 200(6): 449-461. Doi: 10.1007/s00359-014-0909-z
- 441 Attali D (2016) R package ‘ggExtra’: Add marginal histograms to ‘ggplot2’, and more  
442 ‘ggplot2’ enhancements (version 0.6). <https://CRAN.R-project.org/package=ggExtra>
- 443 Auguie B (2016) R package ‘gridExtra’: Miscellaneous functions for “grid” graphics  
444 (version 2.2.1). <https://CRAN.R-project.org/package=gridExtra>
- 445 Bond AB (2007) The Evolution of Color Polymorphism: Crypticity, Searching Images,  
446 and Apostatic Selection. *Annu Rev Ecol Evol Syst* 38:489–514. doi:  
447 10.1146/annurev.ecolsys.38.091206.095728
- 448 Brandley N, Johnson M, Johnsen S (2016) Aposematic signals in North American black  
449 widows are more conspicuous to predators than to prey. *Behav Ecol* p.arw014. doi:  
450 10.1093/beheco/arw014
- 451 Brenner M, Hearing VJ (2008) The protective role of melanin against UV damage in  
452 human skin. *Photochem and photobiol* 84(3): 539-549. doi: 10.1111/j.1751-  
453 1097.2007.00226.x
- 454 Briscoe AD, Chittka L (2001) The evolution of color vision in insects. *Annu Rev Entomol*  
455 46:471–510. doi: 10.1146/annurev.ento.46.1.471
- 456 Chiao C-C, Wu W-Y, Chen S-H, Yang E-C (2009) Visualization of the spatial and spectral  
457 signals of orb-weaving spiders, *Nephila pilipes*, through the eyes of a honeybee. *J*  
458 *Exp Biol* 212:2269–78. doi: 10.1242/jeb.030734
- 459 Chittka L (1992) The colour hexagon: a chromaticity diagram based on photoreceptor  
460 excitations as a generalized representation of colour opponency. *J Comp Physiol*  
461 *A* 170(5):533-543. doi: 10.1007/BF00199331



- 462 Chittka L (1996) Optimal sets of color receptors and color opponent systems for coding  
463 of natural objects in insect vision. *J Theor Biol* 181(2):179-196. doi:  
464 10.1006/jtbi.1996.0124
- 465 Chittka L, Kevan PG (2005) Flower colour as advertisement. *Pract Pollinat Biol* 157–230.  
466 doi:
- 467 Chittka L, Shmida A, Troje N, Menzel R (1994) Ultraviolet as a component of flower  
468 reflections, and the colour perception of hymenoptera. *Vision Res* 34:1489–1508.  
469 doi: 10.1016/0042-6989(94)90151-1
- 470 Clarke BC (1979) The evolution of genetic diversity. *Proc R Soc Lond* 205:453-474. doi:  
471 10.1098/rspb.1979.0079
- 472 Craig CL, Ebert K (1994) Colour and Pattern in Predator–Prey Interactions: The Bright  
473 Body Colours and Patterns of a Tropical Orb-Spinning Spider Attract Flower-  
474 Seeking Prey. *Funct Ecol* 8:616–620. doi: 10.2307/2389923
- 475 Dyer AG, Chittka L (2004) Fine colour discrimination requires differential conditioning  
476 in bumblebees. *Naturwissenschaften* 91(5):224-227. doi: 10.1007/s00114-004-0508-x
- 477 Edmunds J, Edmunds M (1983) The defensive mechanisms of orb weavers (Araneae:  
478 Araneidae) in Ghana, West Africa. In: *Proc 9th Int Cong Arachnol, Panama* 73-89.
- 479 Eguchi E, Watanabe K, Hariyama T, Yamamoto K (1982) A comparison of  
480 electrophysiologically determined spectral responses in 35 species of Lepidoptera. *J*  
481 *Insect Physiol* 28:675–682. doi: 10.1016/0022-1910(82)90145-7
- 482 Elgar MA, Jebb M (1999) Nest provisioning in the mud-dauber wasp *Sceliphron laetum*  
483 (F. Smith): Body mass and taxa specific prey selection. *Behaviour* 136:147-159. doi:  
484 10.1163/156853999501252
- 485 Endler JA (1990) On the measurement and classification of colour in studies of animal  
486 colour patterns. *Biol J Linn Soc* 41:315–352. doi: 10.1111/j.1095-8312.1990.tb00839.x
- 487 Endler JA (1992) Signals, signal conditions, and the direction of evolution. *Am Nat* S125-  
488 S153. doi: 10.1086/285308
- 489 Endler JA (1993) Some general comments on the evolution and design of animal  
490 communication systems. *Philos Trans R Soc B Biol Sci* 340:215–225. doi:  
491 10.1098/rstb.1993.0060

- 492 Endler JA, Greenwood J (1988) Frequency-dependent predation, crypsis and aposematic  
493 coloration [and Discussion]. *Philos Trans R Soc Lond B* 319:505-523. doi:  
494 10.1098/rstb.1988.0062
- 495 Endler JA, Mappes J (2004) Predator mixes and the conspicuousness of aposematic  
496 signals. *Am Nat* 163:532–547. doi: 10.1086/382662
- 497 Fan CM, Yang EC, Tso IM (2009) Hunting efficiency and predation risk shapes the color-  
498 associated foraging traits of a predator. *Behav Ecol* 20:808–816. doi:  
499 10.1093/beheco/arp064
- 500 Farkas TE, Mononen T, Comeault AA, Hanski I, Nosil P (2013) Evolution of camouflage  
501 drives rapid ecological change in an insect community. *Curr Biol* 23(19):1835-1843.  
502 doi: 10.1016/j.cub.2013.07.067
- 503 Foelix RF (2010) *Biology of Spiders*. Oxford: Oxford University Press. doi:  
504 10.1163/187631283X00371
- 505 Gawryszewski FM (2007) Policromatismo e stabilimentum em *Gasteracantha cancriformis*  
506 (*Araneae, Araneidae*): caracterização e as hipóteses da atração de presas e da  
507 proteção da teia. Masters Thesis, Universidade de Brasília.
- 508 Gawryszewski FM (2017) Colour vision models: a practical guide, some simulations, and  
509 colourvision R package. bioRxiv. doi: [10.1101/103754](https://doi.org/10.1101/103754), R package version  
510 1.1, <http://eselab.weebly.com>.
- 511 Gawryszewski FM, Motta PC (2012) Colouration of the orb-web spider *Gasteracantha*  
512 *cancriformis* does not increase its foraging success. *Ethol Ecol Evol* 24:23–38. doi:  
513 10.1080/03949370.2011.582044
- 514 Gawryszewski FM, Birch D, Kemp D, Herberstein ME (2015) Dissecting the variation of  
515 a visual trait: the proximate basis of UV-Visible reflectance in crab spiders  
516 (*Thomisidae*). *Funct Ecol* 29(1):44-54. doi: 10.1111/1365-2435.12300
- 517 Giurfa M, Vorobyev M, Kevan P, Menzel R (1996) Detection of coloured stimuli by  
518 honeybees: minimum visual angles and receptor specific contrasts. *J Comp Physiol*  
519 *A* 178(5):699-709. doi: 10.1007/BF00227381
- 520 Giurfa M, Vorobyev M, Brandt R, Posner B, Menzel R (1997) Discrimination of coloured  
521 stimuli by honeybees: alternative use of achromatic and chromatic signals. *J Comp*  
522 *Physiol A* 180:235–243. doi: 10.1007/s003590050044

- 523 Govardovskii VI, Fyhrquist N, Reuter T, Kuzmin DG, Donner K (2000) In search of the  
524 visual pigment template. *Vis Neurosci* 17:509–528. doi: 10.1017/S0952523800174036
- 525 Gray SM, McKinnon JS (2007) Linking color polymorphism maintenance and speciation.  
526 *Trends Ecol Evol* 22:71–79. doi: 10.1016/j.tree.2006.10.005
- 527 Hart NS (2001) The visual ecology of avian photoreceptors. *Prog Retin Eye Res* 20:675–  
528 703. doi: 10.1016/S1350-9462(01)00009-X
- 529 Hauber ME (2002) Conspicuous colouration attracts prey to a stationary predator. *Ecol*  
530 *Entomol* 27:686 - 691. doi: 10.1046/j.1365-2311.2002.00457.x
- 531 Kelber A, Henze MJ (2013) Colour vision: Parallel pathways intersect in *Drosophila*. *Curr*  
532 *Biol* 23(23):R1043-R1045. doi: 10.1016/j.cub.2013.10.025
- 533 Levi HW (1978) The American orb-weaver genera *Colpopeira*, *Micrathena* and  
534 *Gasteracantha* North of Mexico (Araneae, Araneidae). *Bull Mus Comp Zool*  
535 148:417-442.
- 536 Lunau K (2000) The ecology and evolution of visual pollen signals. *Plant Syst*  
537 *Evol* 222(1):89-111. doi: 10.1007/BF00984097
- 538 Muma MH (1971) Biological and behavioral notes on *Gasteracantha cancriformis*  
539 (Arachnida: Araneidae). *Fla Entomol* 54:345-351. doi: 10.2307/3493600
- 540 O'Hanlon JC (2014) The roles of colour and shape in pollinator deception in the orchid  
541 mantis *Hymenopus coronatus*. *Ethology* 120(7), 652-661. doi: 10.1111/eth.12238
- 542 O'Hanlon JC., Holwell GI, Herberstein, ME (2013) Pollinator deception in the orchid  
543 mantis. *Am Nat* 183(1):126-132. doi: 10.1086/673858
- 544 Oliveira-Filho AT, Ratter JA (2002) Vegetation Physiognomies and Woody Flora of the  
545 Cerrado Biome. *Cerrados Brazil Ecol Nat Hist a Neotrop Savanna* 91–120. doi:  
546 10.1663/0013-0001(2003)057[0656:DFABRE]2.0.CO;2
- 547 Osorio, D., Miklósi, A., & Gonda, Z. (1999) Visual ecology and perception of coloration  
548 patterns by domestic chicks. *Evolutionary Ecology*, 13(7), 673-689.  
549 doi: 10.1023/A:1011059715610
- 550 Peitsch D, Fietz A, Hertel H, et al (1992) The spectral input systems of hymenopteran  
551 insects and their receptor-based colour vision. *J Comp Physiol A* 170:23–40. doi:  
552 10.1007/BF00190398

- 553 Pinheiro J, Bates D, DebRoy S, Sarkar D, R Core Team (2016) R package ‘nlme’: Linear  
554 and Nonlinear Mixed Effects Models (version 3.1-128). [http://CRAN.R-](http://CRAN.R-project.org/package=nlme)  
555 [project.org/package=nlme](http://CRAN.R-project.org/package=nlme)>.
- 556 R Core Team (2015) R: A language and environment for statistical computing. R  
557 Foundation for Statistical Computing, Vienna, Austria. <https://www.R-project.org/>.
- 558 Rao D, Mendoza-Cuenca L (2016) The effect of colour polymorphism on  
559 thermoregulation in an orb web spider. *Sci Nat* 103(7–8): 1–5. doi: 10.1007/s00114-  
560 016-1388-6
- 561 Rayor L (1996) Attack strategies of predatory wasps (Hymenoptera: Pompilidae;  
562 Sphecidae) on colonial orb web-building spiders (Araneidae: *Metepira Incrassata*).  
563 *J Kans Entomol Soc* 69:67–75.
- 564 Renoult JP, Kelber A, Schaefer HM (2015) Colour spaces in ecology and evolutionary  
565 biology. *Biol Rev* 92(1):292-315 doi: 10.1111/brv.12230
- 566 Ruxton GD, Sherratt TN, Speed MP (2004) *Avoiding Attack*. First edition. Oxford:  
567 Oxford University Press, USA. doi: 10.1093/acprof:oso/9780198528609.001.0001
- 568 Schnaitmann C, Garbers C (2013) Article Color Discrimination with Broadband  
569 Photoreceptors. *Curr Biol* 23:2375–2382. doi: 10.1016/j.cub.2013.10.037
- 570 Tinbergen L (1960) The natural control of insects in pine woods I. Factors influencing the  
571 intensity of predation by songbirds. *Arch Néerl Zool* 13, 265h. N.
- 572 Théry M, Casas J (2002) Predator and prey views of spider camouflage. *Nature*, 415:133–  
573 133. doi: 10.1038/415133a
- 574 Théry M, Gomez D (2010). Insect colours and visual appearance in the eyes of their  
575 predators. *Adv Insect Physiol* 38:267 - 353. doi: 10.1016/S0065-2806(10)38001-5
- 576 Théry M, Debut M, Gomez D, Casas J (2005) Specific color sensitivities of prey and  
577 predator explain camouflage in different visual systems. *Behav Ecol* 16:25-29. doi:  
578 10.1093/beheco/arh130
- 579 Troscianko T, Benton CP, Lovell PG, Tolhurst DJ, Pizlo Z (2009) Camouflage and visual  
580 perception. *Philos Trans R Soc B Biol Sci* 364:449-461. doi: 10.1098/rstb.2008.0218
- 581 Tso IM (2013). Insect view of orb spider body colorations. In *Spider Ecophysiology* (pp.  
582 319-332). Springer Berlin Heidelberg. doi: 10.1007/978-3-642-33989-9\_23
- 583 Tso I, Tai P, Ku T, Kuo C, Yang E (2002) Colour-associated foraging success and

- 584 population genetic structure in a sit-and-wait predator *Nephila maculata* (Araneae:  
585 Tetragnathidae). *Anim Behav* 63:175–182. doi: 10.1006/anbe.2001.1878
- 586 Tso I, Lin C, Yang E (2004) Colourful orb-weaving spiders , *Nephila pilipes* , through a  
587 bee ' s eyes. 2631–2637. doi: 10.1242/jeb.01068
- 588 Tso I, Tai P, Ku T, et al (2002) Colour-associated foraging success and population genetic  
589 structure in a sit-and-wait predator *Nephila maculata* (Araneae: Tetragnathidae).  
590 *Anim Behav* 63:175–182. doi: 10.1006/anbe.2001.1878
- 591 Tummers B (2006) DataThief III. <http://datathief.org/>
- 592 White TE, Dalrymple RL, Herberstein ME, Kemp DJ (2016) The perceptual similarity of  
593 orb-spider prey lures and flower colours. *Evol Ecol* 1-20. doi: 10.1007/s10682-016-  
594 9876-x
- 595 White TE, Kemp DJ (2015) Technicolour deceit: a sensory basis for the study of colour-  
596 based lures. *Anim Behav* 105:231–243. doi: 10.1016/j.anbehav.2015.04.025
- 597 White TE, Kemp DJ (2016) Colour polymorphic lures target different visual channels in  
598 prey. doi: 10.1111/evo.12948
- 599 Wickham H (2009) R package 'ggplot2': Elegant graphics for data analysis. Springer-  
600 Verlag New York.

601

## 602 Tables

603

604 Table 1. Delta Akaike Information Criterion (AIC) of Linear Mixed Models of the  
605 chromatic and achromatic contrasts of prey and predators.

| Model                                                   | df | $\Delta$ AIC |
|---------------------------------------------------------|----|--------------|
| <b><i>Multiple prey hypothesis</i></b>                  |    |              |
| <b>Chromatic dimension</b>                              |    |              |
| $\Delta S \sim \text{morph} * \text{observer}$          | 17 | 0.0          |
| $\Delta S \sim \text{morph} + \text{observer}$          | 11 | 23.9         |
| $\Delta S \sim \text{observer}$                         | 8  | 52.4         |
| $\Delta S \sim \text{morph}$                            | 9  | 61.5         |
| $\Delta S \sim 1$                                       | 6  | 90.6         |
| <b>Achromatic dimension</b>                             |    |              |
| <b>excitation</b> $\sim \text{morph} * \text{observer}$ | 17 | 0.0          |
| excitation $\sim \text{morph} + \text{observer}$        | 11 | 57.6         |
| excitation $\sim \text{morph}$                          | 9  | 72.2         |

|                       |   |       |
|-----------------------|---|-------|
| excitation ~ observer | 8 | 84.7  |
| excitation ~ 1        | 6 | 100.2 |

***Multiple predator hypothesis***

**Chromatic dimension**

|                                       |    |      |
|---------------------------------------|----|------|
| $\Delta S \sim \text{morph*observer}$ | 13 | 0.0  |
| $\Delta S \sim \text{morph+observer}$ | 10 | 6.9  |
| $\Delta S \sim \text{observer}$       | 7  | 30.6 |
| $\Delta S \sim \text{morph}$          | 9  | 54.5 |
| $\Delta S \sim 1$                     | 6  | 74.9 |

**Achromatic dimension**

|                             |    |      |
|-----------------------------|----|------|
| excitation ~ morph*observer | 14 | 0.0  |
| excitation ~ morph+observer | 10 | 14.4 |
| excitation ~ observer       | 7  | 21.1 |
| excitation ~ morph          | 9  | 36.9 |
| excitation ~ 1              | 6  | 43.9 |

---

606

607 **Figures**

608

609

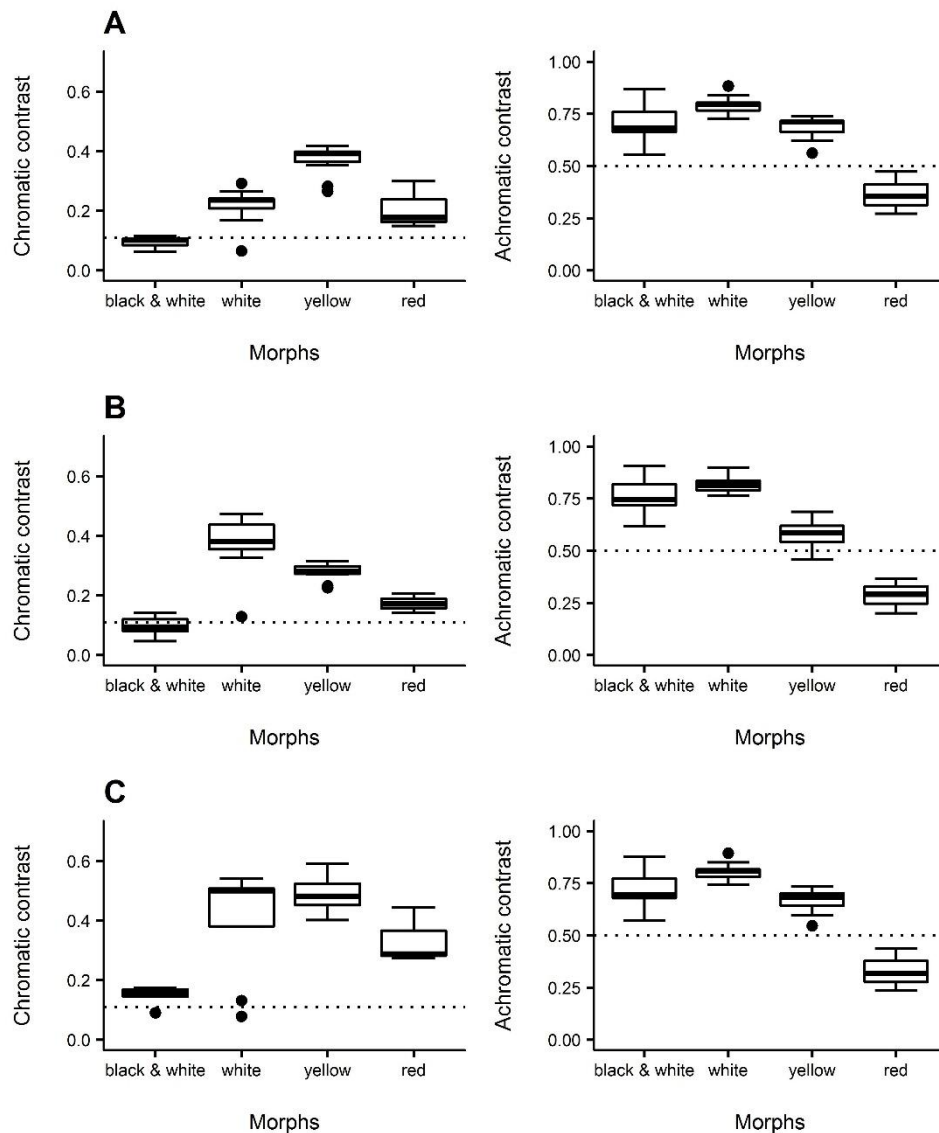

610

611 **Fig. 1.** Chromatic (left) and achromatic (right) contrasts of four *Gasteracantha cancriformis*  
612 morphs (black and white, N=6; white, N=10; yellow, N=13; and red, N=3) when viewed  
613 against a Brazilian savanna background by prey with distinct visual systems. (A) *Apis*  
614 *mellifera* (Hymenoptera). (B) *Drosophila melanogaster* (Diptera). (C) *Fabriciana adippe*  
615 (Lepidoptera). Dotted vertical lines represent the discrimination thresholds for chromatic  
616 contrast (0.11) and photoreceptor excitation for background in achromatic contrast (0.5).

617

618

619

620

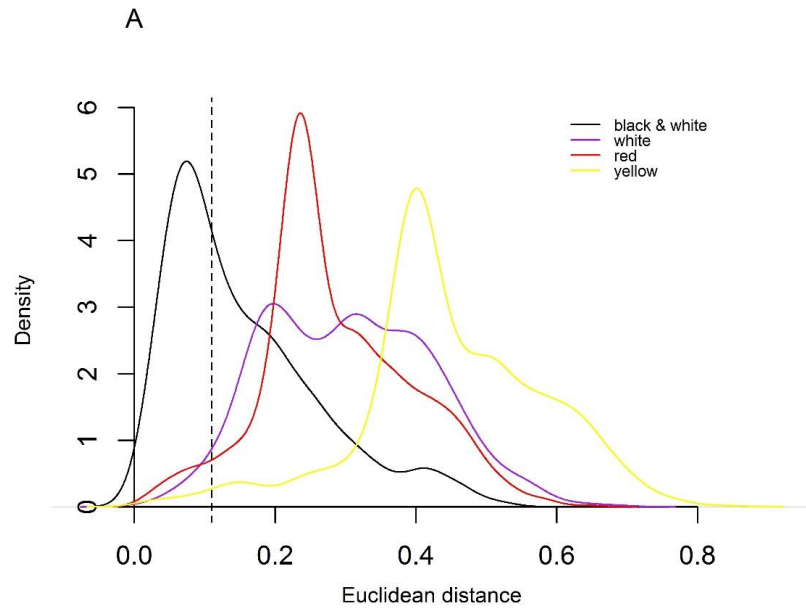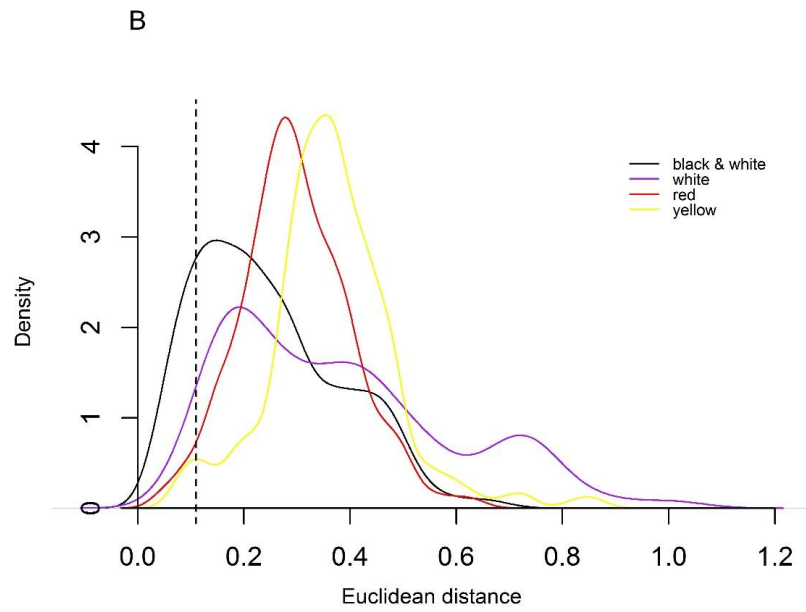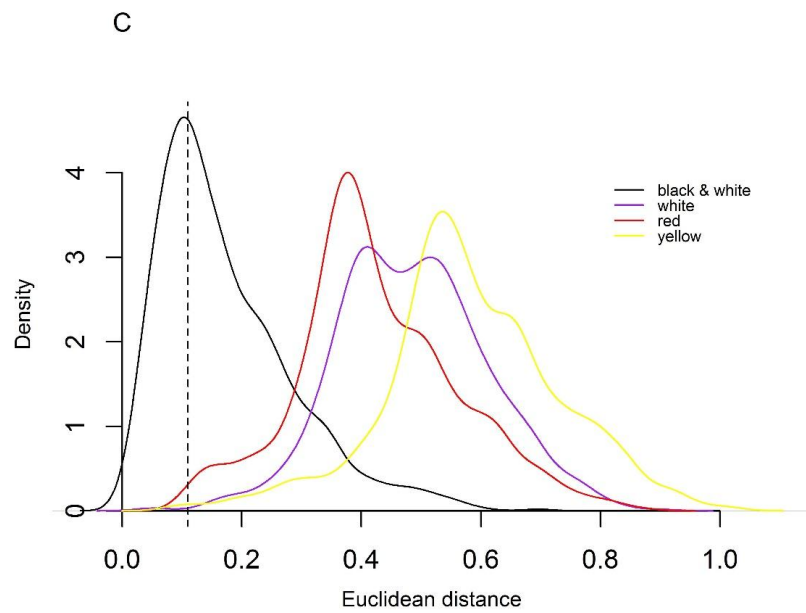



622 **Fig. 2.** Kernel density estimation of the Euclidean distance between four *Gasteracantha*  
623 *cancriformis* morphs (black and white, N=6; white, N=10; yellow, N=13; and red, N=3)  
624 and flower reflectance (N=859). Estimations were based on the photoreceptors of (A) *Apis*  
625 *mellifera* (Hymenoptera), (B) *Drosophila melanogaster* (Diptera), and (C) *Fabriciana*  
626 *adippe* (Lepidoptera). Dotted vertical line represents the crude approximation of the color  
627 discrimination threshold.  
628

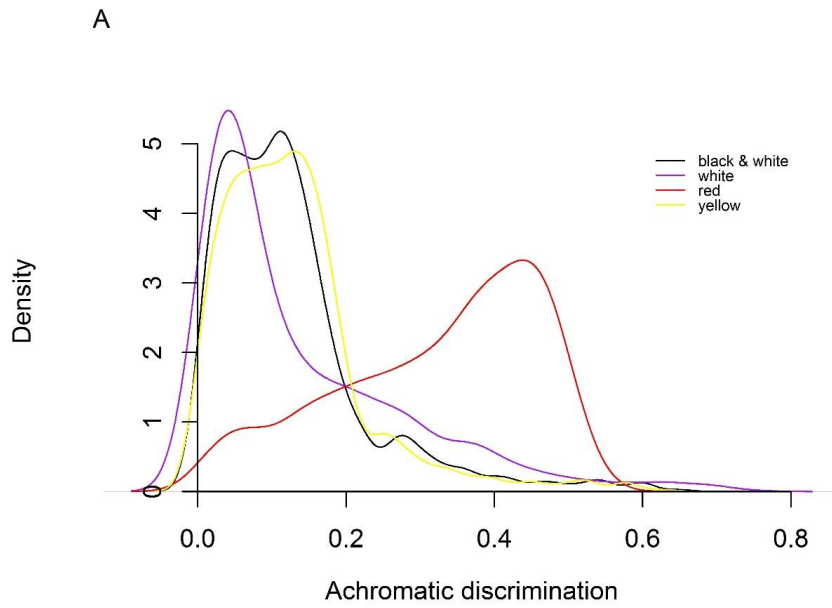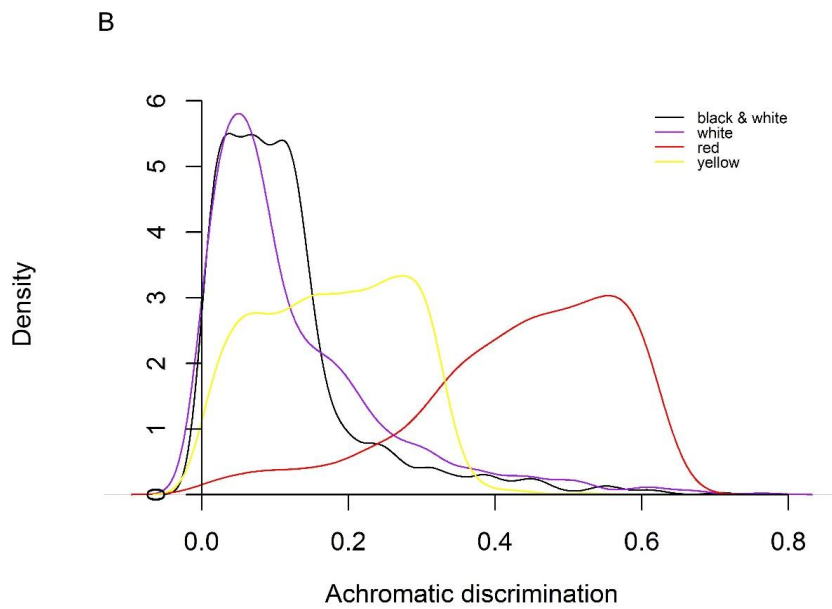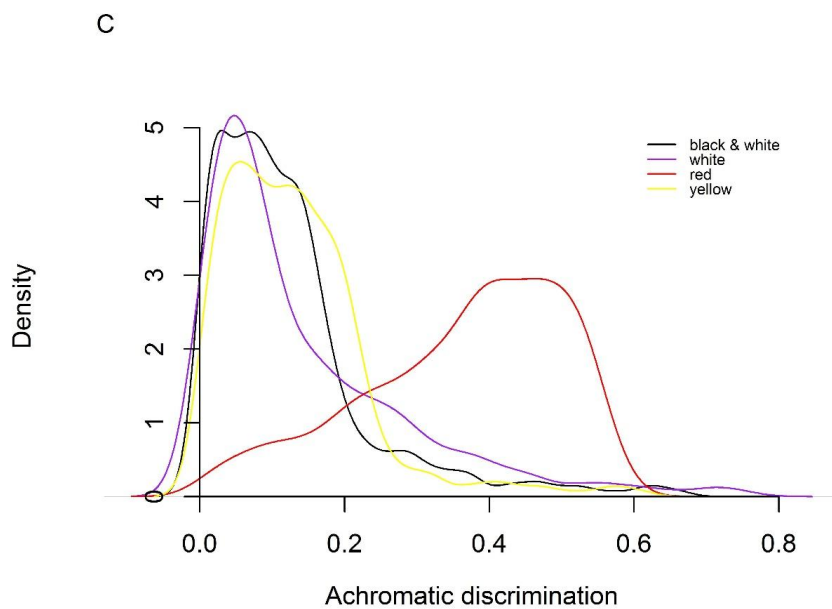

630 **Fig. 3.** Kernel density estimation of achromatic contrast between four *Gasteracantha*  
631 *cancriformis* morphs (black and white, N=6; white, N=10; yellow, N=13; and red, N=3)  
632 and flower reflectance (N=859). Estimations were based on the photoreceptors of (A) *Apis*  
633 *mellifera* (Hymenoptera), (B) *Drosophila melanogaster* (Diptera), and (C) *Fabriciana*  
634 *adippe* (Lepidoptera). Dotted vertical line represents photoreceptor excitation for the  
635 background.

636

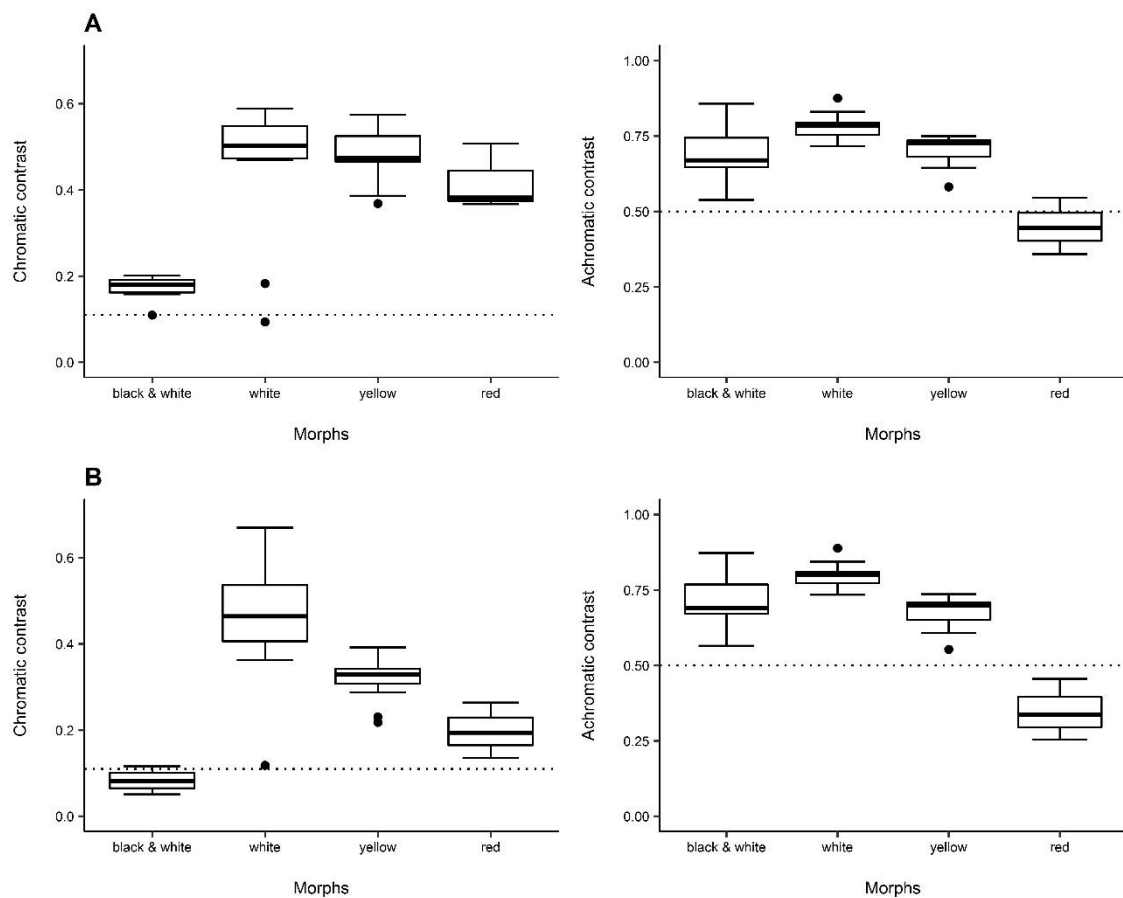

637

638 **Fig. 4.** Chromatic (left) and achromatic (right) contrasts of four *Gasteracantha cancriformis*  
639 morphs (black and white, N=6; white, N=10; yellow, N=13; and red, N=3) when viewed  
640 against a Brazilian savanna background by predators with distinct visual systems. (A)  
641 *Parus caeruleus* (Passeriformes). (B) *Philanthus triangulum* (Hymenoptera). Dotted  
642 vertical lines represent the discrimination thresholds for chromatic contrast (0.06) and  
643 photoreceptor excitation for background in achromatic contrast (0.5).  
644
