# 1 Orb-web spider color polymorphism through the eyes of 2 multiple prey and predators

3 Nathalia Ximenes<sup>1,2</sup>, Felipe M. Gawryszewski<sup>1</sup>

4

5 <sup>1</sup>Evolution and Sensory Ecology Lab, Departamento de Genética, Instituto de Ciências  
6 Biológicas, Universidade Federal de Goiás, Campus Samambaia, Goiânia, GO, 74690-  
7 900, Brazil,

8 <sup>2</sup>Pós-Graduação em Ecologia e Evolução, Universidade Federal de Goiás, Campus  
9 Samambaia, Goiânia, GO, 74690-900, Brazil.

10 \*Author for correspondence (xg.nathalia@gmail.com)

11

## 12 **ABSTRACT**

13 The sensory drive theory predicts that signals, sensory systems, and signaling behavior  
14 should coevolve. Variation in the sensory systems of prey and predators may explain the  
15 diversity of color signals, such as color polymorphism. The spider *Gasteracantha*  
16 *cancriformis* (Araneidae) possesses several conspicuous color morphs. The aim of the  
17 present study was to assess whether the color polymorphism of *G. cancriformis* may be  
18 maintained by pressure from multiple signal receivers, such as prey and predators with  
19 distinct color vision systems. Although, the multiple receivers world is a more realistic  
20 scenario, it has received little attention. In orb-web spiders, the prey attraction hypothesis  
21 states that conspicuous colors are prey lures that increase spider foraging success via  
22 flower mimicry. However, in highly defended species, conspicuous colors could also be  
23 a warning signal to predators. We used color vision modelling to estimate chromatic and  
24 achromatic contrast of *G. cancriformis* morphs as perceived by potential prey and  
25 predator taxa. Our results revealed that individual prey and predator taxa perceive the  
26 conspicuousness of morphs differently. For instance, the red morph is perceived as quite  
27 conspicuous to lepidopteran prey and avian predators, but not by other insects.  
28 Therefore, the multiple prey and predator hypotheses may explain the evolution of color  
29 polymorphism in *G. cancriformis*. However, flower mimicry hypothesis was weakly  
30 corroborated. Other parameters that are not evaluated by color vision models, such as

31 distance, shape, angle, and pattern geometry could also affect the perception of color  
32 morphs by both prey and predators and thereby influence morph survival.

33

34 KEY WORDS: *Gasteracantha cancriformis*; Araneidae; Visual communication;  
35 Aposematism; Luring; Prey attraction

36

## 37 INTRODUCTION

38 The evolution and maintenance of color polymorphism have traditionally been attributed  
39 to apostatic selection (Clarke, 1979). Assuming that predators form a search image  
40 (Tinbergen, 1960), the advantage of rarity promotes the coexistence of multiple prey types  
41 and stabilizes polymorphisms (Bond 2007). Nonetheless, other adaptive and non-adaptive  
42 explanations for the evolution and maintenance of color polymorphisms have been  
43 proposed (Gray and McKinnon, 2007). For instance, gene flow between populations with  
44 distinct phenotypes that are favored by natural selection could maintain polymorphism  
45 within populations (Farkas et al., 2013; Gray and McKinnon, 2007).

46 In the context of visual signaling, the distinct visual systems of prey and predators  
47 may play a role in the evolution and maintenance of color polymorphisms (Ruxton et al.,  
48 2004; White and Kemp, 2015). Animal communication involves the generation, emission  
49 transmission, and processing of the signal by a receiver, in which an appropriate response  
50 is elicited (Endler 1993). Any factors that affect these steps can influence signal efficiency  
51 and, as a result, affect the direction of communication evolution (Endler 1993). Thus, the  
52 diversity of signals are likely influenced by variation in the sensory systems of receivers.

53 Many orb-web spiders exhibit conspicuous coloration. Although sexual selection  
54 is a common explanation for bright coloration in other taxa such as birds (Ryan, 1990),  
55 this scenario is less likely to happen in orb web spiders, because they have limited visual  
56 acuity (Foelix, 2011). *Argiope argentata* (Araneidae), for instance, seems to possess only  
57 one photoreceptor (Tiedemann, 1986). The prey attraction hypothesis states that the  
58 bright coloration of some spiders lures insects, possibly by mimicking flower coloration  
59 (e.g. Craig and Ebert, 1994; Hauber, 2002). The hypothesis has been empirically tested  
60 several times, and most studies have found support for it. The polymorphic *Nephila*  
61 *pilipes* (Nephilidae) present a melanic and a bright colored morph (Tso et al., 2004). The

62 bright color patterns of this species are thought to resemble symmetric flower patterns  
63 that may attract bees, owing to the innate preference of bees for symmetry (Chiao et al.,  
64 2009). Moreover, yellow patches on the spider's body may be perceived as food resources  
65 by flowers visitors (Tso et al. 2004). Besides being attractive to pollinators, the yellow  
66 patches on the species' body also seems to attract hymenopteran predators. Therefore, it  
67 is possible that there is a trade-off between foraging success and predation risk in  
68 polymorphic populations in which some morphs are more cryptic than others (Fan et al.,  
69 2009).

70         The predators of orb-web spiders possess very distinct visual systems. Birds, for  
71 example, are tetrachromats, whose photoreceptors are most sensitive to ultraviolet-violet,  
72 blue, green, and red (Hart 2001), whereas spider hunting wasps, such as members of the  
73 Sphecidae, are trichromats, whose photoreceptors are most sensitive to ultraviolet, blue,  
74 and green (Peitsch, 1992; Briscoe and Chittka, 2001). Similarly, the insect prey of orb-web  
75 spiders also vary in their types of color vision. For example, bees are trichromats with  
76 spectral sensitivities that are similar to those of sphecid wasps (Briscoe and Chittka, 2001),  
77 whereas some lepidopterans are tetrachromats, and some dipterans possess  
78 photoreceptors with five different sensitivity peaks (Schnaitmann et al., 2013). Therefore,  
79 the maintenance of spider color polymorphism may result not only from a trade-off  
80 between prey attraction and capture success but also from selective pressure from multiple  
81 receivers (Endler, 1992; Ruxton et al., 2004; White and Kemp, 2015)

82         The orb-web spider *G. cancriformis* constructs large webs and rests in the web  
83 hub during the day (Levi, 1978). Females of the species possess a hard abdomen with  
84 three pairs of spines and vary in color, with some morphs quite conspicuous to human  
85 observers (Levi, 1978; Gawryszewski and Motta, 2012). The ventral side of females are  
86 mostly black, sometimes with small bright spots. In one studied population, the dorsal  
87 side of females possessed black or reddish spines and four different color patterns: yellow,  
88 white (without UV reflectance), red, and a combination of black and white (white patches  
89 reflects UV; Gawryszewski 2007; Gawryszewski and Motta, 2012). Adult females measure  
90 from 5 to 7 mm in length and 10 to 13 mm in width (Muma, 1971), whereas the males  
91 are brownish, small, and do not exhibit chromatic variation (Levi, 1978). The prey  
92 attraction hypothesis does not seem to explain the coloration of the orb-web spider

93 *Gasteracantha cancriformis* (Araneidae), since both naturally bright morphs and yellow-  
94 painted individuals failed to capture more prey than either naturally cryptic morphs or  
95 black-painted individuals (Gawryszewski and Motta, 2012). Nonetheless, it remains the  
96 possibility that each color morphs attracts preferentially specific types of prey.  
97 Furthermore, although evidence is still needed, Edmunds and Edmunds (1983) suggested  
98 that the conspicuous body coloration of *Gasteracantha* spiders might serve as a warning  
99 signal to predators.

100         Considering that the same “color” may be perceived as cryptic or conspicuous by  
101 different species (Endler and Mappes 2004), each color morph of a polymorphic  
102 populations may represent an adaptation to particular visual systems of prey or predator  
103 species (Endler, 1992; Ruxton et al., 2004; White and Kemp, 2015). Therefore, it is  
104 plausible that the variation of color among individuals within a population is affected by  
105 a diverse range of interactions that leads to different selection process. To date, the role  
106 of multiple predators on the evolution of prey coloration has been approached by  
107 theoretical models (Endler and Greenwood, 1988; Endler and Mappes, 2004). Endler and  
108 Greenwood (1988) models, for instance, indicated that a stable polymorphisms might  
109 evolve in the presence of anti-apostatic (positive frequency-dependent) from different  
110 predators, given that predators perceive prey conspicuousness differently and there is a  
111 covariance between the relative degree of crypsis and the degree of frequency-dependent  
112 selection by each predator.

113         In this study we aimed to explore old and new hypothesis that could potentially  
114 explain the maintenance of color polymorphism in a spider species. The aim of the  
115 present study was to investigate three hypotheses for the evolution and maintenance of  
116 color polymorphism, using *G. cancriformis* as a model. Two derivations from the prey  
117 attraction hypothesis include (1) the *multiple prey hypothesis*, which posits that each color  
118 morph is adapted to lure a specific type of prey, which posits that the spiders attract prey  
119 *via* aggressive mimicry of flower colors and that each color morph mimics a different  
120 flower color. In addition, (3) the *multiple predator hypothesis* posits that the conspicuous  
121 colors found in spiders could serve as warning signals to predators and that color  
122 polymorphism could evolve and be maintained if each color morph is adapted to the  
123 vision of a specific predator.

124

## 125 MATERIALS AND METHODS

### 126 Color vision model

127 Color perception depends on both the signal reflectance and observer visual  
128 system, as well as on the background reflectance spectrum and ambient light intensity  
129 (Endler 1990). Physiological models of color vision include all these factors and have been  
130 effective for objectively studying animal coloration (i.e., independent of human subjective  
131 assessment; Renoult et al., 2015).

132 To estimate the perception of *G. cancriformis* color morphs by distinct predators  
133 and prey groups, we used the color vision model proposed by Chittka (1992). Although  
134 this model has been only validated with behavioral experiments on bees, its general form  
135 allow us to apply it for other taxa (e.g. They and Casas 2002). There are other models  
136 of color vision (Vorobyev and Osorio, 1998; Endler and Mielke, 2005), but when applied  
137 correctly, their results tend to be highly correlated (Gawryzewski, 2017). The Chittka  
138 (1992) model requires four inputs: (1) the irradiance reaching the observed object, (2) the  
139 observer photoreceptor excitation curves, (3) the background reflectance to which  
140 photoreceptors are adapted to, and (4) the reflectance curve of the observed object. First,  
141 the sensitivity factor  $R$  was determined for each photoreceptor, as follows:

$$R = 1 / \int_{700}^{300} I_B(\lambda) S(\lambda) D(\lambda) d\lambda \quad (1)$$

142 where  $I_B(\lambda)$  is the spectral reflectance function of the background,  $S(\lambda)$  is the spectral  
143 sensitivity function of each photoreceptor, and  $D(\lambda)$  is the illuminant irradiance spectrum.  
144 Secondly, the quantum flux  $P$  (relative amount of photon catch) is calculated, as follows:

$$P = R \int_{700}^{300} I_S(\lambda) S(\lambda) D(\lambda) d\lambda \quad (2)$$

145 where  $I_S(\lambda)$  is the spectral reflectance function of the stimulus. Assuming that the  
146 maximum excitation of a photoreceptor is 1, the phototransduction process is determined  
147 by:

$$E = P / (P + 1) \quad (3)$$

148 Stimuli spectra are projected in specific color spaces. The coordinates of each  
149 spectrum are calculated using photoreceptor excitations, as follows (Chittka et al. 1994):

$$X1 = \sin 60^\circ (E_3 - E_1) \quad (4)$$

$$X2 = E_2 - 0.5 (E_1 + E_3) \quad (5)$$

150 For tetrachromat organisms (Théry and Casas, 2002):

$$X1 = \frac{2\sqrt{2}}{3} \cos 30^\circ (E_3 - E_4) \quad (6)$$

$$X2 = E_1 - \frac{1}{3} (E_2 + E_3 + E_4) \quad (7)$$

$$X3 = \frac{2\sqrt{2}}{3} [\sin 30^\circ (E_3 + E_4) - E_2] \quad (8)$$

151 We extended the model of Chittka (1992) to accommodate pentachromatic organisms, as  
 152 follows:

$$X1 = \frac{5}{2\sqrt{2}\sqrt{5}} (E_2 - E_1) \quad (9)$$

$$X2 = \frac{5\sqrt{2}}{2\sqrt{3}\sqrt{5}} [E_3 - \left(\frac{E_1 + E_2}{2}\right)] \quad (10)$$

$$X3 = \frac{5\sqrt{3}}{4\sqrt{5}} [E_4 - \left(\frac{E_1 + E_2 + E_3}{3}\right)] \quad (11)$$

$$X4 = E_4 - \left(\frac{E_1 + E_2 + E_3 + E_4}{4}\right) \quad (12)$$

153 Chromatic contrast between a color stimulus and background, or between two  
 154 color stimuli, is calculated as the Euclidean distance ( $\Delta S$ ) between two points in color  
 155 space, as follows:

$$\Delta S = \sqrt{\sum_{i=1}^n (X_{a_i} - X_{b_i})^2} \quad (13)$$

156 where  $X_i$  ( $i = 1, 2, 3, \dots, n$ ) represents the coordinate in the color space.

157 The color spaces are chromaticity diagrams and, thus, do not estimate the  
 158 achromatic contrast between objects. Nonetheless, achromatic contrasts can be important  
 159 visual cues used by both prey and predators. In bees, achromatic contrast is more  
 160 important than chromatic cues for objects that subtend a visual angle smaller than  $\sim 15^\circ$ ,  
 161 which means that bees have to be very close to flowers in order to use their color vision  
 162 for discrimination tasks (Giurfa et al., 1997). Similarly, birds use achromatic contrast in  
 163 detection of small objects (Osorio et al., 1999). We estimated the achromatic contrast as  
 164 the excitation (Eq. 3) of the photoreceptor responsible for achromatic discrimination in  
 165 each organism (Chittka and Kevan 2005).

166 For our modeling, we used the reflectance data of *G. cancriformis* color morphs  
 167 that was collected during a previous study (for reflectance curves see figure 1.8 in

168 Gawryszewski, 2007, and figure 5 in Gawryszewski and Motta 2012). These data have  
169 already been used to estimate the visual contrast of the yellow, white and the black and  
170 white morphs from the perspective of *Apis mellifera* (Gawryszewski and Motta 2012). The  
171 spiders were collected from a Brazilian savanna physiognomy, namely Cerrado *sensu*  
172 *stricto*, which is characterized by shrubs and trees of 3 to 8 m tall that are contorted and  
173 possess thick, fire-resistant bark, a crown cover of >30%, and additional herbaceous  
174 vegetation (Oliveira-Filho and Ratter 2002). The background reflectance was estimated  
175 from the average reflectance of leaves, leaf litter, bark, and grasses that were collected from  
176 the same area as the spiders (see figure 5 in Gawryszewski and Motta, 2012). To avoid  
177 issues with negative values and unrealistic positive values we adjusted the reflectance data  
178 by subtracting the reflectance values by the minimum value of each measurement. As  
179 illuminant spectrum, we used the International Commission on Illumination (CIE)  
180 standard illuminant of D65, which is comparable to open areas, such as the Brazilian  
181 savanna (Chittka, 1996).

182 Visual modeling calculations were conducted using the ‘colourvision’ R package  
183 (Gawryszewski, 2017). Linear mixed models were performed using the ‘nlme’ (Pinheiro  
184 et al., 2016,) and ‘lme4’ packages (Bates et al. 2015), graphs were plotted using the  
185 ‘ggplot2’, ‘ggExtra’, ‘gridExtra’, and ‘pavo’ packages (Wickham, 2009; Maia et al., 2013;  
186 Attali, 2016; Auguie, 2016; R Core Team, 2015), and  $R^2$  values were computed using the  
187 package ‘piecewiseSEM’ (Nakagawa and Schielzeth, 2013).

188

### 189 **Multiple prey hypothesis**

190 Using the model described above, we estimated the chromatic and achromatic  
191 conspicuousness of the *G. cancriformis* morphs (yellow, white, red, and white patches of  
192 the black and white morph) to a suit of potential prey: *A. mellifera* (Hymenoptera,  
193 Apidae), *Drosophila melanogaster* (Diptera, Drosophilidae), and *Fabriciana adippe*  
194 (Lepidoptera, Nymphalidae). Those species are not necessarily sympatric with *G.*  
195 *cancriformis*. However, these insect orders are commonly intercepted by orb-webs in field  
196 experiments (Craig and Ebert 1994; Tso et al. 2002) and represent the diversity of visual  
197 systems among insects (Briscoe and Chittka, 2001). Variation within of wavelength of  
198 maximum sensitivity is small in Hymenoptera is very little, except for ants and in

199 Lepidoptera most species present four photoreceptor spectral curves (Briscoe and Chittka,  
200 2001). For Diptera, the number of photoreceptors is not so conservative among species  
201 and there are not many studies on the color vision of this taxon (Briscoe and Chittka,  
202 2001; Lunau, 2014). Visual modeling work have usually considered Diptera as a  
203 tetrachromatic organism (White and Kemp, 2016; White et al., 2016; O’Hanlon et al.  
204 2014). However, recent work showed that *Drosophila melanogaster* use a fifth  
205 photoreceptor for color vision (Schnaitmann et al., 2013). Although it remains to be tested  
206 whether this species behave as pentachromat we decided to explore this possibility and  
207 modelled this is species using five spectral curves for color vision.

208 For *A. mellifera* and *D. melanogaster*, we used photoreceptor sensitivity curves  
209 from the literature (Peitsch et al., 1992; Schnaitmann et al., 2013). It was recently shown  
210 that, together with R7-R8 photoreceptors, R1-R6 photoreceptors contribute to color vision  
211 in *D. melanogaster* (Kelber and Henze, 2013; Schnaitmann et al., 2013). Therefore, we  
212 included the R1-R6 photoreceptor curve, treating *D. melanogaster* as a pentachromat.  
213 The graphical curves were extracted directly from the figures of relevant publications  
214 using DataThief III version 1.7 (Tummers, 2006). For *Fabriciana adippe*, however, no  
215 photoreceptor sensitivity curves are available, so electrophysiological measurements of  
216 photoreceptor sensitivity peaks ( $\lambda_{\max}$ ; Eguchi et al., 1982) were used to estimate the  
217 photoreceptor curves (for details see Govardovskii et al., 2000).

218 For achromatic contrast, bees only use the green photoreceptor (Giurfa et al.,  
219 1996), whereas flies only use the outer photoreceptors (R1-R6; Kelber & Henze, 2013).  
220 Because the exact mechanism used by lepidopterans for achromatic discrimination is  
221 incompletely understood, we assumed that they employ the same mechanism as in bees.  
222 The color hexagon model assumes that photoreceptors respond to half their maximum  
223 for the background they are adapted to, so that the photoreceptor excitation for  
224 background is equivalent to 0.5 units (Chittka, 1992).

225 The multiple prey hypothesis predicts that different prey taxa perceive color  
226 morphs differently. To assess whether each spider morph was perceived differently by  
227 prey species, we constructed two linear mixed models, one for chromatic contrast and  
228 one for achromatic contrast. Either chromatic ( $\Delta S$ ) or achromatic contrast were used as  
229 the dependent variable, and spider morph and prey taxon were used as the independent



230 variables (contrast = spider morph  $\times$  observer). The spider morph was defined as yellow,  
231 white, red, or black and white, and the observers were defined as hymenopteran,  
232 dipteran, or lepidopteran. Individual spiders were used as random effects. Normality and  
233 homogeneity were verified by visual inspection of quantile-quantile and residuals vs. fitted  
234 values plots. We computed all nested models and used the Akaike Information Criterion  
235 (AIC) to select the best model. Marginal and conditional  $R^2$  were estimated according to  
236 the recommendations of Nakagawa and Schielzeth (2013).

237 As a reference point, we used a color discrimination threshold of  $\Delta S = 0.11$ , which  
238 is the threshold value below which trained bees are unable to distinguish different flower  
239 colors (Chittka, 1996). However, discrimination thresholds are variable and can change  
240 depending on the study species, learning conditions, previous experience, background  
241 coloration, whether the task involves discrimination between colors or detection against  
242 the background, and whether objects are compared sequentially or simultaneously  
243 (Avarguès-Weber & Giurfa, 2014). It should also be noted that threshold values were not  
244 behaviorally validated for other taxa.

245

### 246 **Flower mimicry hypothesis**

247 To test the multiple mimic models hypothesis, we compared how flowers and spider  
248 morphs are perceived by prey. We gathered all flower reflectance data available in the  
249 Floral Reflectance Database (FReD; Arnold et al., 2010), excluding reflectance data from  
250 lower flower parts, leaves, bracts, stamens, the inner parts of bell-shaped flowers, and  
251 unknown items, as well as spectrum files that did not cover 300 to 700 nm. Most species  
252 in the database have only one reflectance spectrum, and for species with multiple  
253 reflectance spectra, we randomly selected a single spectrum. We did not average the  
254 reflectance of these species because there was no information available on whether these  
255 measurements referred to different individuals or different parts of single flowers. In total,  
256 we gathered reflectance data from 859 plant species. We grouped flowers visually  
257 according to the 10 categories proposed by Chittka et al. (1994), considering whether they  
258 reflect or absorb in four spectral ranges, UV (300-400 nm), blue (400-500 nm), green (500-  
259 600 nm) and red (600-700 nm). We deleted three spectral curves that did not seem to fit  
260 in any of these categories. A caveat of this analysis is that these flowers are not necessarily

261 sympatric to *Gasteracantha cancriformis*. However, flowers spectral curves variation are  
262 subtle, because there is a constraint on flower pigments blending (Chittka and Menzel,  
263 1992; Chittka et al. 1994). In addition, we computed reflectance curves from different  
264 countries available in FReD database. A qualitative analysis strongly suggests that they all  
265 have similar shapes (Fig. S1).

266 The multiple mimic model hypothesis predicts that different colour morphs are  
267 mimicking different flower colors. First, to evaluate color regardless of the observer, we  
268 compared hue (Eq. 13), saturation (Eq. 14) and brightness (Eq. 15) of flowers and spiders  
269 (Anderson and Prager, 2006):

$$H_3 = \lambda_{Rmid} \quad (13)$$

270 where  $\lambda_{Rmid}$  is the wavelength at the middle point between the minimum and maximum  
271 reflectances;

$$S_8 = (R_{max} - R_{min})/B_2 \quad (14)$$

272 where  $R_{max}$  and  $R_{min}$  are the maximum and minimum reflectance points; and  $B_2 =$   
273  $\sum_{\lambda=300}^{\lambda=700} R_i/n_w$ , where  $R_i$  is the reflectance corresponding to each wavelength point, and  $n_w$   
274 is the total wavelength intervals;

$$B_3 = R_{max} \quad (15)$$

275 where  $R_{max}$  is the maximum reflectance.

276 We estimated the chromatic difference between individual flowers and the mean  
277 achromatic value for each color morph, and calculated the percentage of values below or  
278 equal to the theoretical detection threshold of 0.11. Secondly, we computed chromatic  
279 distances for spider morphs and flowers following the same steps as for the previous  
280 section, considering the visual system of *A. mellifera*, *D. melanogaster* and *F. adippe*.  
281 Then, we calculated a matrix of chromaticity distances between each individual spider  
282 color morph and each individual flowers species.

283 To evaluate if each spider morph and flower category had similar perceptions to  
284 each prey species, we constructed two linear mixed models, one for chromatic contrast  
285 and one for achromatic contrast. Chromatic or achromatic contrast were used as the  
286 dependent variable, and spider morph, flower category and prey taxon were used as the  
287 independent variables (contrast = spider morph  $\times$  flower category  $\times$  observer). The spider  
288 morph was defined as yellow, white, red, or black and white, flower category as '1' to

289 '10', and the observers were defined as hymenopteran, dipteran, or lepidopteran.  
290 Individual spiders and individual flowers were considered as random effects. Normality  
291 and homogeneity were verified as for the first hypothesis. We selected the best model  
292 using AIC, and computed marginal and conditional  $R^2$  for each model (Nakagawa and  
293 Schielzeth, 2013).

294 As reference points, we used discrimination thresholds of  $\Delta S = 0.11$ , for the  
295 chromatic contrast, and for the achromatic contrast, we assumed the excitation value of 0  
296 for all the three insect taxa.

297

### 298 **Multiple predator hypothesis**

299 The methodology used to investigate the multiple predator hypothesis methodology was  
300 very similar to that used for the multiple prey hypothesis, except that we used predator  
301 species in our models. As predators, we considered the bird *Parus caeruleus* (Paridae)  
302 and the wasp *Philanthus triangulum* (Sphecidae), since birds and wasps are the main  
303 predators of orb-web spiders (Rayor, 1996; Foelix, 2010), are visually guided hunters, and  
304 have distinct color vision systems. For *P. caeruleus*, we used photoreceptor sensitivity  
305 curves available in the literature (Hart, 2001), and for *P. triangulum*, we used  
306 photoreceptor sensitivity peaks to estimate photoreceptor sensitivity curves (data available  
307 in Briscoe and Chittka, 2001; see Govardovskii et al. 2000 for estimation of sensitivity  
308 curves from sensitivity peaks). Again, those species are not sympatric with *G. cancriformis*,  
309 but we do not expect a great variation of photoreceptors types within hymenopterans  
310 (Peitsch et al., 1992) nor Passeriformes (Hart, 2001).

311 The multiple predator hypothesis predicts that different predator taxa perceive  
312 color morphs differently. To assess this prediction, we established two linear mixed  
313 models, one for chromatic contrast and one for achromatic contrast. Either chromatic  
314 ( $\Delta S$ ) or achromatic contrast were used as the dependent variable, and spider morph and  
315 predator taxon were used as the independent variables (contrast = spider morph  $\times$   
316 observer). The spider morph was defined as yellow, white, red, or black and white, and  
317 individual spiders were used as random effects. Normality and homogeneity were verified  
318 by visual inspection of quantile-quantile and residuals vs. fitted values plots. We computed  
319 all nested models and used the Akaike Information Criterion to select the best model.

320 We estimated marginal and conditional  $R^2$  for the models as recommendations of  
321 Nakagawa and Schielzeth (2013).

322 As in the multiple prey hypothesis, we used discrimination thresholds as reference  
323 points. For the chromatic contrast, we considered color discrimination thresholds of  $\Delta S =$   
324 0.11 and  $\Delta S = 0.06$  for the wasp (Dyer and Chittka, 2004) and bird (Théry et al., 2005),  
325 respectively. For the achromatic contrast, we considered double cones in birds (Hart,  
326 2001), and assumed green photoreceptors for wasps, as in bees, and compared values  
327 obtained to the excitation of 0.5.

328

## 329 **RESULTS**

### 330 **Multiple prey hypothesis**

331 For chromatic contrast, the model that included the interaction between spider morph  
332 and prey taxon presented the lowest AIC value (Table 1). The yellow morph presented  
333 the highest  $\Delta S$  value for *A. mellifera* and *F. adippe* vision, whereas the white spider  
334 presented the highest  $\Delta S$  value for *D. melanogaster*, followed by the yellow morph (Fig.  
335 1). The white patch of the black and white spiders presented a  $\Delta S$  value that was very  
336 close to the theoretical discrimination threshold for all prey species (Fig. 1). The red  
337 spiders presented  $\Delta S$  values near the theoretical discrimination threshold for *A. mellifera*  
338 and *D. melanogaster*, but not for *F. adippe* (Fig. 1). For prey achromatic contrast, the  
339 model that included the interaction between variables presented the lowest AIC value  
340 (Table 1). For all prey groups, the white morph had the highest excitation value, followed  
341 by the black and white, yellow, and red morphs, respectively (Fig. 1). The model  
342 coefficients are provided in the supplementary material (Table S1 and S2).

343

### 344 **Flower mimicry hypothesis**

345 We found three peaks of hue for the flowers, around 400, 500 and 600 nm, which are  
346 similar to the average hue of spider morphs (Fig. 2A). The saturation metric had only one  
347 peak for flowers, to which black and white, white and yellow spider morphs were close  
348 (Fig. 2B). The brightness of flowers also only presented a single peak, and white, red and  
349 yellow spider morphs had average brightness near to this peak (Fig. 2C).

350 For all three prey species, only the white patch of the black and white morph had  
351 high percentage of values near the chromatic theoretical discrimination threshold of 0.11  
352 when compared to all flowers reflectance spectra: 44.5% for *A. mellifera*, 16.8% for *D.*  
353 *melanogaster*, and 35% for *F. addipe*. For the other spider morphs only a small proportion  
354 of the Euclidean distances between flowers and morphs presented values  $< 0.11$ . For *A.*  
355 *mellifera* only 1.6% of yellow morphs presented values lower than 0.11, 3.4% of white  
356 morphs, and 4.8% of red morphs. For *D. melanogaster* only 2.4% of yellow morphs had  
357 values lower than 0.11, 4.0 % of white spiders, and 3.0% of red morphs. For *F. addipe* this  
358 values were 0.4%, 0.2%, and 0.5% respectively.

359 In the color vision model chromatic dimension, the statistical model with  
360 interaction among the three variables (flower categories, spider morphs, and prey taxon)  
361 had the lowest AIC (Table 2 and S3). In a general view, there seems to be a tendency of  
362 growing contrast starting with the black and white morph followed by white, yellow and  
363 red morphs (Fig. 3). Only the comparison of black and white spiders and the category '8'  
364 of flowers (white flowers that reflect UV) was below the discrimination threshold of 0.11  
365 for all prey taxa (Fig. 3). The categories '3' and '4' compared to black and white spiders  
366 were slightly above 0.11 for *A. mellifera*, and '4' for *F. adippe* (Fig. 3). Some categories  
367 were around 0.15, which may indicate that for these, flowers and spiders coloration may  
368 be perceived as similar to flowers: categories '7' and '9' compared to the black and white  
369 morph, and '3' compared to yellow spiders for *A. mellifera*; '4' and '9' compared to the  
370 black and white morph for *D. melanogaster*; and '3' compared to black and white, for *F.*  
371 *adippe* (Fig. 3). For the achromatic dimension, the statistical model with interaction among  
372 all variables also had the lowest AIC (Table 2 and S4). Most of the groups had excitation  
373 values around 0 and 0.2, regardless the spider morph and observer (Fig. 3).

374

### 375 **Multiple predator hypothesis**

376 For the chromatic contrast, the model with interaction between variables presented the  
377 lowest AIC value (Table 1). The black and white morph presented the lowest  $\Delta S$  value  
378 for both predators (Fig. 4A,B; Table S5). The white morph was the one with highest  $\Delta S$   
379 value for *P. caeruleus*, though yellow and red morphs presented similar values (Fig. 4A).  
380 For *P. triangulum*, the white spider morph presented the highest  $\Delta S$  value, followed by

381 the yellow and red morphs. The latter was near the theoretical discrimination threshold  
382 of 0.11 (Fig. 4B). For the achromatic contrast, the model that included the interaction  
383 between variables presented the lowest AIC value (Table 1), even though the values of  
384 the two predator species were very similar. For *P. caeruleus*, the white morph had the  
385 highest excitation value, followed by the yellow, black and white, and red morphs,  
386 respectively (Fig. 4C). The white morph also had the highest excitation value for *P.*  
387 *triangulum*, followed by the black and white, yellow, and red morphs, respectively (Fig.  
388 4D). The model coefficients are provided in the supplementary material (Table S5 and  
389 S6).

390

## 391 **DISCUSSION**

392 Our statistical analyses show that the majority of *G. cancriformis* morphs have a high  
393 probability of being detected by potential prey and the degree of detectability varies  
394 according to the receiver. Some spider morphs are also conspicuous for predators, but  
395 the multiple predator hypothesis was partially corroborated, because the degree of  
396 detectability between predators was similar. In addition, we offer some support for the  
397 flower mimicry hypothesis.

398

### 399 **Multiple prey hypothesis**

400 In *G. cancriformis*, spider morphs conspicuousness is perceived differently by  
401 prey species. The yellow and white morphs were the most conspicuous to all prey taxa.  
402 The former being more contrasting from the background for honeybee color vision, and  
403 the latter, for flies. The red morph, although inconspicuous for honeybee and flies,  
404 showed high detectability for butterflies. A recent study using the receptor noise-limited  
405 color vision model showed that insects prey perceive coloration of *Verrucosa arenata*  
406 morphs differently, however the maintenance of color polymorphism does not seem to  
407 be influenced by multiple prey as we suggested here. Yellow morphs of *V. arenata* have  
408 higher chromatic contrast than white morphs for Diptera and Hymenoptera. Whereas in  
409 the achromatic dimension the white morph had a higher contrast for both prey taxa  
410 (Ajuria-Ibarra et al. 2017). Color morphs may, instead be influenced by other factors such

411 as different visual channels of relevant observers or illumination (Ajuria-Ibarra et al. 2017;  
412 White and Kemp, 2016).

413 The hypothesis that different morphs exploit different visual channels in prey was  
414 also proposed in another study to explain the evolution of color polymorphism in  
415 *Gasteracantha fornicata*. The yellow morphs of *G. fornicata* would benefit from  
416 stimulating the dipteran chromatic channel, whereas white morphs would benefit from  
417 stimulating the achromatic channel (White and Kemp, 2016). For the achromatic  
418 dimension, although the statistical analyses also suggested an interaction between spider  
419 morph and prey taxon, spider morphs presented similar levels of achromatic detectability  
420 comparing among prey taxa, therefore, this idea seems inconsistent with the multiple prey  
421 hypothesis for *G. cancriformis*. However, when comparing chromatic and achromatic  
422 contrasts of each prey taxa individually, we observe different detectabilities between the  
423 two visual channels for the morphs. Therefore, the hypothesis of exploitation of different  
424 visual channels of prey could be possible to explain the color polymorphism, as in White  
425 & Kemp (2016), but possibly not enough to explain such a diverse color variation as occur  
426 in *G. cancriformis*.

427

#### 428 **Flower mimicry hypothesis**

429 Several authors have proposed flower mimicry hypothesis as a mechanism of prey  
430 attraction by orb-web spiders *via* conspicuous body coloration (e.g. Craig and Ebert, 1994;  
431 Hauber, 2002). However, the hypothesis has seldom been tested. Flower mimicry using  
432 color vision modelling has been tested for orchid mantis (*Hymenopus coronatus*) prey  
433 (O'Hanlon et al., 2013). Color vision modelling suggested that pollinators are unable to  
434 distinguish the colors of the mantis and flowers, and a field experiment showed that the  
435 mantis actually attracts more pollinators than flowers (O'Hanlon et al., 2013). Our results  
436 showed that, considering only color metrics, most of the *G. cancriformis* morphs indeed  
437 have similar coloration to flowers. However, when we modeled color perception to  
438 potential prey, only the black and white morphs is similar to a category of white flowers.  
439 Similarly to our results, in *G. fornicata* the white morphs seems to be indistinguishable  
440 from sympatric flowers according to results of bee color vision modeling, but yellow  
441 morphs and flowers were not perceptually different (Maia & White, 2017). Conversely, a

442 study of various orb-web spider species that also used color vision models found that, as  
443 perceived by dipterans and hymenopterans, the colors of spiders are very similar to those  
444 of flowers (White et al., 2016). Both pieces of evidence are circumstantial. They may only  
445 reflect the diversity of flower colors and spider colors. Additionally, in the Brazilian  
446 savanna, *G. cancriformis* is abundant during the transition from the wet to the dry season,  
447 which overlaps partially the flowering period of woody plants (Oliveira, 1998; Gouveia  
448 and Fefili, 1998). Flowering peaks in these plants is related to pollinators occurrence, that  
449 is around April to October (Oliveira, 1998; Gouveia and Fefili, 1998). Therefore, flower  
450 coloration mimicry would be an advantageous foraging strategy to spiders that are  
451 abundant during this period of the year. However, a field experiment conducted with *G.*  
452 *cancriformis* showed that color had no effect on prey capture success (Gawryzewsky and  
453 Motta, 2012). Furthermore, it could be possible that insects do not represent a strong  
454 selection force, considering that most of taxa only perceive chromatic contrast when they  
455 are very close to the object (Giurfa et al., 1997).

456

#### 457 **Multiple predators hypothesis**

458 The results of the present study do not strongly support the multiple predator  
459 hypothesis for the maintenance of color polymorphism in *G. cancriformis*, as the spider  
460 morphs present the same order of conspicuousness in both the chromatic and achromatic  
461 dimensions. Even so, red morphs are particularly more conspicuous to a bird than to a  
462 wasp. Therefore, this signal could be targeting bird predators but would appear relatively  
463 inconspicuous to a hymenopteran predator and prey. In contrast, the white and yellow  
464 morphs are highly detectable by both predator taxa. The colors of two of the four *G.*  
465 *cancriformis* morphs (yellow and red) are typical of aposematic species (Endler and  
466 Mappes, 2004). Conspicuous coloration is especially advantageous when it increases the  
467 mismatch with the background and facilitates predator learning (Endler and Greenwood,  
468 1988). Spiders of the genus *Gasteracantha* possess spines and a hard abdomen. Moreover,  
469 the hunting wasp *Sceliphron laetum* avoids provisioning initial instars with *Gasteracantha*  
470 spiders (Elgar and Jebb, 1999). Morphological and behavioral defenses that make  
471 ingestion difficult along with the species' bright colors constitute aposematism (Endler and  
472 Greenwood, 1988; Ruxton et al., 2004). Though aposematism is not commonly reported



473 in spiders (Oxford and Gillespie, 1998), Brandley et al. (2016) conducted an experiment  
474 with black widow models and found that models with red markings were more likely to  
475 be avoided by birds than all black models.

476 Color polymorphism may seem counterintuitive in aposematic species, but it may  
477 occur when frequency-dependent selection is different among predators, for instance,  
478 when a predator presents strong apostatic selection, while other predator has a strong anti-  
479 apostatic selection (Endler and Greenwood, 1988). It is also possible when there is a  
480 covariance between the relative crypsis of morphs for one predator and frequency-  
481 dependent selection. However, contrarily to the first scenario, the equilibrium is unstable  
482 (Endler and Greenwood, 1988). Besides, scenarios of overdominance, or equal fitness  
483 from different selection pressures may also influence (Stevens and Ruxton, 2012). In *G.*  
484 *cancriformis*, morphs have variable degrees of conspicuousness for a single predator or  
485 for multiple predators, therefore they might be subject to distinct types of selection.

486 Not only selective pressures from prey and predators may influence color  
487 polymorphism, but also thermoregulatory effects and the effect of illumination on the  
488 signaler detectability (Rao and Mendoza-Cuenca, 2016; Rojas et al., 2014). Therefore,  
489 polymorphism may result from multiple evolutionary forces, in which some morphs  
490 signals their impalatability to predators, whereas other morphs are protected from certain  
491 predators due to camouflage, meanwhile, they may benefit from thermoregulatory  
492 behavior by occupying different microhabitats.

493 Most of studies focus on a single signal receiver, however, we could better  
494 understand signal evolution if we considered that individuals interact with different kinds  
495 of observers, whether they are mutualists or antagonists (Endler and Mappes, 2014;  
496 Schaefer et al., 2004). The multiple receiver hypothesis has been evaluated in intersexual  
497 and intrasexual relations (Guindre-Parker et al., 2012), signaler interaction with prey and  
498 predators (Endler, 1983), and interaction with pollinators and herbivores (Irwin et al.,  
499 2003). For instance, in the snow bunting (*Plectrophenax nivalis*), multiple achromatic  
500 patches signal distinct information to females and males: wing coloration inform about  
501 male immune response and reproductive performance, whereas plumage of the rectrices  
502 and mantle convey information about territoriality and probable aggression (Guindre-  
503 Parker et al., 2012). Multiple receivers also maintain guppy color polymorphism, males

504 can have black, orange, yellow or iridescent spots, that influence on female attraction, but  
505 they vary in frequency and size accordingly with predation risk (Endler, 1983). Lastly,  
506 flowers polymorphism is also influenced by multiple receivers as in the wild radish  
507 (*Raphanus sativus*). Plants that produce anthocyanin – a defense component - and plants  
508 that do not produce vary in coloration. Therefore, herbivores may use coloration as cue  
509 to find the anthocyanin-recessive morphs (Irwin et al., 2003).

510 Here, we present a small step of the multiple receivers hypothesis on the evolution  
511 of color polymorphism, multiple functions may also maintain this variation, although it  
512 remains to be tested. Variation of signal receivers alone may not be sufficient to explain  
513 color polymorphism, and gene flow may act together on the maintenance of color  
514 variation (Gray and McKinnon, 2007). We only considered chromatic and achromatic  
515 discrimination, but color pattern geometry, shape, contour, size, angle, texture, and  
516 distance of visual detection (Troschianko et al., 2009) may also influence the behavior of  
517 both prey and predators toward spiders since different species use distinct visual cues for  
518 stimuli detection and recognition (Théry and Gomez, 2010). Furthermore, color vision  
519 models do not include other perceptual mechanisms, such as cognition, color  
520 categorization, past experiences, or memory imprecision (Renoult et al., 2015), even  
521 though these factors may affect detectability and, consequently, influence the survival rate  
522 of morphs in different ways (Théry and Gomez, 2010). Additionally, non-adaptive  
523 explanations, such as overdominance and allele equilibrium in absence of selection, are  
524 often ignored when studying polymorphisms in an ecological perspective. Finally,  
525 predation experiments, field experiments that evaluate prey taxa caught by the different  
526 spider morphs, and ecological data on abundance and composition of prey and predators  
527 populations that occur sympatrically with *G. cancriformis* are paramount to validate and  
528 complement the findings of the present study.

529

### **Acknowledgments**

We thank CAPES for financial support (CAPES/PROEX), and for a scholarship awarded to NXG. Prof. Rodrigo Willemart, Prof. Fausto Nomura, and anonymous reviewers for their comments on the manuscript.

## Competing interests

No competing interests declared.

## Author contribution

NXG and FMG contributed to the design of the study. NXG wrote the manuscript and ran the statistical analyses. FMG supervised the analyses and commented on the manuscript.

## References

- Ajuria-Ibarra H, Tapia-McClung H, Rao D (2017) Mapping the variation in spider body colouration from an insect perspective. *Evol Ecol* 1–19. doi: 10.1007/s10682-017-9904-5
- Andersson S, Prager M (2006) Quantifying colors. *Bird Coloration Vol. I* (eds K.J. McGraw & G.E. Hill), 41–89. Harvard University Press, Cambridge, MA.
- Arnold SEJ, Faruq S, Savolainen V, McOwan PW, Chittka L (2010) FReD: The Floral Reflectance Database – A Web Portal for Analyses of Flower Colour. *PLoS ONE* 5(12): e14287. doi:10.1371/journal.pone.0014287.
- Avarguès-Weber A, Giurfa M (2014) Cognitive components of color vision in honeybees: how conditioning variables modulate color learning and discrimination. *J Comp Physiol A* 200(6): 449-461. Doi: 10.1007/s00359-014-0909-z
- Attali D (2016) R package ‘ggExtra’: Add marginal histograms to ‘ggplot2’, and more ‘ggplot2’ enhancements (version 0.6). <https://CRAN.R-project.org/package=ggExtra>
- Auguie B (2016) R package ‘gridExtra’: Miscellaneous functions for “grid” graphics (version 2.2.1). <https://CRAN.R-project.org/package=gridExtra>
- Batalha MA, Martins FR (2004) Reproductive phenology of the cerrado plant community in Emas National Park (central Brazil). *Aus J Bot* 52(2): 149-161.
- Bates D, Maechler M, Bolker B, Walker S (2015) Fitting Linear Mixed-Effects Models Using lme4. *J Stat Softw*, 67(1):1-48. Doi:10.18637/jss.v067.i01
- Bond AB (2007) The Evolution of Color Polymorphism: Crypticity, Searching Images, and Apostatic Selection. *Annu Rev Ecol Evol Syst* 38:489–514. doi: 10.1146/annurev.ecolsys.38.091206.095728

- Brandley N, Johnson M, Johnsen S (2016) Aposematic signals in North American black widows are more conspicuous to predators than to prey. *Behav Ecol* p.arw014. doi: 10.1093/beheco/arw014
- Briscoe AD, Chittka L (2001) The evolution of color vision in insects. *Annu Rev Entomol* 46:471–510. doi: 10.1146/annurev.ento.46.1.471
- Chiao C-C, Wu W-Y, Chen S-H, Yang E-C (2009) Visualization of the spatial and spectral signals of orb-weaving spiders, *Nephila pilipes*, through the eyes of a honeybee. *J Exp Biol* 212:2269–78. doi: 10.1242/jeb.030734
- Chittka L (1992) The colour hexagon: a chromaticity diagram based on photoreceptor excitations as a generalized representation of colour opponency. *J Comp Physiol A* 170(5):533-543. doi: 10.1007/BF00199331
- Chittka L (1996) Optimal sets of color receptors and color opponent systems for coding of natural objects in insect vision. *J Theor Biol* 181(2):179-196. doi: 10.1006/jtbi.1996.0124
- Chittka L, Menzel R (1992) The evolutionary adaptation of flower colours and the insect pollinators' colour vision. *J Comp Physiol A* 171(2):171-181. doi: 10.1007/BF00188925
- Chittka L, Kevan PG (2005) Flower colour as advertisement. *Pract Pollinat Biol* 157–230.
- Chittka L, Shmida A, Troje N, Menzel R (1994) Ultraviolet as a component of flower reflections, and the colour perception of hymenoptera. *Vision Res* 34:1489–1508. doi: 10.1016/0042-6989(94)90151-1
- Clarke BC (1979) The evolution of genetic diversity. *Proc R Soc Lond* 205:453-474. doi: 10.1098/rspb.1979.0079
- Craig CL, Ebert K (1994) Colour and Pattern in Predator–Prey Interactions: The Bright Body Colours and Patterns of a Tropical Orb-Spinning Spider Attract Flower-Seeking Prey. *Funct Ecol* 8:616–620. doi: 10.2307/2389923
- Dyer AG, Chittka L (2004) Fine colour discrimination requires differential conditioning in bumblebees. *Naturwissenschaften* 91(5):224-227. doi: 10.1007/s00114-004-0508-x
- Edmunds J, Edmunds M (1983) The defensive mechanisms of orb weavers (Araneae: Araneidae) in Ghana, West Africa. In: *Proc 9th Int Cong Arachnol, Panama* 73-89.
- Eguchi E, Watanabe K, Hariyama T, Yamamoto K (1982) A comparison of electrophysiologically determined spectral responses in 35 species of Lepidoptera. *J*

- Insect Physiol 28:675–682. doi: 10.1016/0022-1910(82)90145-7
- Elgar MA, Jebb M (1999) Nest provisioning in the mud-dauber wasp *Sceliphron laetum* (F. Smith): Body mass and taxa specific prey selection. *Behaviour* 136:147-159. doi: 10.1163/156853999501252
- Endler JA (1983) Natural and sexual selection on color patterns in poeciliid fishes. *Environ Biol Fish* 9(2): 173-190. doi: 10.1007/BF00690861
- Endler JA (1990) On the measurement and classification of colour in studies of animal colour patterns. *Biol J Linn Soc* 41:315–352. doi: 10.1111/j.1095-8312.1990.tb00839.x
- Endler JA (1992) Signals, signal conditions, and the direction of evolution. *Am Nat* S125-S153. doi: 10.1086/285308
- Endler JA (1993) Some general comments on the evolution and design of animal communication systems. *Philos Trans R Soc B Biol Sci* 340:215–225. doi: 10.1098/rstb.1993.0060
- Endler JA, Greenwood J (1988) Frequency-dependent predation, crypsis and aposematic coloration [and Discussion]. *Philos Trans R Soc Lond B* 319:505-523. doi: 10.1098/rstb.1988.0062
- Endler JA, Mappes J (2004) Predator mixes and the conspicuousness of aposematic signals. *Am Nat* 163:532–547. doi: 10.1086/382662
- Endler JA, Mielke JR PW (2005) Comparing entire colour patterns as birds see them. *Biol J Linnean Soc*, 86(4): 405-431. doi: 10.1111/j.1095-8312.2005.00540.x
- Fan CM, Yang EC, Tso IM (2009) Hunting efficiency and predation risk shapes the color-associated foraging traits of a predator. *Behav Ecol* 20:808–816. doi: 10.1093/beheco/arp064
- Farkas TE, Mononen T, Comeault AA, Hanski I, Nosil P (2013) Evolution of camouflage drives rapid ecological change in an insect community. *Curr Biol* 23(19):1835-1843. doi: 10.1016/j.cub.2013.07.067
- Foelix RF (2010) *Biology of Spiders*. Oxford: Oxford University Press. doi: 10.1163/187631283X00371
- Gawryszewski FM (2007) Policromatismo e stabilimentum em *Gasteracantha cancriformis* (Araneae, Araneidae): caracterização e as hipóteses da atração de presas e da proteção da teia. Masters Thesis, Universidade de Brasília.

- Gawryszewski FM (2017) Colour vision models: a practical guide, some simulations, and colourvision R package. bioRxiv. doi: 10.1101/103754, R package version 1.1, <http://eselab.weebly.com>.
- Gawryszewski FM, Motta PC (2012) Colouration of the orb-web spider *Gasteracantha cancriformis* does not increase its foraging success. *Ethol Ecol Evol* 24:23–38. doi: 10.1080/03949370.2011.582044
- Giurfa M, Vorobyev M, Kevan P, Menzel R (1996) Detection of coloured stimuli by honeybees: minimum visual angles and receptor specific contrasts. *J Comp Physiol A* 178(5):699-709. doi: 10.1007/BF00227381
- Giurfa M, Vorobyev M, Brandt R, Posner B, Menzel R (1997) Discrimination of coloured stimuli by honeybees: alternative use of achromatic and chromatic signals. *J Comp Physiol A* 180:235–243. doi: 10.1007/s003590050044
- Gouveia, GP, Felfili, JM (1998) Fenologia de comunidades de cerrado e de mata de galeria no Brasil Central. *Rev Árvore*, 22(4):443-450.
- Govardovskii VI, Fyhrquist N, Reuter T, Kuzmin DG, Donner K (2000) In search of the visual pigment template. *Vis Neurosci* 17:509–528. doi: 10.1017/S0952523800174036
- Gray SM, McKinnon JS (2007) Linking color polymorphism maintenance and speciation. *Trends Ecol Evol* 22:71–79. doi: 10.1016/j.tree.2006.10.005
- Guindre-Parker S, Gilchrist HG, Baldo S, Doucet, SM, Love OP (2012) Multiple achromatic plumage ornaments signal to multiple receivers. *Behav Ecol* 24(3): 672-682.
- Hart NS (2001) The visual ecology of avian photoreceptors. *Prog Retin Eye Res* 20:675–703. doi: 10.1016/S1350-9462(01)00009-X
- Hauber ME (2002) Conspicuous colouration attracts prey to a stationary predator. *Ecol Entomol* 27:686 - 691. doi: 10.1046/j.1365-2311.2002.00457.x
- Irwin RE, Strauss SY, Storz S, Emerson A, Guibert G (2003) The role of herbivores in the maintenance of a flower color polymorphism in wild radish. *Ecology* 84(7): 1733-1743.
- Kelber A, Henze MJ (2013) Colour vision: Parallel pathways intersect in *Drosophila*. *Curr Biol* 23(23):R1043-R1045. doi: 10.1016/j.cub.2013.10.025

- Kemp DJ, Holmes C, Congdon BC, Edwards W (2013) Color polymorphism in spiny spiders (*Gasteracantha fornicata*): testing the adaptive significance of a geographically clinal lure. *Ethology*, 119(12): 1126-1137.
- Levi HW (1978) The American orb-weaver genera *Colpopeira*, *Micrathena* and *Gasteracantha* North of Mexico (Araneae, Araneidae). *Bull Mus Comp Zool* 148:417-442.
- Lunau K (2000) The ecology and evolution of visual pollen signals. *Plant Syst Evol* 222(1):89-111. doi: 10.1007/BF00984097
- Lunau K (2014) Visual ecology of flies with particular reference to colour vision and colour preferences. *J Comp Physiol A* 200(6): 497-512. doi: 10.1007/s00359-014-0895-1
- Maia R, White T (2017) Comparing colours using visual models. *bioRxiv*, 175992.
- Maia R, Eliason CM, Bitton PP, Doucet SM, Shawkey (2013) pavo: an R package for the analysis, visualization and organization of spectral data. *Methods Ecol Evol* 4(10):609-613. doi:10.1111/2041-210x.12069
- Muma MH (1971) Biological and behavioral notes on *Gasteracantha cancriformis* (Arachnida: Araneidae). *Fla Entomol* 54:345-351. doi: 10.2307/3493600
- Nakagawa S, Schielzeth H (2013) A general and simple method for obtaining  $R^2$  from generalized linear mixed-effects models. *Methods Ecol Evol* 4(2):133-142.
- O'Hanlon JC (2014) The roles of colour and shape in pollinator deception in the orchid mantis *Hymenopus coronatus*. *Ethology* 120(7), 652-661. doi: 10.1111/eth.12238
- O'Hanlon JC, Holwell GI, Herberstein, ME (2013) Pollinator deception in the orchid mantis. *Am Nat* 183(1):126-132. doi: 10.1086/673858
- O'Hanlon JC, Holwell GI, Herberstein ME (2014) Predatory pollinator deception: Does the orchid mantis resemble a model species?. *Curr Zool* 60(1): 90-103. doi: 10.1093/czoolo/60.1.90.
- Oliveira, PEAM (2008) Fenologia e biologia reprodutiva de espécies do Cerrado. *Cerrado: ecologia e flora*: 273-290.
- Oliveira-Filho AT, Ratter JA (2002) Vegetation Physiognomies and Woody Flora of the Cerrado Biome. *Cerrados Brazil Ecol Nat Hist a Neotrop Savanna* 91-120. doi: 10.1663/0013-0001(2003)057[0656:DFABRE]2.0.CO;2

- Osorio, D., Miklósi, A., & Gonda, Z. (1999) Visual ecology and perception of coloration patterns by domestic chicks. *Evolutionary Ecology*, 13(7), 673-689. doi: 10.1023/A:1011059715610
- Peitsch D, Fietz A, Hertel H, et al (1992) The spectral input systems of hymenopteran insects and their receptor-based colour vision. *J Comp Physiol A* 170:23–40. doi: 10.1007/BF00190398
- Pinheiro J, Bates D, DebRoy S, Sarkar D, R Core Team (2016) R package ‘nlme’: Linear and Nonlinear Mixed Effects Models (version 3.1-128). <http://CRAN.R-project.org/package=nlme>>.
- R Core Team (2015) R: A language and environment for statistical computing. R Foundation for Statistical Computing, Vienna, Austria. <https://www.R-project.org/>.
- Rao D, Mendoza-Cuenca L (2016) The effect of colour polymorphism on thermoregulation in an orb web spider. *Sci Nat* 103(7–8): 1–5. doi: 10.1007/s00114-016-1388-6
- Ratcliffe JM, Nydam ML (2008) Multimodal warning signals for a multiple predator world. *Nature* 455(7209): 96-100. doi: 10.1038/nature07087
- Rayor L (1996) Attack strategies of predatory wasps (Hymenoptera: Pompilidae; Sphecidae) on colonial orb web-building spiders (Araneidae: *Metepira Incrassata*). *J Kans Entomol Soc* 69:67–75.
- Renoult JP, Kelber A, Schaefer HM (2015) Colour spaces in ecology and evolutionary biology. *Biol Rev* 92(1):292-315 doi: 10.1111/brv.12230
- Rojas B, Rautiala P, Mappes J (2014). Differential detectability of polymorphic warning signals under varying light environments. *Behav Process* 109:164-172.
- Ruxton GD, Sherratt TN, Speed MP (2004) *Avoiding Attack*. First edition. Oxford: Oxford University Press, USA. doi: 10.1093/acprof:oso/9780198528609.001.0001
- Ryan MJ (1990) Sexual selection, sensory systems and sensory exploitation. *Oxf Sur Evol Biol* 7:157-195.
- Schaefer HM, Schaefer V, Levey DJ (2004) How plant–animal interactions signal new insights in communication. *Trends Ecol Evol* 19(11): 577-584. doi: 10.1016/j.tree.2004.08.003
- Schnaitmann C, Garbers C (2013) Article Color Discrimination with Broadband



- Photoreceptors. *Curr Biol* 23:2375–2382. doi: 10.1016/j.cub.2013.10.037
- Stevens M, Ruxton GD (2012) Linking the evolution and form of warning coloration in nature. *Proc R Soc B* 279(1728):417-426
- Tiedemann KB, Ventura DF, Ades C (1986) Spectral sensitivities of the eyes of the orb web spider *Argiope argentata* (Fabricius). *J Arachnol*, 71-78.
- Tinbergen L (1960) The natural control of insects in pine woods I. Factors influencing the intensity of predation by songbirds. *Arch Néerl Zool* 13, 265h. N.
- Théry M, Casas J (2002) Predator and prey views of spider camouflage. *Nature*, 415:133–133. doi: 10.1038/415133a
- Théry M, Gomez D (2010). Insect colours and visual appearance in the eyes of their predators. *Adv Insect Physiol* 38:267 - 353. doi: 10.1016/S0065-2806(10)38001-5
- Théry M, Debut M, Gomez D, Casas J (2005) Specific color sensitivities of prey and predator explain camouflage in different visual systems. *Behav Ecol* 16:25-29. doi: 10.1093/beheco/arh130
- Troscianko T, Benton CP, Lovell PG, Tolhurst DJ, Pizlo Z (2009) Camouflage and visual perception. *Philos Trans R Soc B Biol Sci* 364:449-461. doi: 10.1098/rstb.2008.0218
- Tso IM (2013). Insect view of orb spider body colorations. In *Spider Ecophysiology* (pp. 319-332). Springer Berlin Heidelberg. doi: 10.1007/978-3-642-33989-9\_23
- Tso I, Tai P, Ku T, Kuo C, Yang E (2002) Colour-associated foraging success and population genetic structure in a sit-and-wait predator *Nephila maculata* (Araneae: Tetragnathidae). *Anim Behav* 63:175–182. doi: 10.1006/anbe.2001.1878
- Tso I, Lin C, Yang E (2004) Colourful orb-weaving spiders, *Nephila pilipes*, through a bee's eyes. 2631–2637. doi: 10.1242/jeb.01068
- Tso I, Tai P, Ku T, et al (2002) Colour-associated foraging success and population genetic structure in a sit-and-wait predator *Nephila maculata* (Araneae: Tetragnathidae). *Anim Behav* 63:175–182. doi: 10.1006/anbe.2001.1878
- Tummers B (2006) DataThief III. <http://datathief.org/>
- Vorobyev M, Osorio D (1998) Receptor noise as a determinant of colour thresholds. *Proc R Soc Lond B Biol Sci*, 265(1394): 351-358. doi: 10.1098/rspb.1998.0302

White TE, Dalrymple RL, Herberstein ME, Kemp DJ (2016) The perceptual similarity of orb-spider prey lures and flower colours. *Evol Ecol* 1-20. doi: 10.1007/s10682-016-9876-x

White TE, Kemp DJ (2015) Technicolour deceit: a sensory basis for the study of colour-based lures. *Anim Behav* 105:231–243. doi: 10.1016/j.anbehav.2015.04.025

White TE, Kemp DJ (2016) Colour polymorphic lures target different visual channels in prey. doi: 10.1111/evo.12948

Wickham H (2009) R package ‘ggplot2’: Elegant graphics for data analysis. Springer-Verlag New York.

530

## Tables

Table 1. Delta Akaike Information Criterion ( $\Delta$ AIC) and determination coefficients of Linear Mixed Models of the chromatic and achromatic contrasts of prey and predators.

| Model                                                   | df | $\Delta$ AIC | Marginal $R^2$ | Conditional $R^2$ |
|---------------------------------------------------------|----|--------------|----------------|-------------------|
| <b><i>Multiple prey hypothesis</i></b>                  |    |              |                |                   |
| <b>Chromatic dimension</b>                              |    |              |                |                   |
| $\Delta S \sim \text{morph}^* \text{observer}$          | 17 | 0.0          | 0.87           | 0.96              |
| $\Delta S \sim \text{morph} + \text{observer}$          | 11 | 23.9         | 0.89           | 0.95              |
| $\Delta S \sim \text{observer}$                         | 8  | 52.4         | 0.33           | 0.96              |
| $\Delta S \sim \text{morph}$                            | 9  | 61.5         | 0.50           | 0.51              |
| $\Delta S \sim 1$                                       | 6  | 90.6         | 0              | 0.53              |
| <b>Achromatic dimension</b>                             |    |              |                |                   |
| <b>excitation</b> $\sim \text{morph}^* \text{observer}$ | 17 | 0.0          | 0.82           | 0.99              |
| excitation $\sim \text{morph} + \text{observer}$        | 11 | 57.6         | 0.77           | 0.86              |
| excitation $\sim \text{morph}$                          | 9  | 72.2         | 0.79           | 0.89              |
| excitation $\sim \text{observer}$                       | 8  | 84.7         | 0.004          | 0.60              |
| excitation $\sim 1$                                     | 6  | 100.2        | 0              | 0.66              |
| <b><i>Multiple predator hypothesis</i></b>              |    |              |                |                   |
| <b>Chromatic dimension</b>                              |    |              |                |                   |
| $\Delta S \sim \text{morph}^* \text{observer}$          | 13 | 0.0          | 0.86           | 0.99              |
| $\Delta S \sim \text{morph} + \text{observer}$          | 10 | 6.9          | 0.88           | 0.99              |
| $\Delta S \sim \text{observer}$                         | 7  | 30.6         | 0.29           | 0.99              |
| $\Delta S \sim \text{morph}$                            | 9  | 54.5         | 0.58           | 0.58              |
| $\Delta S \sim 1$                                       | 6  | 74.9         | 0              | 0.63              |

| <b>Achromatic dimension</b>        |           |            |             |          |
|------------------------------------|-----------|------------|-------------|----------|
| <b>excitation ~ morph*observer</b> | <b>14</b> | <b>0.0</b> | <b>0.78</b> | <b>1</b> |
| excitation ~ morph+observer        | 10        | 14.4       | 0.78        | 0.96     |
| excitation ~ observer              | 7         | 21.1       | 0.007       | 0.86     |
| excitation ~ morph                 | 9         | 36.9       | 0.80        | 0.98     |
| excitation ~ 1                     | 6         | 43.9       | 0           | 0.92     |

Table 2. Delta Akaike Information Criterion ( $\Delta$ AIC) and determination coefficients of Linear Mixed Models of the chromatic and achromatic contrasts between spider morphs and flower categories.

|                                                                                                                | df  | $\Delta$ AIC | Marg. R <sup>2</sup> | Cond. R <sup>2</sup> |
|----------------------------------------------------------------------------------------------------------------|-----|--------------|----------------------|----------------------|
| <b>Chromatic dimension</b>                                                                                     |     |              |                      |                      |
| $\Delta S \sim \text{morph} * \text{flower} * \text{observer} + (1   \text{IDflower}) + (1   \text{IDspider})$ | 111 | 0            | 0.67                 | 0.82                 |
| $\Delta S \sim \text{morph} * \text{flower} + \text{observer} + (1   \text{IDflower}) + (1   \text{IDspider})$ | 41  | -22276.39    | 0.60                 | 0.75                 |
| $\Delta S \sim \text{morph} * \text{flower} + (1   \text{IDflower}) + (1   \text{IDspider})$                   | 39  | -39316.11    | 0.55                 | 0.70                 |
| $\Delta S \sim \text{morph} * \text{observer} + \text{flower} + (1   \text{IDflower}) + (1   \text{IDspider})$ | 23  | -58911.74    | 0.46                 | 0.61                 |
| $\Delta S \sim \text{morph} * \text{observer} + (1   \text{IDflower}) + (1   \text{IDspider})$                 | 15  | -59819.05    | 0.28                 | 0.61                 |
| $\Delta S \sim \text{morph} + \text{flower} * \text{observer} + (1   \text{IDflower}) + (1   \text{IDspider})$ | 33  | -62659.22    | 0.44                 | 0.59                 |
| $\Delta S \sim \text{Flower} * \text{observer} + (1   \text{IDflower}) + (1   \text{IDspider})$                | 30  | -62679.69    | 0.25                 | 0.60                 |
| $\Delta S \sim \text{morph} + \text{flower} + \text{observer} + (1   \text{IDflower}) + (1   \text{IDspider})$ | 17  | -64825.9     | 0.43                 | 0.58                 |
| $\Delta S \sim \text{flower} + \text{observer} + (1   \text{IDflower}) + (1   \text{IDspider})$                | 14  | -64846.37    | 0.24                 | 0.58                 |
| $\Delta S \sim \text{morph} + \text{observer} + (1   \text{IDflower}) + (1   \text{IDspider})$                 | 9   | -65733.21    | 0.25                 | 0.58                 |
| $\Delta S \sim \text{observer} + (1   \text{IDflower}) + (1   \text{IDspider})$                                | 6   | -65753.68    | 0.06                 | 0.57                 |
| $\Delta S \sim \text{morph} + \text{flower} + (1   \text{IDflower}) + (1   \text{IDspider})$                   | 15  | -75210.75    | 0.37                 | 0.52                 |
| $\Delta S \sim \text{flower} + (1   \text{IDflower}) + (1   \text{IDspider})$                                  | 12  | -75231.22    | 0.18                 | 0.52                 |
| $\Delta S \sim \text{morph} + (1   \text{IDflower}) + (1   \text{IDspider})$                                   | 7   | -76118.06    | 0.20                 | 0.52                 |
| $\Delta S \sim 1 + (1   \text{IDflower}) + (1   \text{IDspider})$                                              | 4   | -76138.53    | 0                    | 0.52                 |
| <b>Achromatic dimension</b>                                                                                    |     |              |                      |                      |
| excitation ~ morph * flower * observer + (1   IDflower) + (1   IDspider)                                       | 111 | 0            | 0.49                 | 0.64                 |
| excitation ~ morph * flower + observer + (1   IDflower) + (1   IDspider)                                       | 41  | -13215.1     | 0.42                 | 0.57                 |
| excitation ~ morph * flower + (1   IDflower) + (1   IDspider)                                                  | 39  | -14202.51    | 0.42                 | 0.57                 |
| excitation ~ morph + flower * observer + (1   IDflower) + (1   IDspider)                                       | 33  | -33305.63    | 0.30                 | 0.45                 |
| excitation ~ morph * observer + flower + (1   IDflower) + (1   IDspider)                                       | 23  | -33320.44    | 0.30                 | 0.44                 |
| excitation ~ Flower * observer + (1   IDflower) + (1   IDspider)                                               | 30  | -33331.64    | 0.12                 | 0.45                 |
| excitation ~ morph * observer + (1   IDflower) + (1   IDspider)                                                | 15  | -33835.46    | 0.20                 | 0.45                 |
| excitation ~ morph + flower + observer + (1   IDflower) + (1   IDspider)                                       | 17  | -35420.86    | 0.29                 | 0.43                 |
| excitation ~ flower + observer + (1   IDflower) + (1   IDspider)                                               | 14  | -35446.87    | 0.11                 | 0.43                 |
| excitation ~ morph + observer + (1   IDflower) + (1   IDspider)                                                | 9   | -35935.88    | 0.18                 | 0.43                 |
| excitation ~ observer + (1   IDflower) + (1   IDspider)                                                        | 6   | -35961.89    | 0.05                 | 0.43                 |
| excitation ~ morph + flower + (1   IDflower) + (1   IDspider)                                                  | 15  | -36160.68    | 0.28                 | 0.43                 |

|                                                       |    |           |      |      |
|-------------------------------------------------------|----|-----------|------|------|
| excitation ~ flower + (1   IDflower) + (1   IDspider) | 12 | -36186.69 | 0.10 | 0.43 |
| excitation ~ morph + (1   IDflower) + (1   IDspider)  | 7  | -36675.7  | 0.18 | 0.43 |
| excitation ~ 1 + (1   IDflower) + (1   IDspider)      | 4  | -36701.71 | 0    | 0.43 |

## Figures

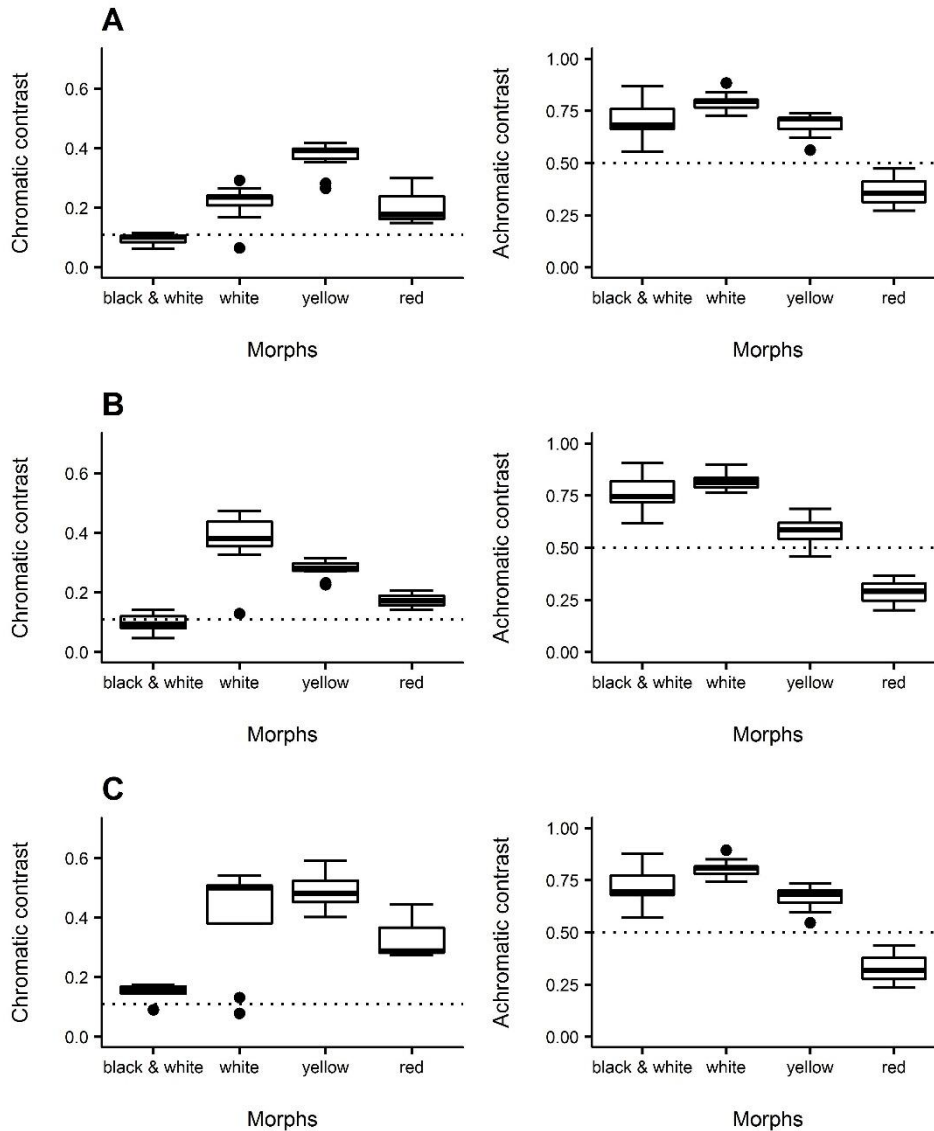

531 **Fig. 1.** Chromatic (left) and achromatic (right) contrasts of four *Gasteracantha cancriformis*  
 532 morphs (black and white, N=6; white, N=10; yellow, N=13; and red, N=3) when viewed  
 533 against a Brazilian savanna background by prey with distinct visual systems. (A) *Apis*  
 534 *mellifera* (Hymenoptera). (B) *Drosophila melanogaster* (Diptera). (C) *Fabriciana adippe*  
 535 (Lepidoptera). Dotted vertical lines represent the discrimination thresholds for chromatic  
 536 contrast (0.11) and photoreceptor excitation for background in achromatic contrast (0.5).

537

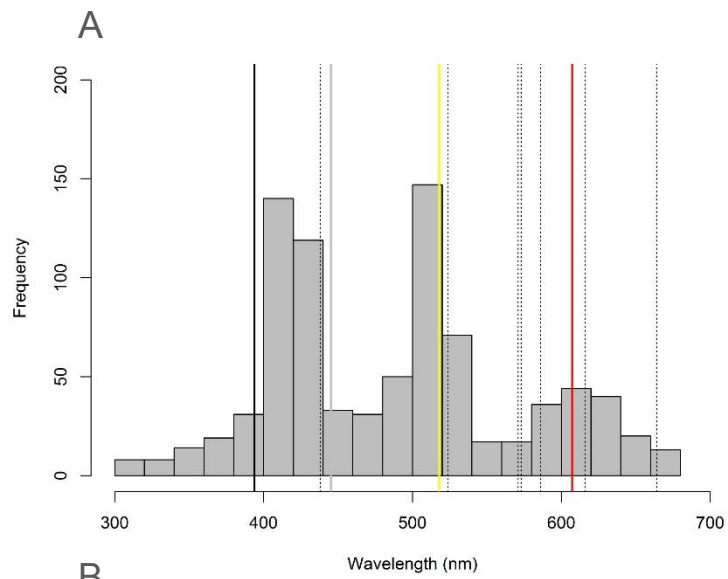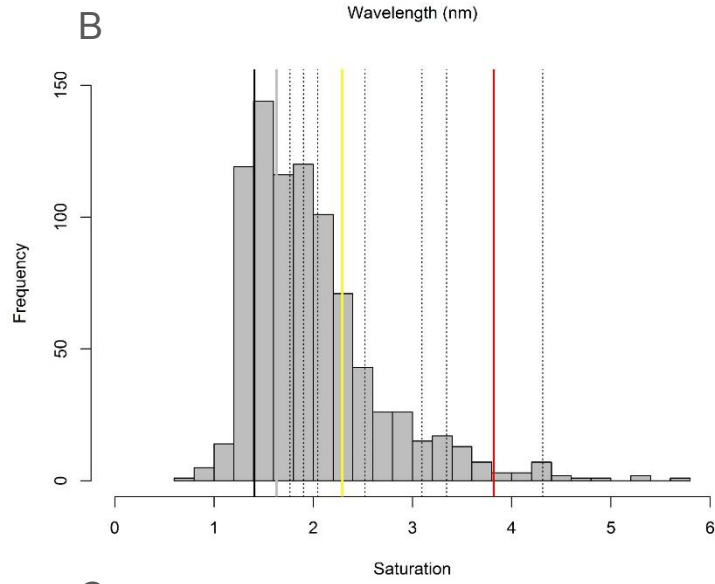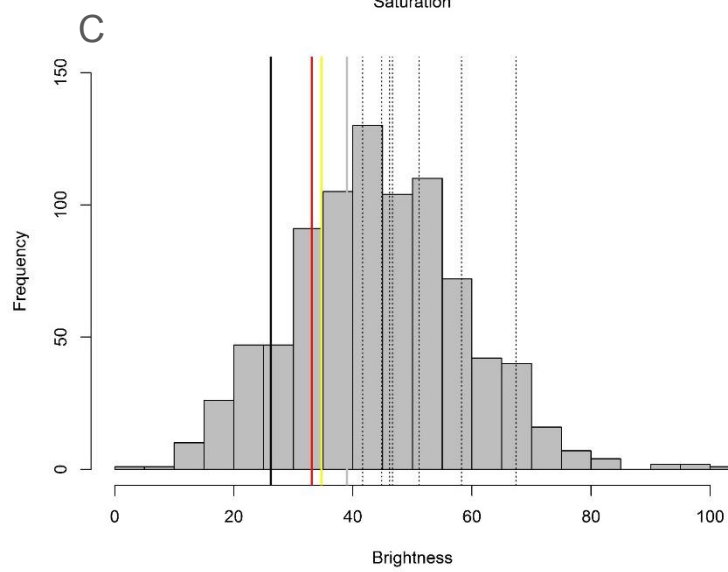

538

539 **Fig. 2.** Frequency of color properties of flowers (N = 859): (A) hue, (B) saturation, (C)  
 540 brightness. Average values of each *Gasteracantha cancriformis* morph are represented  
 541 with solid colored lines: black and white morph (black line; N = 6), white morph (gray  
 542 line, N = 10), yellow morph (yellow line, N = 13), red morph (red line, N = 3). Flowers  
 543 from the Brazilian Savanna (N = 7) are represented with dotted lines.  
 544

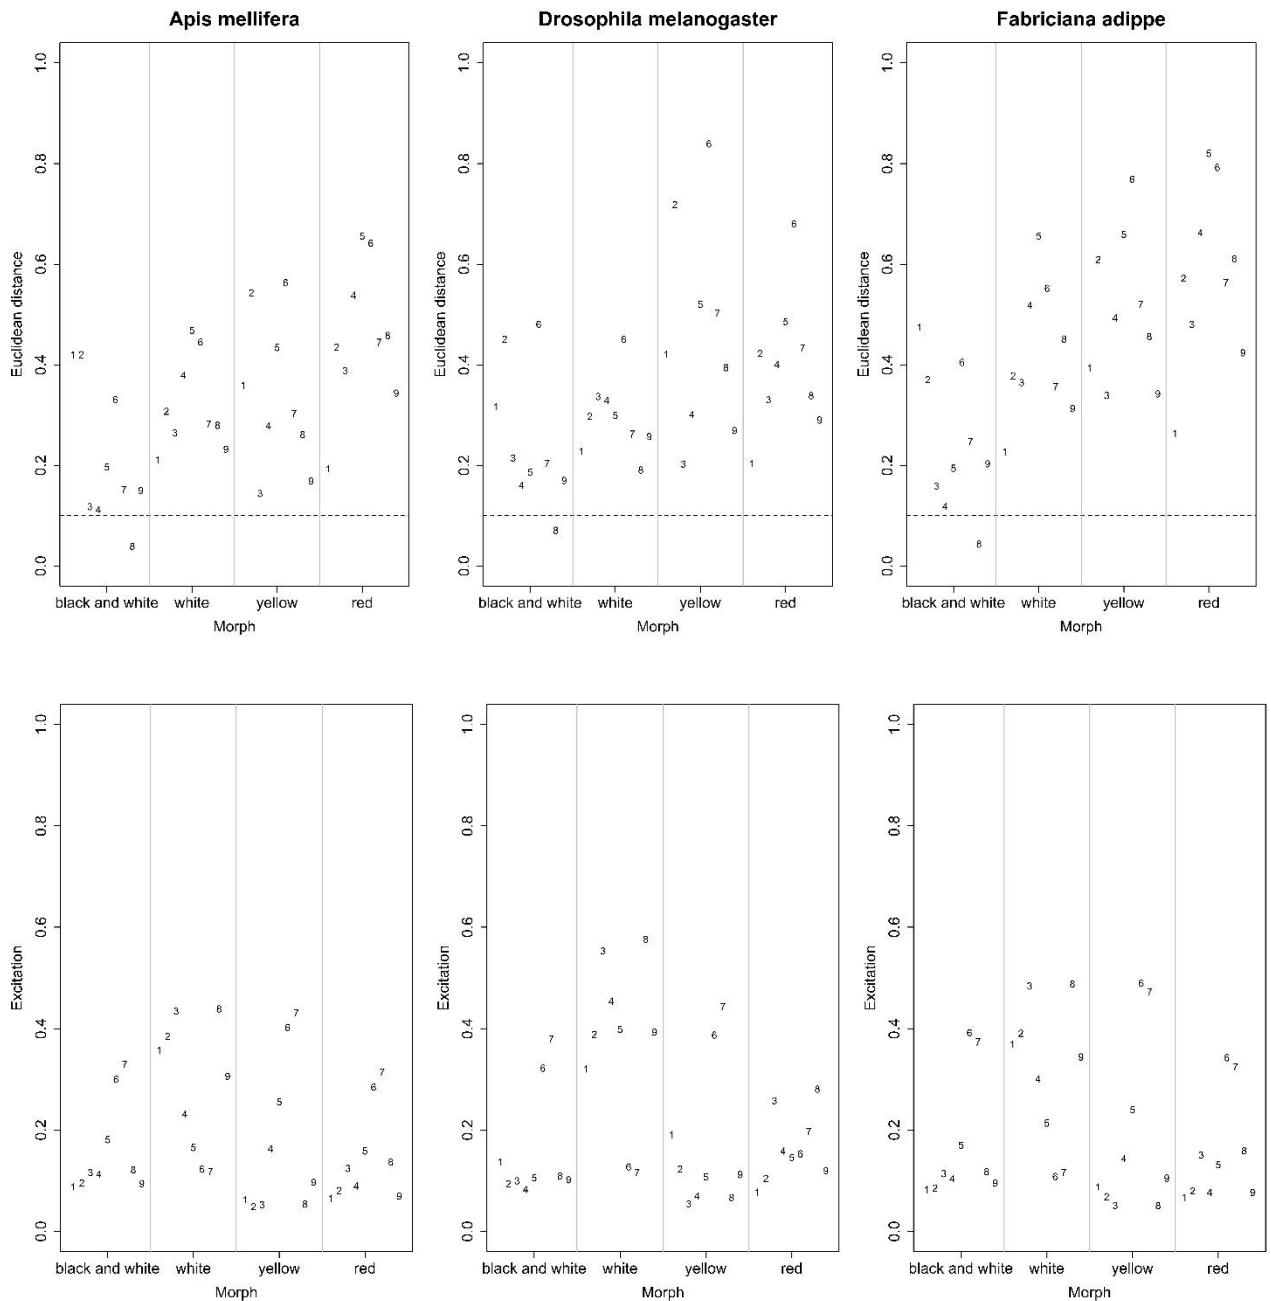

545  
 546 **Fig. 3.** Chromatic (upper) and achromatic (lower) contrasts of four *Gasteracantha*  
 547 *cancriformis* morphs (black and white, N=6; white, N=10; yellow, N=13; and red, N=3)  
 548 when compared with ten flowers categories (Chittka et al., 1994) indicated by numbers.

549 These values were computed considering the Brazilian savanna as background and based  
550 on three potential prey: *Apis mellifera* (Hymenoptera; left), *Drosophila melanogaster*  
551 (Diptera; middle), and *Fabriciana adippe* (Lepidoptera; right). Dotted vertical lines  
552 represent the discrimination thresholds for chromatic contrast (0.11).  
553

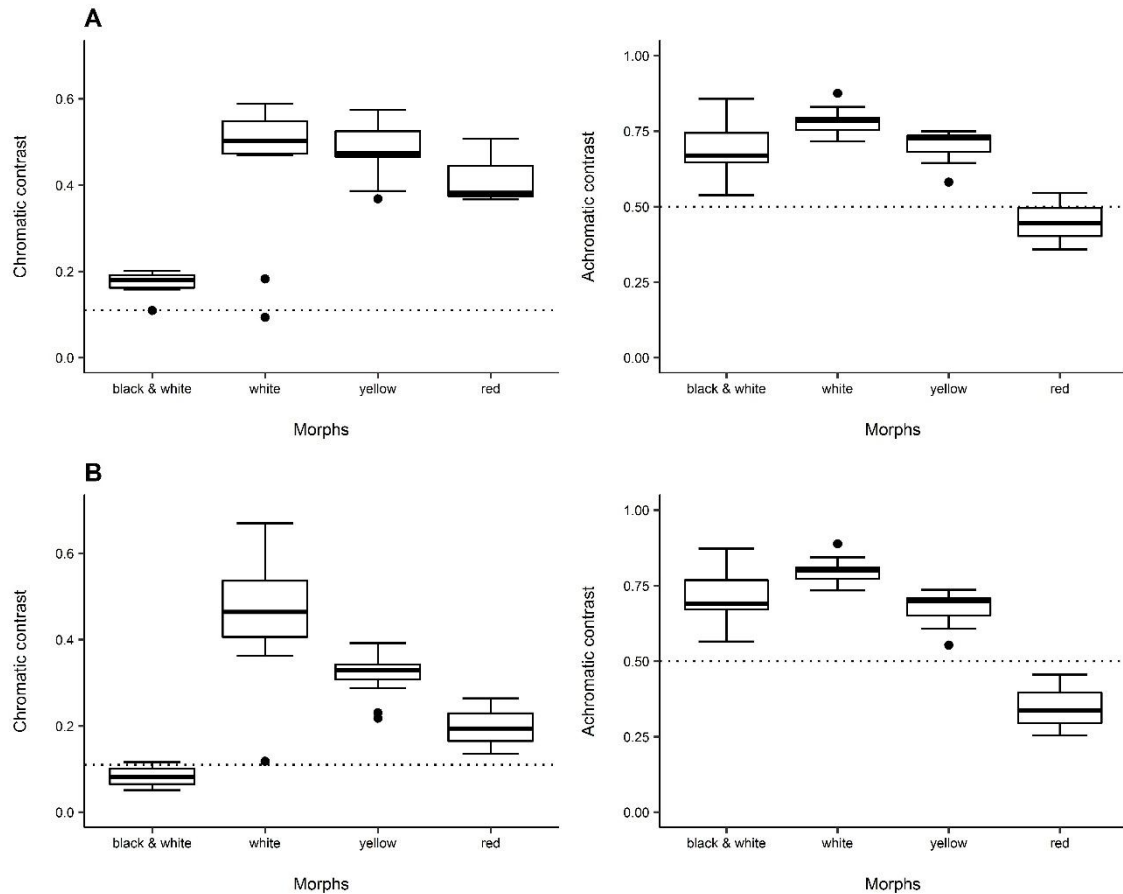

554  
555 **Fig. 4.** Chromatic (left) and achromatic (right) contrasts of four *Gasteracantha cancriformis*  
556 morphs (black and white, N=6; white, N=10; yellow, N=13; and red, N=3) when viewed  
557 against a Brazilian savanna background by predators with distinct visual systems. (A)  
558 *Parus caeruleus* (Passeriformes). (B) *Philanthus Triangulum* (Hymenoptera). Dotted  
559 vertical lines represent the discrimination thresholds for chromatic contrast (0.06) and  
560 photoreceptor excitation for background in achromatic contrast (0.5).
